# Supplementary material for: HYAL1 Is Downregulated in Idiopathic Pulmonary Fibrosis and Inhibits HFL-1 Fibroblast Proliferation When Upregulated
Source: Biomed Res Int. 2020 Mar 11;2020:3659451. doi: 10.1155/2020/3659451 (PMC7086424; doi:10.1155/2020/3659451)
Supplement: Supplementary 1 — Table S1: gene expression data of differentially expressed genes for lentiviral-induced HYAL1 overexpressed HFL-1 and controls. [file 3659451.f1.xlsx]

## Sheet: Different Gene
Entrez	Gene Symbol	Gene Title	NC-1/N5948-1	NC-2/N5948-2	NC-3/N5948-3	OE-1/N5949-1	OE-2/N5949-2	OE-3/N5949-3	Fold Change	logFC	absolute FC	Regulation	P-value	FDR
3373	HYAL1	hyaluronoglucosaminidase 1	4.81145	4.81861	4.67351	7.47762	7.49355	7.45613	6.53374	2.70791	6.53374	up	4.31839e-17	1.6989e-12
5906	RAP1A	RAP1A, member of RAS oncogene family	8.65133	8.60303	8.63285	9.70181	9.82564	9.81323	2.22092	1.15116	2.22092	up	6.36759e-15	1.25254e-10
5887	RAD23B	RAD23 homolog B, nucleotide excision repair protein	8.45375	8.44973	8.52556	9.15105	9.14339	9.19816	1.61088	0.687853	1.61088	up	4.37109e-12	2.86605e-08
3486	IGFBP3	insulin like growth factor binding protein 3	9.70615	9.74616	9.7796	10.2057	10.1932	10.2227	1.37864	0.46325	1.37864	up	5.95354e-11	2.34218e-07
57214	CEMIP	cell migration inducing protein, hyaluronan binding	11.2467	11.2226	11.2037	11.5622	11.5832	11.5906	1.2784	0.354343	1.2784	up	1.06353e-10	3.4867e-07
5552	SRGN	serglycin	7.93395	7.9537	8.00257	8.50468	8.457	8.49236	1.43522	0.521273	1.43522	up	4.70792e-10	1.0895e-06
9076	CLDN1	claudin 1	9.45942	9.46669	9.52622	9.91629	9.87696	9.89449	1.33035	0.411803	1.33035	up	5.46569e-10	1.19459e-06
894	CCND2	cyclin D2	8.58292	8.58925	8.56036	9.0076	8.97621	9.01042	1.33845	0.420567	1.33845	up	1.10091e-09	2.06563e-06
51232	CRIM1	cysteine rich transmembrane BMP regulator 1 (chordin-like)	10.795	10.7812	10.8113	11.097	11.1015	11.151	1.2489	0.320663	1.2489	up	1.31401e-09	2.34975e-06
55214	P3H2	prolyl 3-hydroxylase 2	9.52186	9.60451	9.55858	9.95662	10.077	10.0903	1.3944	0.47964	1.3944	up	1.59318e-09	2.65345e-06
9369	NRXN3	neurexin 3	7.82903	7.86219	7.98167	8.43135	8.41491	8.44539	1.45356	0.539587	1.45356	up	2.50645e-09	3.94425e-06
5054	SERPINE1	serpin peptidase inhibitor, clade E (nexin, plasminogen activator inhibitor type 1), member 1	11.3682	11.4303	11.3919	11.6781	11.6806	11.713	1.22584	0.293773	1.22584	up	2.64323e-09	3.99951e-06
54674	LRRN3	leucine rich repeat neuronal 3	10.8208	10.8857	10.8816	11.1704	11.1623	11.1693	1.23508	0.304607	1.23508	up	3.05805e-09	4.29667e-06
1277	COL1A1	collagen, type I, alpha 1	10.5165	10.4862	10.4952	10.7724	10.7937	10.8093	1.22477	0.292507	1.22477	up	3.89374e-09	5.2822e-06
4973	OLR1	oxidized low density lipoprotein (lectin-like) receptor 1	8.60856	8.59873	8.67933	8.99604	9.05543	9.0163	1.31377	0.393717	1.31377	up	9.38358e-09	8.6997e-06
9052	GPRC5A	G protein-coupled receptor, class C, group 5, member A	7.33676	7.31526	7.32779	7.77473	7.78659	7.85613	1.39398	0.479213	1.39398	up	8.2381e-09	8.6997e-06
9601	PDIA4	protein disulfide isomerase family A member 4	10.4238	10.3889	10.4008	10.1143	10.1228	10.1392	-1.2134	-0.279057	1.2134	down	1.20938e-08	9.98388e-06
256691	MAMDC2	MAM domain containing 2	8.22096	8.23523	8.30692	8.64322	8.67468	8.74128	1.34912	0.432023	1.34912	up	1.23527e-08	9.98388e-06
440	ASNS	asparagine synthetase (glutamine-hydrolyzing)	9.26338	9.41707	9.40634	9.76765	9.7893	9.78266	1.33571	0.417607	1.33571	up	1.47978e-08	1.11954e-05
6347	CCL2	chemokine (C-C motif) ligand 2	9.60479	9.57977	9.66805	9.94636	9.92895	10.0037	1.26762	0.34212	1.26762	up	2.02963e-08	1.44097e-05
23767	FLRT3	fibronectin leucine rich transmembrane protein 3	7.90985	7.90255	7.90725	8.29835	8.26452	8.33913	1.31414	0.394117	1.31414	up	2.08778e-08	1.44097e-05
10699	CORIN	corin, serine peptidase	6.05732	6.15566	6.21223	6.73757	6.76321	6.88733	1.57385	0.6543	1.57385	up	2.15701e-08	1.46309e-05
6659	SOX4	SRY-box 4	9.85634	9.81581	9.79601	9.41398	9.50326	9.51177	-1.27137	-0.346383	1.27137	down	2.46065e-08	1.51257e-05
147372	CCBE1	collagen and calcium binding EGF domains 1	9.92739	9.90225	9.89762	10.1929	10.1637	10.1919	1.20892	0.273723	1.20892	up	2.39834e-08	1.51257e-05
151887	CCDC80	coiled-coil domain containing 80	8.28356	8.28249	8.29339	8.70002	8.71066	8.88429	1.3933	0.47851	1.3933	up	2.68385e-08	1.59978e-05
4015	LOX	lysyl oxidase	10.0036	10.0923	10.1039	10.4225	10.3581	10.4071	1.25641	0.329303	1.25641	up	2.77902e-08	1.63178e-05
54532	USP53	ubiquitin specific peptidase 53	8.53317	8.57916	8.60525	8.90569	8.91325	8.96759	1.28015	0.356317	1.28015	up	3.24422e-08	1.87693e-05
79974	CPED1	cadherin-like and PC-esterase domain containing 1	10.1133	10.1723	10.1844	10.4829	10.4219	10.4416	1.22444	0.292127	1.22444	up	3.5485e-08	1.99431e-05
10797	MTHFD2	methylenetetrahydrofolate dehydrogenase (NADP+ dependent) 2, methenyltetrahydrofolate cyclohydrolase	9.22019	9.23045	9.23135	9.53455	9.57125	9.67704	1.28962	0.36695	1.28962	up	3.79079e-08	2.10047e-05
1601	DAB2	Dab, mitogen-responsive phosphoprotein, homolog 2 (Drosophila)	10.7855	10.8043	10.8171	11.0275	11.0299	11.0594	1.17826	0.236657	1.17826	up	4.01876e-08	2.16578e-05
4017	LOXL2	lysyl oxidase like 2	11.1968	11.2305	11.2337	11.4369	11.4542	11.4419	1.16792	0.223947	1.16792	up	4.1746e-08	2.21936e-05
10381	TUBB3	tubulin, beta 3 class III	11.4178	11.3788	11.4358	11.1598	11.1672	11.1914	-1.17935	-0.237993	1.17935	down	4.29166e-08	2.25118e-05
5648	MASP1	mannan-binding lectin serine peptidase 1 (C4/C2 activating component of Ra-reactive factor)	8.53715	8.56945	8.5719	8.85395	8.92834	8.93111	1.27012	0.344967	1.27012	up	4.63188e-08	2.39767e-05
1490	CTGF	connective tissue growth factor	11.721	11.7466	11.6993	12.0253	11.9341	11.9716	1.19308	0.254687	1.19308	up	5.06705e-08	2.49179e-05
10457	GPNMB	glycoprotein (transmembrane) nmb	6.19563	6.18684	6.21189	5.40244	5.46371	5.65225	-1.61551	-0.691987	1.61551	down	6.14605e-08	2.81153e-05
56911	MAP3K7CL	MAP3K7 C-terminal like	8.84082	8.87422	8.92923	9.27641	9.17136	9.26658	1.28049	0.356693	1.28049	up	7.99663e-08	3.36717e-05
7357	UGCG	UDP-glucose ceramide glucosyltransferase	10.5901	10.6372	10.6258	10.8671	10.8318	10.8678	1.17927	0.237893	1.17927	up	8.02193e-08	3.36717e-05
8710	SERPINB7	serpin peptidase inhibitor, clade B (ovalbumin), member 7	9.29561	9.39053	9.35399	9.65014	9.65209	9.73899	1.26024	0.333697	1.26024	up	8.13397e-08	3.3684e-05
144165	PRICKLE1	prickle homolog 1	9.64539	9.63904	9.70358	9.91472	9.99284	10.0165	1.24144	0.312017	1.24144	up	8.63962e-08	3.54053e-05
1301	COL11A1	collagen, type XI, alpha 1	9.25511	9.266	9.23718	9.63409	9.50757	9.61402	1.25916	0.332463	1.25916	up	9.44271e-08	3.75238e-05
5671	PSG3	pregnancy specific beta-1-glycoprotein 3	8.53037	8.55457	8.59669	8.89816	8.86053	8.96759	1.27299	0.348217	1.27299	up	9.86531e-08	3.87138e-05
23596	OPN3	opsin 3	9.05637	9.04686	9.06791	9.31288	9.33745	9.35953	1.21384	0.279573	1.21384	up	9.93898e-08	3.87138e-05
5673	PSG5	pregnancy specific beta-1-glycoprotein 5	8.53037	8.55457	8.59669	8.89816	8.86053	8.96759	1.27299	0.348217	1.27299	up	9.86531e-08	3.87138e-05
84709	MGARP	mitochondria localized glutamic acid rich protein	10.2832	10.3158	10.3654	10.593	10.558	10.6194	1.20474	0.26872	1.20474	up	1.02848e-07	3.96681e-05
5332	PLCB4	phospholipase C beta 4	8.67347	8.73846	8.77822	9.0322	9.07225	9.07905	1.25799	0.331117	1.25799	up	1.05191e-07	3.97701e-05
8793	TNFRSF10D	tumor necrosis factor receptor superfamily member 10d, decoy with truncated death domain	11.1889	11.2761	11.3015	11.5051	11.5144	11.5406	1.20124	0.26453	1.20124	up	1.23878e-07	4.43045e-05
627	BDNF	brain-derived neurotrophic factor	9.02544	8.94707	9.04418	9.30901	9.29741	9.33239	1.23745	0.307373	1.23745	up	1.36954e-07	4.68513e-05
4883	NPR3	natriuretic peptide receptor 3	7.92995	7.85792	7.89133	8.23781	8.23295	8.23152	1.26666	0.341027	1.26666	up	1.39471e-07	4.73011e-05
11010	GLIPR1	GLI pathogenesis-related 1	10.9362	10.9316	10.9925	11.2661	11.1615	11.2363	1.20402	0.267863	1.20402	up	1.60131e-07	5.33874e-05
91947	ARRDC4	arrestin domain containing 4	7.31331	7.37942	7.50782	7.88463	7.86067	7.82657	1.37279	0.457107	1.37279	up	1.70149e-07	5.53208e-05
2247	FGF2	fibroblast growth factor 2 (basic)	9.26286	9.31775	9.34664	9.6357	9.55956	9.62447	1.22901	0.297493	1.22901	up	1.77737e-07	5.72427e-05
54331	GNG2	guanine nucleotide binding protein (G protein), gamma 2	9.17732	9.1889	9.13888	8.87207	8.89382	8.90409	-1.21283	-0.278373	1.21283	down	1.7897e-07	5.72427e-05
1602	DACH1	dachshund family transcription factor 1	5.07099	4.92898	4.97919	4.25498	4.19015	4.37638	-1.64629	-0.719217	1.64629	down	1.90292e-07	5.84865e-05
2040	STOM	stomatin	10.562	10.5835	10.5567	10.8196	10.7636	10.8549	1.18532	0.245277	1.18532	up	1.88805e-07	5.84865e-05
55076	TMEM45A	transmembrane protein 45A	8.98857	8.97524	8.94533	9.23211	9.22906	9.25962	1.20627	0.27055	1.20627	up	1.95368e-07	5.85099e-05
83445	GSG1	germ cell associated 1	6.39533	6.42209	6.43134	6.81346	6.93097	6.91449	1.38516	0.470053	1.38516	up	2.0499e-07	6.0183e-05
171024	SYNPO2	synaptopodin 2	7.77992	7.61668	7.73825	8.09878	8.22931	8.13237	1.35836	0.44187	1.35836	up	2.16031e-07	6.24916e-05
493	ATP2B4	ATPase, Ca++ transporting, plasma membrane 4	9.22129	9.22189	9.20833	9.44878	9.48124	9.47744	1.19084	0.251983	1.19084	up	2.22412e-07	6.38679e-05
5021	OXTR	oxytocin receptor	7.93529	8.05815	7.97895	8.33285	8.45269	8.36002	1.31135	0.391057	1.31135	up	2.26199e-07	6.44848e-05
1295	COL8A1	collagen, type VIII, alpha 1	9.22981	9.33679	9.30254	9.54902	9.64567	9.63655	1.24894	0.3207	1.24894	up	2.31405e-07	6.52678e-05
8490	RGS5	regulator of G-protein signaling 5	7.60826	7.62272	7.70822	8.02951	7.98068	8.03643	1.29158	0.36914	1.29158	up	2.37204e-07	6.57172e-05
50863	NTM	neurotrimin	7.82677	7.85876	7.89631	8.1846	8.17957	8.20925	1.25747	0.330527	1.25747	up	2.41045e-07	6.58538e-05
59353	TMEM35	transmembrane protein 35	9.99102	9.9917	9.95193	10.2306	10.1924	10.2064	1.17412	0.231583	1.17412	up	2.56189e-07	6.95085e-05
2674	GFRA1	GDNF family receptor alpha 1	6.53314	6.54661	6.58053	6.95639	6.96961	7.00193	1.34029	0.42255	1.34029	up	2.66275e-07	7.15947e-05
4803	NGF	nerve growth factor (beta polypeptide)	7.01216	6.90347	7.0118	7.35924	7.4231	7.40844	1.33896	0.421117	1.33896	up	2.72657e-07	7.24769e-05
22822	PHLDA1	pleckstrin homology-like domain, family A, member 1	10.0633	9.99893	10.0427	9.73559	9.66591	9.80195	-1.23156	-0.300487	1.23156	down	3.06505e-07	7.8812e-05
678	ZFP36L2	ZFP36 ring finger protein-like 2	10.3214	10.3382	10.3737	10.028	10.0676	10.1368	-1.20326	-0.266947	1.20326	down	3.11918e-07	7.96829e-05
11098	PRSS23	protease, serine 23	10.5589	10.6038	10.5765	10.8432	10.7652	10.8325	1.17599	0.23388	1.17599	up	3.3158e-07	8.41592e-05
91624	NEXN	nexilin (F actin binding protein)	9.13177	9.13914	9.11705	9.37291	9.37133	9.44215	1.20259	0.266143	1.20259	up	3.40031e-07	8.5751e-05
10577	NPC2	Niemann-Pick disease, type C2	11.4523	11.433	11.4473	11.2737	11.2511	11.2555	-1.13611	-0.184103	1.13611	down	3.43874e-07	8.60485e-05
5817	PVR	poliovirus receptor	8.20686	8.23778	8.29695	8.56083	8.53517	8.61966	1.2524	0.32469	1.2524	up	3.9349e-07	9.43921e-05
5055	SERPINB2	serpin peptidase inhibitor, clade B (ovalbumin), member 2	9.17607	9.23592	9.34538	9.78433	9.56843	9.70374	1.35008	0.433043	1.35008	up	4.07227e-07	9.70953e-05
2006	ELN	elastin	7.38168	7.2617	7.26824	7.65653	7.71416	7.79559	1.33628	0.41822	1.33628	up	4.65575e-07	0.000109025
83895	KRTAP1-5	keratin associated protein 1-5	10.1115	10.1615	10.2049	10.3737	10.4192	10.4481	1.19282	0.25438	1.19282	up	4.72029e-07	0.000109236
8614	STC2	stanniocalcin 2	11.2344	11.2619	11.2878	11.4406	11.4506	11.4612	1.14032	0.189443	1.14032	up	4.86732e-07	0.00011198
3491	CYR61	cysteine-rich, angiogenic inducer, 61	11.5668	11.5755	11.5795	11.7635	11.7275	11.7609	1.1303	0.1767	1.1303	up	4.92416e-07	0.000112629
22795	NID2	nidogen 2	9.30141	9.35049	9.36741	9.56539	9.60714	9.58561	1.18614	0.246277	1.18614	up	5.70594e-07	0.000127544
386618	KCTD4	potassium channel tetramerization domain containing 4	6.99057	6.98916	7.05442	7.36808	7.4093	7.36191	1.2909	0.36838	1.2909	up	6.01979e-07	0.000133799
26585	GREM1	gremlin 1, DAN family BMP antagonist	12.3117	12.2973	12.344	12.5036	12.4851	12.4718	1.12439	0.169137	1.12439	up	6.07065e-07	0.000134172
3759	KCNJ2	potassium channel, inwardly rectifying subfamily J, member 2	7.55001	7.56065	7.59281	7.86393	7.96143	7.89421	1.26462	0.3387	1.26462	up	6.21559e-07	0.000136608
2621	GAS6	growth arrest specific 6	12.0193	12.0302	12.055	12.1846	12.2174	12.248	1.13433	0.181847	1.13433	up	6.43321e-07	0.00013906
90102	PHLDB2	pleckstrin homology-like domain, family B, member 2	6.75979	6.76133	6.76311	7.10307	7.16241	7.14822	1.29818	0.37649	1.29818	up	6.37756e-07	0.00013906
4982	TNFRSF11B	tumor necrosis factor receptor superfamily member 11b	11.2141	11.2333	11.2355	11.3979	11.4424	11.5066	1.16579	0.22131	1.16579	up	6.76747e-07	0.000142374
1264	CNN1	calponin 1, basic, smooth muscle	8.75942	8.66163	8.73886	9.02165	9.00241	8.98081	1.21559	0.281653	1.21559	up	6.88945e-07	0.000144067
467	ATF3	activating transcription factor 3	6.17002	6.06938	6.03816	6.50182	6.61908	6.59835	1.39529	0.480563	1.39529	up	7.04576e-07	0.00014445
2152	F3	coagulation factor III (thromboplastin, tissue factor)	11.0796	11.0983	11.1157	11.2615	11.282	11.3128	1.13884	0.187567	1.13884	up	8.15996e-07	0.000162955
80380	PDCD1LG2	programmed cell death 1 ligand 2	8.19781	8.10956	8.15892	8.58389	8.41805	8.5361	1.28098	0.35725	1.28098	up	8.48732e-07	0.000168636
10657	KHDRBS1	KH domain containing, RNA binding, signal transduction associated 1	10.6306	10.6255	10.6522	10.4612	10.4377	10.4404	-1.14052	-0.18969	1.14052	down	8.90784e-07	0.000176102
3485	IGFBP2	insulin like growth factor binding protein 2	7.07884	7.01782	6.94199	7.40479	7.37693	7.39478	1.3007	0.379283	1.3007	up	9.07551e-07	0.000177632
4232	MEST	mesoderm specific transcript	10.3057	10.3066	10.3639	10.5248	10.5229	10.5669	1.15892	0.212777	1.15892	up	9.05025e-07	0.000177632
9060	PAPSS2	3'-phosphoadenosine 5'-phosphosulfate synthase 2	10.2741	10.3768	10.3612	10.5523	10.571	10.5985	1.17819	0.236577	1.17819	up	9.61248e-07	0.000185375
9122	SLC16A4	solute carrier family 16 member 4	8.66278	8.61027	8.63224	8.86793	8.91918	8.99376	1.22422	0.29186	1.22422	up	1.05939e-06	0.000193728
221091	LRRN4CL	LRRN4 C-terminal like	8.50895	8.50933	8.55664	8.79959	8.75735	8.84933	1.21177	0.277117	1.21177	up	1.06172e-06	0.000193728
23212	RRS1	ribosome biogenesis regulator homolog	11.1065	11.071	11.1073	10.8832	10.9069	10.9315	-1.13898	-0.18774	1.13898	down	1.04098e-06	0.000193728
283635	FAM177A1	family with sequence similarity 177 member A1	10.2462	10.2932	10.2686	10.4609	10.4562	10.4777	1.14518	0.195577	1.14518	up	1.09162e-06	0.000197882
83604	TMEM47	transmembrane protein 47	10.4371	10.4684	10.4521	10.7098	10.622	10.7444	1.18061	0.23953	1.18061	up	1.09652e-06	0.000197882
10628	TXNIP	thioredoxin interacting protein	9.45901	9.47472	9.44973	9.64786	9.74448	9.71826	1.18294	0.24238	1.18294	up	1.11706e-06	0.000200667
117248	GALNT15	polypeptide N-acetylgalactosaminyltransferase 15	5.67212	5.88582	5.76533	6.31868	6.22615	6.36301	1.44212	0.52819	1.44212	up	1.1616e-06	0.00020772
3216	HOXB6	homeobox B6	10.08	10.1143	10.1314	9.85179	9.89841	9.91803	-1.16407	-0.219177	1.16407	down	1.22321e-06	0.000214358
4837	NNMT	nicotinamide N-methyltransferase	9.75956	9.75945	9.77259	9.9654	9.95192	10.0184	1.16046	0.214693	1.16046	up	1.25059e-06	0.000216541
5352	PLOD2	procollagen-lysine, 2-oxoglutarate 5-dioxygenase 2	10.0824	10.172	10.1625	10.3507	10.3571	10.3742	1.16614	0.221737	1.16614	up	1.29758e-06	0.000221685
2495	FTH1	ferritin, heavy polypeptide 1	12.197	12.2048	12.1752	12.0395	12.0449	12.0411	-1.10995	-0.1505	1.10995	down	1.4659e-06	0.000244364
1281	COL3A1	collagen, type III, alpha 1	11.1503	11.2105	11.2459	11.4043	11.3856	11.4166	1.14867	0.199963	1.14867	up	1.50396e-06	0.000249651
3397	ID1	inhibitor of DNA binding 1, dominant negative helix-loop-helix protein	9.70731	9.7034	9.72119	9.35326	9.42658	9.51468	-1.21346	-0.279127	1.21346	down	1.5536e-06	0.000255733
121457	IKBIP	IKBKB interacting protein	8.38558	8.33079	8.35649	8.63412	8.62251	8.59043	1.19588	0.258067	1.19588	up	1.60028e-06	0.000259081
2300	FOXL1	forkhead box L1	9.77982	9.79408	9.79069	9.49509	9.5642	9.59987	-1.17702	-0.235143	1.17702	down	1.6366e-06	0.000261729
5507	PPP1R3C	protein phosphatase 1 regulatory subunit 3C	10.1643	10.2058	10.175	10.3468	10.4067	10.3989	1.15064	0.202433	1.15064	up	1.68005e-06	0.000266511
5669	PSG1	pregnancy specific beta-1-glycoprotein 1	8.50205	8.41187	8.54208	8.74632	8.77546	8.81656	1.22613	0.294113	1.22613	up	1.77585e-06	0.000279454
440533	PSG8	pregnancy specific beta-1-glycoprotein 8	8.50205	8.41187	8.54208	8.74632	8.77546	8.81656	1.22613	0.294113	1.22613	up	1.77585e-06	0.000279454
65983	GRAMD3	GRAM domain containing 3	8.51776	8.53714	8.56175	8.81805	8.77569	8.76427	1.18684	0.24712	1.18684	up	1.89927e-06	0.000295333
6678	SPARC	secreted protein, acidic, cysteine-rich (osteonectin)	12.1613	12.2104	12.214	12.3361	12.3668	12.3653	1.11795	0.160857	1.11795	up	1.95499e-06	0.000302801
26227	PHGDH	phosphoglycerate dehydrogenase	8.59398	8.65173	8.59249	8.83945	8.94632	8.87016	1.20796	0.272577	1.20796	up	1.9963e-06	0.000307986
1604	CD55	CD55 molecule, decay accelerating factor for complement (Cromer blood group)	7.8673	7.90638	7.92101	8.1606	8.15854	8.20491	1.21121	0.276453	1.21121	up	2.02868e-06	0.000310546
10267	RAMP1	receptor (G protein-coupled) activity modifying protein 1	8.37381	8.33354	8.38768	8.57799	8.68033	8.68608	1.21683	0.283123	1.21683	up	2.12332e-06	0.000318831
11167	FSTL1	follistatin like 1	10.8726	10.948	10.9474	11.0914	11.126	11.1432	1.14674	0.197537	1.14674	up	2.2496e-06	0.000332712
57724	EPG5	ectopic P-granules autophagy protein 5 homolog (C. elegans)	9.4158	9.42243	9.44077	9.6025	9.69713	9.65931	1.17011	0.226647	1.17011	up	2.29561e-06	0.000338245
255488	RNF144B	ring finger protein 144B	6.30863	6.25193	6.20854	6.67998	6.61471	6.6565	1.31406	0.39403	1.31406	up	2.31419e-06	0.000338448
4929	NR4A2	nuclear receptor subfamily 4 group A member 2	5.80691	5.78463	5.69552	5.34102	5.27	5.23334	-1.39561	-0.4809	1.39561	down	2.37848e-06	0.000345284
257194	NEGR1	neuronal growth regulator 1	7.25678	7.21011	7.38321	7.73074	7.6126	7.65019	1.30237	0.381143	1.30237	up	2.47062e-06	0.000356053
4144	MAT2A	methionine adenosyltransferase II, alpha	8.01521	8.04854	8.059	7.72555	7.80187	7.75015	-1.21565	-0.281727	1.21565	down	2.75652e-06	0.000392914
9553	MRPL33	mitochondrial ribosomal protein L33	9.10532	9.09089	9.13071	9.36442	9.2882	9.37331	1.17528	0.233003	1.17528	up	2.87131e-06	0.000404076
3488	IGFBP5	insulin like growth factor binding protein 5	7.51989	7.58465	7.52267	7.81885	7.84286	7.95947	1.25817	0.331323	1.25817	up	2.87591e-06	0.000404076
114793	FMNL2	formin like 2	8.37787	8.36002	8.46271	8.08923	8.09715	8.15873	-1.21855	-0.285163	1.21855	down	2.90599e-06	0.000405488
7295	TXN	thioredoxin	12.4994	12.5114	12.5345	12.3701	12.3856	12.3687	-1.10215	-0.140317	1.10215	down	2.92188e-06	0.000405488
115701	ALPK2	alpha kinase 2	9.65438	9.58517	9.65928	9.82738	9.84391	9.89993	1.16807	0.22413	1.16807	up	3.05292e-06	0.000418484
168667	BMPER	BMP binding endothelial regulator	8.22107	8.17124	8.27509	8.45746	8.50736	8.53952	1.21334	0.27898	1.21334	up	3.08819e-06	0.00042039
8650	NUMB	numb homolog (Drosophila)	7.2162	7.12819	7.09078	6.80619	6.58347	6.73786	-1.35274	-0.435883	1.35274	down	3.11936e-06	0.000423168
4189	DNAJB9	DnaJ heat shock protein family (Hsp40) member B9	8.96778	9.03551	9.04291	9.24948	9.22028	9.27137	1.17417	0.231643	1.17417	up	3.14654e-06	0.000423931
2651	GCNT2	glucosaminyl (N-acetyl) transferase 2, I-branching enzyme (I blood group)	7.15831	7.18932	7.11894	7.48229	7.44922	7.45975	1.23819	0.30823	1.23819	up	3.21512e-06	0.000427318
3487	IGFBP4	insulin like growth factor binding protein 4	11.1776	11.1934	11.2218	11.3433	11.3595	11.3981	1.12456	0.169367	1.12456	up	3.33737e-06	0.000436198
1827	RCAN1	regulator of calcineurin 1	9.46213	9.50477	9.48658	9.65887	9.71165	9.76715	1.17126	0.228063	1.17126	up	3.39548e-06	0.000439549
221303	FAM162B	family with sequence similarity 162 member B	7.81553	7.83269	7.88589	7.46028	7.58482	7.54372	-1.2441	-0.315097	1.2441	down	3.41342e-06	0.000440286
4130	MAP1A	microtubule associated protein 1A	9.81503	9.81603	9.79943	9.96597	10.0425	10.0238	1.14917	0.200597	1.14917	up	3.46526e-06	0.000445512
2925	GRPR	gastrin releasing peptide receptor	6.17152	6.19787	6.25424	6.5339	6.6522	6.73711	1.35022	0.433193	1.35022	up	3.53958e-06	0.000453586
55296	TBC1D19	TBC1 domain family member 19	8.37537	8.36978	8.43209	8.60038	8.66464	8.68447	1.19534	0.257417	1.19534	up	3.60005e-06	0.000457847
81624	DIAPH3	diaphanous related formin 3	7.20758	7.11375	7.23193	7.52926	7.47155	7.55769	1.26145	0.33508	1.26145	up	3.60775e-06	0.000457847
221710	SMIM13	small integral membrane protein 13	9.49278	9.53996	9.53423	9.70357	9.71586	9.75599	1.15094	0.202817	1.15094	up	3.8581e-06	0.000486479
157506	RDH10	retinol dehydrogenase 10 (all-trans)	9.47114	9.48037	9.477	9.65362	9.66207	9.67976	1.13996	0.18898	1.13996	up	3.97605e-06	0.00049975
29968	PSAT1	phosphoserine aminotransferase 1	8.0708	7.89567	8.09868	8.42782	8.31345	8.41793	1.2876	0.364683	1.2876	up	4.12074e-06	0.000516286
64750	SMURF2	SMAD specific E3 ubiquitin protein ligase 2	11.0305	11.057	11.0263	11.2317	11.1947	11.1801	1.12058	0.164243	1.12058	up	4.18777e-06	0.000521364
25802	LMOD1	leiomodin 1 (smooth muscle)	8.5109	8.53653	8.56183	8.72681	8.85378	8.8346	1.20467	0.268643	1.20467	up	4.20697e-06	0.000522103
5087	PBX1	pre-B-cell leukemia homeobox 1	5.22645	5.27412	5.30983	4.78723	4.75375	4.83593	-1.39265	-0.47783	1.39265	down	4.25057e-06	0.000525854
5329	PLAUR	plasminogen activator, urokinase receptor	7.39485	7.28059	7.39662	7.66041	7.65093	7.70882	1.2449	0.316033	1.2449	up	4.5893e-06	0.000560707
3575	IL7R	interleukin 7 receptor	7.13616	7.12072	7.27961	7.58508	7.47718	7.67331	1.31923	0.399693	1.31923	up	4.65243e-06	0.000564911
53918	PELO	pelota homolog (Drosophila)	10.428	10.5164	10.4521	10.6802	10.6386	10.6544	1.14253	0.192227	1.14253	up	4.7076e-06	0.000566788
3672	ITGA1	integrin alpha 1	6.97062	7.1093	7.13307	7.39616	7.41445	7.50695	1.29073	0.36819	1.29073	up	4.75467e-06	0.000570285
3679	ITGA7	integrin alpha 7	8.94104	8.94267	8.92859	9.16461	9.11541	9.21586	1.1711	0.22786	1.1711	up	4.79773e-06	0.000572489
3725	JUN	jun proto-oncogene	10.1111	10.1109	10.1226	9.94037	9.9195	9.95743	-1.12956	-0.175763	1.12956	down	5.00022e-06	0.000592511
54541	DDIT4	DNA damage inducible transcript 4	8.32647	8.30108	8.34337	8.53773	8.55644	8.56411	1.17212	0.22912	1.17212	up	5.15418e-06	0.000603484
6328	SCN3A	sodium channel, voltage gated, type III alpha subunit	6.13813	6.00383	6.09554	6.50433	6.43597	6.46947	1.31108	0.390757	1.31108	up	5.60736e-06	0.000641277
5339	PLEC	plectin	11.3531	11.3597	11.3923	11.1868	11.1942	11.2413	-1.118	-0.160923	1.118	down	6.05486e-06	0.000688451
10129	FRY	FRY microtubule binding protein	7.8133	7.84113	7.8619	8.08123	8.12488	8.07147	1.1923	0.25375	1.1923	up	6.21413e-06	0.000704525
7763	ZFAND5	zinc finger, AN1-type domain 5	7.37655	7.34122	7.36562	7.65329	7.60478	7.7458	1.23698	0.306827	1.23698	up	6.55368e-06	0.000738288
10983	CCNI	cyclin I	10.5051	10.5012	10.5653	10.3709	10.321	10.3334	-1.13455	-0.182123	1.13455	down	6.62286e-06	0.000742308
6541	SLC7A1	solute carrier family 7 (cationic amino acid transporter, y+ system), member 1	7.59339	7.67178	7.58715	7.91094	7.86465	7.89759	1.20884	0.27362	1.20884	up	6.80752e-06	0.000758682
84679	SLC9A7	solute carrier family 9, subfamily A (NHE7, cation proton antiporter 7), member 7	6.87701	6.95405	6.78321	7.20986	7.19321	7.27355	1.2782	0.354117	1.2782	up	6.95649e-06	0.000773094
1647	GADD45A	growth arrest and DNA damage inducible alpha	11.1219	11.1182	11.1466	11.3049	11.2512	11.3138	1.11809	0.161037	1.11809	up	6.98561e-06	0.000773918
9448	MAP4K4	mitogen-activated protein kinase kinase kinase kinase 4	9.20221	9.24709	9.27409	9.4119	9.48003	9.47057	1.15913	0.213037	1.15913	up	7.00325e-06	0.000773918
3417	IDH1	isocitrate dehydrogenase 1 (NADP+)	10.1156	10.0691	10.1005	9.88145	9.89911	9.94592	-1.13778	-0.186217	1.13778	down	7.10227e-06	0.000778302
6495	SIX1	SIX homeobox 1	7.80601	7.75647	7.81142	7.46078	7.53495	7.54142	-1.21328	-0.278917	1.21328	down	7.08696e-06	0.000778302
1455	CSNK1G2	casein kinase 1, gamma 2	9.26708	9.25065	9.22068	9.00087	9.05385	9.06159	-1.15458	-0.207367	1.15458	down	7.33266e-06	0.000794695
813	CALU	calumenin	11.374	11.4442	11.4531	11.5845	11.5783	11.6398	1.13062	0.17711	1.13062	up	7.3118e-06	0.000794695
65108	MARCKSL1	MARCKS-like 1	10.9385	10.9285	10.9405	10.7865	10.7924	10.7863	-1.10758	-0.147407	1.10758	down	7.46753e-06	0.000807088
3037	HAS2	hyaluronan synthase 2	9.08823	9.07059	9.09184	8.88731	8.72994	8.85197	-1.19788	-0.26048	1.19788	down	7.50692e-06	0.000809122
5351	PLOD1	procollagen-lysine, 2-oxoglutarate 5-dioxygenase 1	10.4155	10.4035	10.4528	10.6164	10.5666	10.6009	1.12556	0.170643	1.12556	up	7.5537e-06	0.000811941
54737	MPHOSPH8	M-phase phosphoprotein 8	8.68559	8.67228	8.68927	8.86148	8.98738	8.91326	1.17962	0.238327	1.17962	up	8.29005e-06	0.000874367
64123	ADGRL4	adhesion G protein-coupled receptor L4	7.54528	7.55982	7.58979	7.84225	7.79588	7.82801	1.19506	0.257083	1.19506	up	8.76723e-06	0.0009145
6617	SNAPC1	small nuclear RNA activating complex polypeptide 1	8.12269	8.24448	8.251	8.52944	8.42888	8.50895	1.21675	0.283033	1.21675	up	8.75679e-06	0.0009145
3029	HAGH	hydroxyacylglutathione hydrolase	8.85815	8.84682	8.89605	9.10095	9.03755	9.09542	1.15746	0.210967	1.15746	up	9.12027e-06	0.000939174
51430	SUCO	SUN domain containing ossification factor	9.15825	9.11069	9.15949	9.35267	9.3136	9.35244	1.14612	0.19676	1.14612	up	9.10097e-06	0.000939174
54858	PGPEP1	pyroglutamyl-peptidase I	6.75696	6.87547	6.86022	7.12092	7.16784	7.17194	1.25065	0.322683	1.25065	up	9.30277e-06	0.000947311
5205	ATP8B1	ATPase, aminophospholipid transporter, class I, type 8B, member 1	10.4367	10.5308	10.5877	10.7218	10.7277	10.7598	1.16312	0.218003	1.16312	up	9.31876e-06	0.000947311
10370	CITED2	Cbp/p300-interacting transactivator, with Glu/Asp rich carboxy-terminal domain, 2	11.8147	11.9009	11.943	12.1258	12.037	12.1197	1.15505	0.207957	1.15505	up	9.56019e-06	0.000961911
1284	COL4A2	collagen, type IV, alpha 2	10.6281	10.6409	10.6482	10.7871	10.7918	10.7808	1.10767	0.147523	1.10767	up	9.96296e-06	0.00098978
135228	CD109	CD109 molecule	10.6935	10.6819	10.7158	10.543	10.5373	10.5541	-1.1113	-0.152243	1.1113	down	1.01197e-05	0.000992815
8502	PKP4	plakophilin 4	6.10029	6.11237	6.01086	6.41815	6.56522	6.42086	1.31364	0.39357	1.31364	up	1.0087e-05	0.000992815
1843	DUSP1	dual specificity phosphatase 1	9.60701	9.57561	9.59786	9.73667	9.80445	9.80878	1.14061	0.189807	1.14061	up	1.01163e-05	0.000992815
65062	TMEM237	transmembrane protein 237	8.75354	8.75413	8.77488	8.94971	8.94581	8.99366	1.15046	0.20221	1.15046	up	1.0167e-05	0.000994974
29995	LMCD1	LIM and cysteine-rich domains 1	7.60046	7.60936	7.74704	7.90769	7.97974	7.97226	1.23195	0.300943	1.23195	up	1.02742e-05	0.0010014
3107	HLA-C	major histocompatibility complex, class I, C	11.5835	11.6242	11.6009	11.4099	11.4653	11.4731	-1.11222	-0.153443	1.11222	down	1.07309e-05	0.00103625
2246	FGF1	fibroblast growth factor 1 (acidic)	7.04777	7.19377	7.12895	7.38076	7.4771	7.5166	1.26108	0.334657	1.26108	up	1.07888e-05	0.00103775
23423	TMED3	transmembrane p24 trafficking protein 3	11.5775	11.5608	11.5626	11.6949	11.7138	11.6905	1.09641	0.13279	1.09641	up	1.08332e-05	0.00103948
6575	SLC20A2	solute carrier family 20 (phosphate transporter), member 2	8.0106	7.98624	8.04904	8.2022	8.34747	8.34183	1.21577	0.281873	1.21577	up	1.09655e-05	0.00104707
2335	FN1	fibronectin 1	10.3771	10.3562	10.3901	10.5051	10.5533	10.591	1.1292	0.175303	1.1292	up	1.11899e-05	0.00106566
831	CAST	calpastatin	4.79464	4.77818	4.77523	5.27509	5.14155	5.35722	1.39018	0.47527	1.39018	up	1.13546e-05	0.00107639
6591	SNAI2	snail family zinc finger 2	11.2815	11.2798	11.3135	11.1545	11.1248	11.1601	-1.10587	-0.14518	1.10587	down	1.14062e-05	0.00107868
80723	SLC35G2	solute carrier family 35 member G2	8.56554	8.6839	8.68824	8.84439	9.01693	8.96161	1.22696	0.295083	1.22696	up	1.16388e-05	0.00109541
59	ACTA2	actin, alpha 2, smooth muscle, aorta	11.6178	11.688	11.7672	11.9081	11.8703	12.0015	1.17744	0.23565	1.17744	up	1.19133e-05	0.00111591
6925	TCF4	transcription factor 4	8.69098	8.72982	8.74435	8.48362	8.53746	8.50267	-1.15974	-0.2138	1.15974	down	1.20114e-05	0.00111976
100129518	LOC100129518	uncharacterized LOC100129518	7.6979	7.7491	7.7696	8.1732	7.9679	8.03115	1.24708	0.31855	1.24708	up	1.22267e-05	0.00113339
6648	SOD2	superoxide dismutase 2, mitochondrial	7.6979	7.7491	7.7696	8.1732	7.9679	8.03115	1.24708	0.31855	1.24708	up	1.22267e-05	0.00113339
57157	PHTF2	putative homeodomain transcription factor 2	9.93452	9.93927	9.96161	10.1322	10.0883	10.1113	1.12151	0.165447	1.12151	up	1.23639e-05	0.00113647
23705	CADM1	cell adhesion molecule 1	8.13039	8.15878	8.19682	8.39667	8.36853	8.49866	1.19689	0.25929	1.19689	up	1.26385e-05	0.00115367
4086	SMAD1	SMAD family member 1	8.11864	8.20396	8.19387	7.94375	7.76954	7.90355	-1.23104	-0.299877	1.23104	down	1.3233e-05	0.00119018
10335	MRVI1	murine retrovirus integration site 1 homolog	8.10084	8.09069	8.06945	8.27876	8.32246	8.33116	1.16781	0.2238	1.16781	up	1.32508e-05	0.00119018
57448	BIRC6	baculoviral IAP repeat containing 6	7.36047	7.45988	7.44824	7.65301	7.78424	7.72294	1.22876	0.2972	1.22876	up	1.32177e-05	0.00119018
6929	TCF3	transcription factor 3	8.49702	8.5056	8.57436	8.25926	8.30815	8.31872	-1.17307	-0.230283	1.17307	down	1.33359e-05	0.00119238
2896	GRN	granulin	9.48479	9.41831	9.41616	9.19237	9.25515	9.26053	-1.15168	-0.203737	1.15168	down	1.34348e-05	0.0011985
2297	FOXD1	forkhead box D1	10.784	10.7942	10.8217	10.659	10.6426	10.6564	-1.10747	-0.147273	1.10747	down	1.37357e-05	0.00121981
10772	SRSF10	serine/arginine-rich splicing factor 10	7.49186	7.51101	7.56307	7.74346	7.79151	7.8697	1.21384	0.279577	1.21384	up	1.38531e-05	0.00122746
11096	ADAMTS5	ADAM metallopeptidase with thrombospondin type 1 motif 5	7.17118	7.25912	7.31452	7.56622	7.52812	7.73861	1.28584	0.36271	1.28584	up	1.3932e-05	0.00123169
6938	TCF12	transcription factor 12	9.12672	9.13773	9.07889	8.8725	8.86145	8.95601	-1.16295	-0.217793	1.16295	down	1.40199e-05	0.00123391
50804	MYEF2	myelin expression factor 2	6.69573	6.69662	6.71653	6.98392	7.01381	6.98173	1.2228	0.290193	1.2228	up	1.45694e-05	0.00127372
9241	NOG	noggin	8.31113	8.27049	8.23812	8.50224	8.7413	8.55313	1.25322	0.325643	1.25322	up	1.46206e-05	0.00127536
5631	PRPS1	phosphoribosyl pyrophosphate synthetase 1	9.99284	10.0525	10.0388	10.1639	10.2312	10.2628	1.14177	0.19127	1.14177	up	1.46555e-05	0.00127558
1960	EGR3	early growth response 3	6.33316	6.2204	6.25042	5.78422	5.85955	5.96346	-1.31852	-0.398917	1.31852	down	1.47172e-05	0.00127812
10424	PGRMC2	progesterone receptor membrane component 2	10.0082	10.0323	10.0439	10.1714	10.1874	10.2419	1.12669	0.172093	1.12669	up	1.49813e-05	0.0012925
9991	PTBP3	polypyrimidine tract binding protein 3	6.63192	6.41618	6.6386	7.01702	6.94665	6.91032	1.31564	0.395763	1.31564	up	1.49649e-05	0.0012925
2151	F2RL2	coagulation factor II (thrombin) receptor-like 2	9.24077	9.19383	9.29083	9.43254	9.42555	9.4908	1.15494	0.20782	1.15494	up	1.49215e-05	0.0012925
2752	GLUL	glutamate-ammonia ligase	9.4885	9.53269	9.54061	9.30133	9.32938	9.36547	-1.13961	-0.18854	1.13961	down	1.50286e-05	0.00129374
688	KLF5	Kruppel-like factor 5 (intestinal)	7.48775	7.54481	7.61569	7.77092	7.87947	7.94213	1.2438	0.314757	1.2438	up	1.50836e-05	0.00129465
64115	C10orf54	chromosome 10 open reading frame 54	6.87848	6.85539	6.76468	7.08762	7.17527	7.24333	1.26216	0.33589	1.26216	up	1.51257e-05	0.00129465
93649	MYOCD	myocardin	6.4955	6.53851	6.60759	6.86161	6.83621	6.95954	1.26452	0.338587	1.26452	up	1.52662e-05	0.00130279
9518	GDF15	growth differentiation factor 15	8.39619	8.49769	8.45731	8.62978	8.73902	8.77829	1.20189	0.2653	1.20189	up	1.54219e-05	0.00131323
100529241	HSPE1-MOB4	HSPE1-MOB4 readthrough	10.6709	10.6578	10.6851	10.5413	10.4141	10.4885	-1.14079	-0.190033	1.14079	down	1.57975e-05	0.00133588
7057	THBS1	thrombospondin 1	8.02115	8.08214	8.14061	8.38424	8.28016	8.36989	1.20036	0.263463	1.20036	up	1.58576e-05	0.00133588
3336	HSPE1	heat shock protein family E (Hsp10) member 1	10.6709	10.6578	10.6851	10.5413	10.4141	10.4885	-1.14079	-0.190033	1.14079	down	1.57975e-05	0.00133588
3778	KCNMA1	potassium channel, calcium activated large conductance subfamily M alpha, member 1	9.80168	9.7698	9.80177	9.54153	9.62642	9.63059	-1.14201	-0.19157	1.14201	down	1.59402e-05	0.00133996
1289	COL5A1	collagen, type V, alpha 1	9.11108	9.08248	9.16359	9.2897	9.32994	9.32649	1.14578	0.196327	1.14578	up	1.60216e-05	0.00134394
55002	TMCO3	transmembrane and coiled-coil domains 3	10.1976	10.1937	10.1834	10.3214	10.4187	10.362	1.12957	0.17578	1.12957	up	1.61747e-05	0.00134806
51226	COPZ2	coatomer protein complex subunit zeta 2	10.6495	10.664	10.7378	10.8265	10.8651	10.9028	1.13372	0.18107	1.13372	up	1.62421e-05	0.00134806
5264	PHYH	phytanoyl-CoA 2-hydroxylase	8.45708	8.56278	8.50846	8.30348	8.23636	8.28014	-1.17782	-0.236113	1.17782	down	1.61852e-05	0.00134806
79770	TXNDC15	thioredoxin domain containing 15	8.33456	8.382	8.35795	8.54537	8.62423	8.56232	1.16404	0.219137	1.16404	up	1.68041e-05	0.00139177
6038	RNASE4	ribonuclease, RNase A family, 4	8.103	8.06538	8.14401	7.86542	7.8956	7.83188	-1.18085	-0.23983	1.18085	down	1.70227e-05	0.00140185
55970	GNG12	guanine nucleotide binding protein (G protein), gamma 12	9.64745	9.74542	9.7311	9.92421	9.87343	9.90827	1.14392	0.19398	1.14392	up	1.70327e-05	0.00140185
153642	ARSK	arylsulfatase family member K	8.42885	8.44684	8.48754	8.73301	8.61671	8.73747	1.18207	0.24132	1.18207	up	1.73416e-05	0.00142429
25798	BRI3	brain protein I3	10.4082	10.4279	10.4695	10.2721	10.2637	10.2921	-1.11671	-0.15925	1.11671	down	1.77391e-05	0.00144787
10082	GPC6	glypican 6	9.50066	9.48205	9.53	9.32876	9.30102	9.34704	-1.13181	-0.17863	1.13181	down	1.8095e-05	0.00147082
79827	CLMP	CXADR-like membrane protein	8.87048	8.93418	8.97013	9.11883	9.11659	9.17274	1.15759	0.211123	1.15759	up	1.82222e-05	0.00147811
23042	PDXDC1	pyridoxal-dependent decarboxylase domain containing 1	4.38925	4.54657	4.47343	4.90413	4.93534	4.92546	1.36783	0.451893	1.36783	up	1.885e-05	0.001514
6281	S100A10	S100 calcium binding protein A10	11.6653	11.7135	11.7378	11.5387	11.5441	11.586	-1.109	-0.14926	1.109	down	1.93803e-05	0.0015434
10970	CKAP4	cytoskeleton-associated protein 4	11.4235	11.4675	11.464	11.5851	11.5762	11.5942	1.09698	0.133533	1.09698	up	1.93625e-05	0.0015434
2590	GALNT2	polypeptide N-acetylgalactosaminyltransferase 2	8.99714	9.05145	9.0196	9.19228	9.26508	9.2008	1.14604	0.196657	1.14604	up	1.94251e-05	0.00154385
6472	SHMT2	serine hydroxymethyltransferase 2 (mitochondrial)	8.96061	8.99191	9.03115	9.15248	9.20813	9.22132	1.14824	0.19942	1.14824	up	1.96971e-05	0.00155292
3815	KIT	v-kit Hardy-Zuckerman 4 feline sarcoma viral oncogene homolog	8.11513	8.10091	8.18572	8.32118	8.38525	8.41068	1.17972	0.23845	1.17972	up	1.96768e-05	0.00155292
85028	SNHG12	small nucleolar RNA host gene 12	8.97198	8.95621	8.96326	9.13109	9.1323	9.18229	1.13661	0.184743	1.13661	up	1.99749e-05	0.00157166
6546	SLC8A1	solute carrier family 8 (sodium/calcium exchanger), member 1	7.89918	7.89558	8.00769	8.22301	8.15892	8.17627	1.19079	0.251917	1.19079	up	2.02211e-05	0.001583
1462	VCAN	versican	9.97867	10.0235	10.0614	9.84322	9.74715	9.85873	-1.15253	-0.204807	1.15253	down	2.13011e-05	0.00165533
3398	ID2	inhibitor of DNA binding 2, dominant negative helix-loop-helix protein	10.0133	10.0164	10.066	9.8785	9.85893	9.87212	-1.11887	-0.162043	1.11887	down	2.13327e-05	0.00165533
9830	TRIM14	tripartite motif containing 14	8.09368	8.18346	8.14662	7.94909	7.87448	7.86365	-1.18551	-0.245513	1.18551	down	2.12847e-05	0.00165533
7071	KLF10	Kruppel-like factor 10	9.51387	9.56989	9.648	9.3611	9.21731	9.3703	-1.19832	-0.261017	1.19832	down	2.21106e-05	0.00170209
27286	SRPX2	sushi-repeat containing protein, X-linked 2	8.39928	8.37295	8.29378	8.5345	8.62154	8.63368	1.18201	0.241237	1.18201	up	2.22977e-05	0.00170997
4856	NOV	nephroblastoma overexpressed	8.09812	8.06835	8.12331	7.75217	7.68569	7.91488	-1.24173	-0.312347	1.24173	down	2.2563e-05	0.00172695
3958	LGALS3	lectin, galactoside-binding, soluble, 3	12.6816	12.6694	12.6883	12.534	12.564	12.5833	-1.08625	-0.119353	1.08625	down	2.26607e-05	0.00173106
3776	KCNK2	potassium channel, two pore domain subfamily K, member 2	7.1359	7.05261	7.12885	7.37323	7.3781	7.36498	1.20273	0.266317	1.20273	up	2.30147e-05	0.00175469
4016	LOXL1	lysyl oxidase like 1	10.9114	10.8596	10.8472	10.6974	10.7303	10.7341	-1.11122	-0.15214	1.11122	down	2.35011e-05	0.00178034
1728	NQO1	NAD(P)H dehydrogenase, quinone 1	11.7348	11.7902	11.8224	11.5931	11.633	11.6544	-1.11392	-0.155647	1.11392	down	2.41174e-05	0.00181069
6675	UAP1	UDP-N-acetylglucosamine pyrophosphorylase 1	9.58289	9.48551	9.56197	9.72636	9.74324	9.71534	1.1367	0.184857	1.1367	up	2.45607e-05	0.00183348
8140	SLC7A5	solute carrier family 7 (amino acid transporter light chain, L system), member 5	7.84804	7.84628	7.88507	8.04965	8.09103	8.10843	1.16735	0.22324	1.16735	up	2.48509e-05	0.00184464
5476	CTSA	cathepsin A	11.3998	11.4429	11.4632	11.2437	11.2897	11.3154	-1.11139	-0.15236	1.11139	down	2.56178e-05	0.00189086
29997	GLTSCR2	glioma tumor suppressor candidate region gene 2	11.0067	10.9906	10.9667	10.7889	10.8606	10.8536	-1.11234	-0.1536	1.11234	down	2.58206e-05	0.00189875
800	CALD1	caldesmon 1	11.2129	11.2749	11.2147	11.3536	11.3894	11.4345	1.116	0.158337	1.116	up	2.60522e-05	0.00190506
387758	FIBIN	fin bud initiation factor homolog (zebrafish)	8.1869	8.18797	8.24298	8.48764	8.3735	8.55858	1.20354	0.26729	1.20354	up	2.60069e-05	0.00190506
1282	COL4A1	collagen, type IV, alpha 1	9.01681	8.9723	9.0472	9.18157	9.19116	9.2344	1.14098	0.190273	1.14098	up	2.65827e-05	0.00193665
54602	NDFIP2	Nedd4 family interacting protein 2	9.51253	9.48902	9.54766	9.84164	9.65679	9.76074	1.17826	0.236653	1.17826	up	2.67334e-05	0.00194044
81832	NETO1	neuropilin and tolloid like 1	5.82889	5.99591	5.98967	6.34799	6.24305	6.45875	1.33032	0.411773	1.33032	up	2.69671e-05	0.00194663
22990	PCNX	pecanex homolog (Drosophila)	6.03485	5.97395	6.13528	6.4384	6.38006	6.37692	1.27494	0.350433	1.27494	up	2.75536e-05	0.00198169
64839	FBXL17	F-box and leucine-rich repeat protein 17	6.79652	6.83983	6.84641	7.177	7.05951	7.11041	1.22099	0.288053	1.22099	up	2.81788e-05	0.00201928
7474	WNT5A	wingless-type MMTV integration site family member 5A	9.48674	9.5647	9.56899	9.68125	9.76219	9.8021	1.15538	0.20837	1.15538	up	2.88621e-05	0.002057
7412	VCAM1	vascular cell adhesion molecule 1	8.26529	8.3075	8.3625	8.50048	8.55116	8.52836	1.16063	0.214903	1.16063	up	2.99885e-05	0.00212572
2200	FBN1	fibrillin 1	10.1858	10.1798	10.1795	10.3521	10.3006	10.3365	1.10806	0.148037	1.10806	up	3.01296e-05	0.00213189
7164	TPD52L1	tumor protein D52-like 1	8.1396	8.22923	8.08719	8.35546	8.40545	8.43098	1.18533	0.24529	1.18533	up	3.02219e-05	0.00213457
3915	LAMC1	laminin subunit gamma 1	10.3069	10.309	10.3172	10.4571	10.4441	10.4469	1.10064	0.138347	1.10064	up	3.02876e-05	0.00213459
9353	SLIT2	slit guidance ligand 2	7.8258	7.76447	7.79634	8.03044	7.99966	8.01689	1.16484	0.220127	1.16484	up	3.05824e-05	0.00214464
6926	TBX3	T-box 3	8.75364	8.75757	8.81159	8.5677	8.59562	8.58458	-1.14206	-0.191633	1.14206	down	3.07534e-05	0.00214516
5793	PTPRG	protein tyrosine phosphatase, receptor type, G	5.15813	5.03289	5.00243	5.46909	5.64986	5.42784	1.36709	0.451113	1.36709	up	3.07514e-05	0.00214516
4192	MDK	midkine (neurite growth-promoting factor 2)	10.2268	10.2116	10.2262	9.9769	10.0609	10.0909	-1.13182	-0.17865	1.13182	down	3.07235e-05	0.00214516
4052	LTBP1	latent transforming growth factor beta binding protein 1	10.4884	10.5885	10.5417	10.6819	10.7657	10.7065	1.13172	0.17852	1.13172	up	3.09983e-05	0.00215841
2627	GATA6	GATA binding protein 6	5.98471	6.00878	6.26508	6.50568	6.50412	6.48824	1.3316	0.413157	1.3316	up	3.13963e-05	0.00218227
8702	B4GALT4	UDP-Gal:betaGlcNAc beta 1,4- galactosyltransferase, polypeptide 4	7.70523	7.74184	7.74208	8.02409	7.99968	7.90205	1.18555	0.245557	1.18555	up	3.19518e-05	0.00221306
1847	DUSP5	dual specificity phosphatase 5	9.33381	9.35483	9.39618	9.5366	9.51293	9.54533	1.12507	0.170013	1.12507	up	3.22567e-05	0.00222633
57045	TWSG1	twisted gastrulation BMP signaling modulator 1	10.4321	10.4423	10.4574	10.577	10.5693	10.6266	1.10725	0.146987	1.10725	up	3.25766e-05	0.00224365
5274	SERPINI1	serpin peptidase inhibitor, clade I (neuroserpin), member 1	8.15734	8.15442	8.11751	8.4526	8.33167	8.34265	1.17491	0.23255	1.17491	up	3.27148e-05	0.00224365
133022	TRAM1L1	translocation associated membrane protein 1-like 1	6.80603	6.81752	6.82038	6.47292	6.53634	6.56445	-1.2227	-0.290073	1.2227	down	3.27511e-05	0.00224365
5026	P2RX5	purinergic receptor P2X, ligand gated ion channel, 5	7.36901	7.40457	7.33554	7.5738	7.70114	7.62543	1.2006	0.26375	1.2006	up	3.32958e-05	0.00227411
55269	PSPC1	paraspeckle component 1	9.33678	9.38273	9.32207	9.1612	9.09387	9.19834	-1.14556	-0.196057	1.14556	down	3.37506e-05	0.00230118
3615	IMPDH2	IMP (inosine 5'-monophosphate) dehydrogenase 2	11.5027	11.4961	11.4696	11.3572	11.3825	11.3463	-1.09239	-0.127483	1.09239	down	3.39568e-05	0.00231124
5757	PTMA	prothymosin, alpha	12.7446	12.7341	12.756	12.6588	12.6067	12.6208	-1.08383	-0.116133	1.08383	down	3.41397e-05	0.00231701
728026	LOC728026	prothymosin alpha-like	12.7446	12.7341	12.756	12.6588	12.6067	12.6208	-1.08383	-0.116133	1.08383	down	3.41397e-05	0.00231701
4008	LMO7	LIM domain 7	10.0279	10.0222	10.0511	10.1785	10.1668	10.1908	1.10572	0.14498	1.10572	up	3.54898e-05	0.00238668
6697	SPR	sepiapterin reductase (7,8-dihydrobiopterin:NADP+ oxidoreductase)	8.94042	8.93742	8.88125	8.72096	8.76307	8.6681	-1.15055	-0.20232	1.15055	down	3.54735e-05	0.00238668
10905	MAN1A2	mannosidase, alpha, class 1A, member 2	8.33929	8.45222	8.50604	8.69856	8.67108	8.65157	1.18199	0.24122	1.18199	up	3.55827e-05	0.00238884
64420	SUSD1	sushi domain containing 1	7.1589	7.18375	7.1788	7.44095	7.41241	7.39653	1.1833	0.242813	1.1833	up	3.58215e-05	0.00239425
730755	KRTAP2-3	keratin associated protein 2-3	8.58847	8.62386	8.69876	8.81509	8.84702	8.88568	1.15848	0.212233	1.15848	up	3.57967e-05	0.00239425
7485	WRB	tryptophan rich basic protein	10.063	10.0848	10.1069	10.3665	10.2163	10.2678	1.14759	0.198607	1.14759	up	3.58459e-05	0.00239425
57415	C3orf14	chromosome 3 open reading frame 14	8.51389	8.50418	8.51419	8.22633	8.21735	8.36722	-1.18136	-0.240453	1.18136	down	3.6558e-05	0.00243355
3682	ITGAE	integrin alpha E	10.5125	10.5813	10.5793	10.691	10.7057	10.7388	1.11275	0.154123	1.11275	up	3.66797e-05	0.00243712
117581	TWIST2	twist family bHLH transcription factor 2	8.86483	8.83467	8.85037	8.69541	8.6653	8.61453	-1.14198	-0.191543	1.14198	down	3.67355e-05	0.00243712
4306	NR3C2	nuclear receptor subfamily 3 group C member 2	5.78751	5.75931	5.69002	6.01808	6.15029	6.14397	1.28209	0.3585	1.28209	up	3.73692e-05	0.00246846
221468	TMEM217	transmembrane protein 217	6.02837	6.03716	5.8916	6.38763	6.29472	6.32077	1.27338	0.348663	1.27338	up	3.78673e-05	0.0024912
9890	PLPPR4	phospholipid phosphatase related 4	7.36462	7.32703	7.4301	7.57835	7.64692	7.66747	1.19499	0.256997	1.19499	up	3.95448e-05	0.00257999
8660	IRS2	insulin receptor substrate 2	8.1017	8.0859	8.09543	8.35046	8.27512	8.28045	1.15482	0.207667	1.15482	up	4.01936e-05	0.00260954
1026	CDKN1A	cyclin-dependent kinase inhibitor 1A (p21, Cip1)	12.3504	12.3497	12.3393	12.4798	12.4322	12.4723	1.08292	0.114923	1.08292	up	4.02797e-05	0.00261062
316	AOX1	aldehyde oxidase 1	8.38154	8.38558	8.41528	8.53706	8.65911	8.70372	1.18031	0.239163	1.18031	up	4.04997e-05	0.00261587
83468	GLT8D2	glycosyltransferase 8 domain containing 2	9.44719	9.49997	9.48585	9.64142	9.61672	9.69456	1.12758	0.17323	1.12758	up	4.06421e-05	0.00261686
7494	XBP1	X-box binding protein 1	9.52681	9.6497	9.59332	9.75366	9.78447	9.79305	1.13849	0.187117	1.13849	up	4.07623e-05	0.00262031
23474	ETHE1	ethylmalonic encephalopathy 1	9.15576	9.18968	9.24468	9.37649	9.35405	9.44512	1.14487	0.19518	1.14487	up	4.08809e-05	0.00262364
72	ACTG2	actin, gamma 2, smooth muscle, enteric	10.758	10.837	10.8224	11.0925	10.9242	11.0247	1.15507	0.207983	1.15507	up	4.1067e-05	0.0026313
5366	PMAIP1	phorbol-12-myristate-13-acetate-induced protein 1	9.12063	9.17833	9.19415	9.49606	9.32684	9.36646	1.17453	0.232083	1.17453	up	4.12779e-05	0.00263502
7070	THY1	Thy-1 cell surface antigen	11.9932	11.9881	11.9869	12.0921	12.0927	12.1249	1.08211	0.113853	1.08211	up	4.15613e-05	0.00264146
8519	IFITM1	interferon induced transmembrane protein 1	10.4037	10.3863	10.3657	10.1863	10.2738	10.218	-1.11666	-0.15919	1.11666	down	4.16767e-05	0.00264452
23704	KCNE4	potassium channel, voltage gated subfamily E regulatory beta subunit 4	7.12114	7.09225	7.18082	7.34475	7.4083	7.51779	1.22451	0.29221	1.22451	up	4.23692e-05	0.00267982
25957	PNISR	PNN-interacting serine/arginine-rich protein	7.6949	7.73308	7.83841	7.54436	7.39499	7.46916	-1.21922	-0.28596	1.21922	down	4.27537e-05	0.0026998
10379	IRF9	interferon regulatory factor 9	10.1404	10.1317	10.0556	9.86115	9.94676	9.95899	-1.13834	-0.186927	1.13834	down	4.37416e-05	0.00274456
10007	GNPDA1	glucosamine-6-phosphate deaminase 1	9.04565	9.01994	9.04387	8.81146	8.89499	8.85334	-1.13542	-0.183223	1.13542	down	4.42599e-05	0.00277266
25891	PAMR1	peptidase domain containing associated with muscle regeneration 1	9.70368	9.77121	9.7928	9.90214	9.9349	9.93423	1.12339	0.16786	1.12339	up	4.47356e-05	0.002798
10631	POSTN	periostin, osteoblast specific factor	7.99789	7.98509	8.0406	7.76143	7.81227	7.8052	-1.16062	-0.214893	1.16062	down	4.59943e-05	0.00285524
79690	GAL3ST4	galactose-3-O-sulfotransferase 4	9.26559	9.1652	9.26274	9.05714	9.01058	9.04614	-1.14332	-0.193223	1.14332	down	4.6127e-05	0.00285524
694	BTG1	B-cell translocation gene 1, anti-proliferative	10.4875	10.4962	10.5005	10.3357	10.3656	10.374	-1.09905	-0.13626	1.09905	down	4.60757e-05	0.00285524
163	AP2B1	adaptor-related protein complex 2, beta 1 subunit	9.32965	9.40055	9.39027	9.5307	9.52842	9.58817	1.12944	0.175607	1.12944	up	4.6592e-05	0.002873
3592	IL12A	interleukin 12A	7.85704	7.83305	7.94031	8.11264	8.19252	8.06713	1.18698	0.247297	1.18698	up	4.71549e-05	0.00289862
5184	PEPD	peptidase D	8.95963	9.01368	8.97418	8.75062	8.81469	8.82269	-1.138	-0.186497	1.138	down	4.79607e-05	0.00292161
23127	COLGALT2	collagen beta(1-O)galactosyltransferase 2	6.81721	6.76543	6.88214	7.09433	7.12197	7.07001	1.20902	0.273843	1.20902	up	4.78377e-05	0.00292161
81029	WNT5B	wingless-type MMTV integration site family member 5B	7.98334	8.02107	8.01362	8.15807	8.27774	8.2619	1.17004	0.22656	1.17004	up	4.77634e-05	0.00292161
79627	OGFRL1	opioid growth factor receptor-like 1	6.16872	6.23405	6.23368	6.60847	6.46544	6.518	1.24702	0.318487	1.24702	up	4.80663e-05	0.00292268
5167	ENPP1	ectonucleotide pyrophosphatase/phosphodiesterase 1	7.12286	7.20639	7.29936	7.47815	7.47822	7.50126	1.21112	0.27634	1.21112	up	4.82048e-05	0.00292656
338773	TMEM119	transmembrane protein 119	7.7117	7.69701	7.69935	7.47312	7.50925	7.46261	-1.16556	-0.221027	1.16556	down	4.82788e-05	0.00292656
1955	MEGF9	multiple EGF-like-domains 9	8.06994	8.11198	8.13854	8.31112	8.44062	8.29435	1.18253	0.241877	1.18253	up	4.85415e-05	0.00293387
222865	TMEM130	transmembrane protein 130	5.42504	5.42819	5.54311	5.7748	5.81984	5.92311	1.29576	0.373803	1.29576	up	4.85486e-05	0.00293387
23016	EXOSC7	exosome component 7	7.61563	7.64139	7.64476	7.80937	7.98372	7.88544	1.19658	0.258917	1.19658	up	4.88838e-05	0.00294642
7123	CLEC3B	C-type lectin domain family 3, member B	7.61563	7.64139	7.64476	7.80937	7.98372	7.88544	1.19658	0.258917	1.19658	up	4.88838e-05	0.00294642
26524	LATS2	large tumor suppressor kinase 2	11.0303	11.003	11.0043	11.1181	11.1458	11.155	1.09209	0.12709	1.09209	up	4.93186e-05	0.0029622
6666	SOX12	SRY-box 12	9.32815	9.24783	9.26753	9.10493	9.12769	9.04169	-1.14055	-0.189733	1.14055	down	4.9633e-05	0.00297201
51166	AADAT	aminoadipate aminotransferase	6.86173	6.82599	6.95658	6.5989	6.61219	6.56205	-1.22297	-0.290387	1.22297	down	5.00367e-05	0.00299163
124540	MSI2	musashi RNA binding protein 2	5.27547	5.42312	5.60238	4.86838	5.06451	4.69009	-1.47358	-0.55933	1.47358	down	5.10908e-05	0.0030454
51031	GLOD4	glyoxalase domain containing 4	8.98028	9.02929	8.99376	8.78125	8.84616	8.83442	-1.13328	-0.1805	1.13328	down	5.155e-05	0.00306349
118881	COMTD1	catechol-O-methyltransferase domain containing 1	7.46752	7.50268	7.48617	7.14472	7.3034	7.20615	-1.20361	-0.267367	1.20361	down	5.16924e-05	0.00306731
5734	PTGER4	prostaglandin E receptor 4	8.04509	8.07559	8.0982	8.27659	8.30527	8.24298	1.15028	0.201987	1.15028	up	5.28835e-05	0.00312386
79960	JADE1	jade family PHD finger 1	5.45113	5.49246	5.34946	5.78565	5.74484	5.91757	1.30586	0.385003	1.30586	up	5.28452e-05	0.00312386
1201	CLN3	ceroid-lipofuscinosis, neuronal 3	9.15079	9.17249	9.13871	8.96646	8.98952	9.00771	-1.12202	-0.1661	1.12202	down	5.32508e-05	0.00313145
114769	CARD16	caspase recruitment domain family member 16	8.689	8.67994	8.63131	8.44943	8.41665	8.52059	-1.15231	-0.204527	1.15231	down	5.32008e-05	0.00313145
51309	ARMCX1	armadillo repeat containing, X-linked 1	9.96928	10.0368	10.0253	9.8695	9.82887	9.8632	-1.11466	-0.1566	1.11466	down	5.34061e-05	0.0031359
66008	TRAK2	trafficking protein, kinesin binding 2	10.0562	10.091	10.025	10.1914	10.1992	10.2429	1.11245	0.153747	1.11245	up	5.34897e-05	0.00313612
51313	FAM198B	family with sequence similarity 198 member B	7.9812	8.0193	7.99873	8.16882	8.22107	8.21037	1.14897	0.200343	1.14897	up	5.37496e-05	0.00314667
308	ANXA5	annexin A5	9.73416	9.75951	9.75635	9.6123	9.5856	9.60801	-1.10806	-0.148037	1.10806	down	5.44986e-05	0.00318105
7267	TTC3	tetratricopeptide repeat domain 3	9.1192	9.14015	9.19954	9.30914	9.3178	9.38187	1.13548	0.183307	1.13548	up	5.46858e-05	0.00318669
4000	LMNA	lamin A/C	9.40886	9.39526	9.40076	9.2439	9.2333	9.26312	-1.11331	-0.154853	1.11331	down	5.5404e-05	0.00321482
7052	TGM2	transglutaminase 2	7.15961	7.02656	7.19763	7.36115	7.45492	7.60508	1.27084	0.345783	1.27084	up	5.65809e-05	0.00327346
64801	ARV1	ARV1 homolog, fatty acid homeostasis modulator	8.78958	8.7688	8.82169	8.98782	8.94337	8.97241	1.12858	0.17451	1.12858	up	5.68183e-05	0.00328236
7745	ZKSCAN8	zinc finger with KRAB and SCAN domains 8	5.09661	5.13578	5.19922	4.61677	4.54188	4.85623	-1.38726	-0.472243	1.38726	down	5.71135e-05	0.00329117
23566	LPAR3	lysophosphatidic acid receptor 3	5.73395	5.68171	5.7119	5.3958	5.36983	5.35422	-1.26217	-0.335903	1.26217	down	5.76465e-05	0.00331076
25976	TIPARP	TCDD-inducible poly(ADP-ribose) polymerase	7.14011	7.31005	7.2307	7.43515	7.59091	7.55563	1.23138	0.300277	1.23138	up	5.80763e-05	0.00332792
2321	FLT1	fms-related tyrosine kinase 1	5.54418	5.47308	5.78794	5.98538	6.02556	6.08062	1.3461	0.428787	1.3461	up	5.9004e-05	0.00336195
23213	SULF1	sulfatase 1	6.38153	6.47776	6.52394	6.69595	6.83447	6.80509	1.24611	0.317427	1.24611	up	5.90505e-05	0.00336195
2273	FHL1	four and a half LIM domains 1	9.21409	9.19014	9.14435	9.32538	9.36563	9.36139	1.12345	0.16794	1.12345	up	6.09158e-05	0.00343289
10605	PAIP1	poly(A) binding protein interacting protein 1	9.24402	9.25855	9.28183	9.08921	9.12628	9.07931	-1.11977	-0.1632	1.11977	down	6.15638e-05	0.00345997
7291	TWIST1	twist family bHLH transcription factor 1	8.59932	8.58044	8.55754	8.3854	8.39062	8.41813	-1.13371	-0.18105	1.13371	down	6.18256e-05	0.00346973
2669	GEM	GTP binding protein overexpressed in skeletal muscle	7.00022	6.89349	7.00938	6.65285	6.68437	6.72606	-1.21414	-0.279937	1.21414	down	6.43579e-05	0.0036056
83641	FAM107B	family with sequence similarity 107 member B	7.28531	7.25687	7.33063	7.54487	7.4773	7.59712	1.18824	0.248827	1.18824	up	6.57035e-05	0.00366644
28962	OSTM1	osteopetrosis associated transmembrane protein 1	9.35436	9.33752	9.39304	9.52206	9.49577	9.58624	1.12744	0.17305	1.12744	up	6.5645e-05	0.00366644
9510	ADAMTS1	ADAM metallopeptidase with thrombospondin type 1 motif 1	10.1049	10.1134	10.1075	10.2569	10.2231	10.3368	1.12012	0.16365	1.12012	up	6.6572e-05	0.00369917
5696	PSMB8	proteasome subunit beta 8	9.28588	9.27847	9.24751	9.11075	8.99988	9.12102	-1.14346	-0.193403	1.14346	down	6.68363e-05	0.00370861
83857	TMTC1	transmembrane and tetratricopeptide repeat containing 1	9.04082	9.06225	9.0423	9.19655	9.20354	9.21484	1.1146	0.15652	1.1146	up	6.71747e-05	0.00371691
5604	MAP2K1	mitogen-activated protein kinase kinase 1	9.4277	9.47526	9.43693	9.60778	9.59099	9.59459	1.11046	0.151157	1.11046	up	6.82529e-05	0.00376597
4323	MMP14	matrix metallopeptidase 14 (membrane-inserted)	10.4793	10.4294	10.4673	10.5702	10.6462	10.599	1.10688	0.1465	1.10688	up	6.91806e-05	0.00381181
4739	NEDD9	neural precursor cell expressed, developmentally down-regulated 9	7.44518	7.54677	7.60543	7.85122	7.71965	7.90686	1.22557	0.29345	1.22557	up	7.01553e-05	0.00385019
64397	ZNF106	zinc finger protein 106	9.78398	9.78893	9.85176	9.95631	9.94432	9.98778	1.1131	0.15458	1.1131	up	7.03665e-05	0.00385555
255520	ELMOD2	ELMO/CED-12 domain containing 2	8.95116	8.89895	8.93464	8.77669	8.74317	8.75475	-1.12509	-0.170047	1.12509	down	7.0599e-05	0.00386292
6935	ZEB1	zinc finger E-box binding homeobox 1	10.073	10.0934	10.0915	10.1859	10.2564	10.2801	1.11332	0.154863	1.11332	up	7.21954e-05	0.00393931
3376	IARS	isoleucyl-tRNA synthetase	11.4457	11.4764	11.4861	11.6411	11.6031	11.5614	1.09615	0.13245	1.09615	up	7.24901e-05	0.00394991
163882	CNST	consortin, connexin sorting protein	7.92174	7.95462	8.02745	8.15655	8.17501	8.21083	1.15898	0.21286	1.15898	up	7.26066e-05	0.00395078
2070	EYA4	EYA transcriptional coactivator and phosphatase 4	6.94871	6.97399	7.04848	6.63738	6.7152	6.7692	-1.21683	-0.283133	1.21683	down	7.33048e-05	0.00398327
1465	CSRP1	cysteine and glycine rich protein 1	11.151	11.1429	11.1672	11.2516	11.2767	11.2905	1.08618	0.119263	1.08618	up	7.56558e-05	0.00409969
64778	FNDC3B	fibronectin type III domain containing 3B	10.2257	10.2437	10.2126	10.3844	10.3282	10.4108	1.10737	0.147133	1.10737	up	7.68336e-05	0.00415208
64901	RANBP17	RAN binding protein 17	7.1753	7.24315	7.21186	7.44925	7.44728	7.41902	1.17155	0.228413	1.17155	up	7.71149e-05	0.00415586
116328	C8orf34	chromosome 8 open reading frame 34	5.70567	5.70425	5.83236	6.06232	6.04223	6.13186	1.25821	0.331377	1.25821	up	8.01361e-05	0.004301
84206	MEX3B	mex-3 RNA binding family member B	7.71247	7.84688	7.77906	7.48013	7.43839	7.6043	-1.20737	-0.271863	1.20737	down	8.07044e-05	0.0043256
25907	TMEM158	transmembrane protein 158 (gene/pseudogene)	11.5955	11.6694	11.6964	11.5468	11.4122	11.4715	-1.13049	-0.17695	1.13049	down	8.12416e-05	0.00433827
11120	BTN2A1	butyrophilin, subfamily 2, member A1	8.79819	8.90414	8.91826	9.04733	9.05692	9.10592	1.14594	0.196527	1.14594	up	8.12715e-05	0.00433827
10160	FARP1	FERM, ARH/RhoGEF and pleckstrin domain protein 1	8.52471	8.56563	8.57382	8.68315	8.77685	8.80268	1.14831	0.199507	1.14831	up	8.17632e-05	0.00434095
22883	CLSTN1	calsyntenin 1	7.47574	7.4581	7.48056	7.63397	7.81001	7.7267	1.19093	0.252093	1.19093	up	8.16586e-05	0.00434095
117178	SSX2IP	synovial sarcoma, X breakpoint 2 interacting protein	7.32562	7.31704	7.32005	7.02954	7.134	7.07748	-1.18145	-0.240563	1.18145	down	8.19405e-05	0.00434214
22861	NLRP1	NLR family, pyrin domain containing 1	11.5324	11.5386	11.5588	11.6436	11.6516	11.6677	1.08	0.111027	1.08	up	8.32422e-05	0.00439575
728392	LOC728392	uncharacterized LOC728392	11.5324	11.5386	11.5588	11.6436	11.6516	11.6677	1.08	0.111027	1.08	up	8.32422e-05	0.00439575
126	ADH1C	alcohol dehydrogenase 1C (class I), gamma polypeptide	6.75132	6.63837	6.71416	6.48489	6.35843	6.35679	-1.23221	-0.301247	1.23221	down	8.45426e-05	0.00444058
124	ADH1A	alcohol dehydrogenase 1A (class I), alpha polypeptide	6.75132	6.63837	6.71416	6.48489	6.35843	6.35679	-1.23221	-0.301247	1.23221	down	8.45426e-05	0.00444058
125	ADH1B	alcohol dehydrogenase 1B (class I), beta polypeptide	6.75132	6.63837	6.71416	6.48489	6.35843	6.35679	-1.23221	-0.301247	1.23221	down	8.45426e-05	0.00444058
3399	ID3	inhibitor of DNA binding 3, dominant negative helix-loop-helix protein	9.76644	9.72538	9.73179	9.57491	9.5593	9.62699	-1.11276	-0.154137	1.11276	down	8.50136e-05	0.00445936
839	CASP6	caspase 6	8.2856	8.29073	8.28303	8.13479	8.08545	8.08077	-1.1377	-0.186117	1.1377	down	8.68795e-05	0.00453908
94056	SYAP1	synapse associated protein 1	10.0781	10.0804	10.0951	10.2664	10.1836	10.2426	1.10679	0.146377	1.10679	up	8.76076e-05	0.00454674
57222	ERGIC1	endoplasmic reticulum-golgi intermediate compartment 1	8.60294	8.55736	8.67557	8.7738	8.81249	8.83955	1.14604	0.196657	1.14604	up	8.78351e-05	0.00454674
6383	SDC2	syndecan 2	10.1186	10.1164	10.1407	10.2263	10.2927	10.3535	1.12162	0.16558	1.12162	up	8.74981e-05	0.00454674
59277	NTN4	netrin 4	8.56719	8.50101	8.50655	8.72078	8.68953	8.69661	1.13084	0.17739	1.13084	up	8.89135e-05	0.00459048
10157	AASS	aminoadipate-semialdehyde synthase	7.42032	7.47606	7.42797	7.63693	7.65391	7.67403	1.1595	0.213507	1.1595	up	8.99925e-05	0.00459908
5033	P4HA1	prolyl 4-hydroxylase, alpha polypeptide I	10.3831	10.4248	10.4274	10.7737	10.5453	10.6088	1.1735	0.230817	1.1735	up	9.00889e-05	0.00459908
84858	ZNF503	zinc finger protein 503	9.37096	9.3475	9.40242	9.1865	9.23831	9.22028	-1.1162	-0.158597	1.1162	down	8.92188e-05	0.00459908
120939	TMEM52B	transmembrane protein 52B	6.20218	6.23122	6.30608	6.47401	6.58684	6.57329	1.22963	0.29822	1.22963	up	8.96217e-05	0.00459908
8349	HIST2H2BE	histone cluster 2, H2be	9.05618	9.06128	9.10362	9.26006	9.19711	9.32746	1.13906	0.18785	1.13906	up	9.00364e-05	0.00459908
3074	HEXB	hexosaminidase B (beta polypeptide)	10.3765	10.3354	10.3788	10.5154	10.4808	10.4909	1.09593	0.132153	1.09593	up	9.03014e-05	0.00460174
57507	ZNF608	zinc finger protein 608	8.09474	8.07375	8.13968	7.92095	7.86586	7.91995	-1.14907	-0.20047	1.14907	down	9.09853e-05	0.00462461
2673	GFPT1	glutamine--fructose-6-phosphate transaminase 1	9.46495	9.47811	9.4676	9.59062	9.61451	9.66344	1.1116	0.152637	1.1116	up	9.11272e-05	0.00462585
7262	PHLDA2	pleckstrin homology-like domain, family A, member 2	9.49565	9.55444	9.53326	9.64826	9.74695	9.68936	1.12278	0.167073	1.12278	up	9.2343e-05	0.0046755
8411	EEA1	early endosome antigen 1	7.33387	7.43544	7.40108	7.72783	7.56869	7.6463	1.19539	0.257477	1.19539	up	9.30778e-05	0.00470665
3106	HLA-B	major histocompatibility complex, class I, B	11.3417	11.3615	11.3314	11.166	11.2406	11.2348	-1.09508	-0.131037	1.09508	down	9.35685e-05	0.00470726
10512	SEMA3C	sema domain, immunoglobulin domain (Ig), short basic domain, secreted, (semaphorin) 3C	6.14022	6.24851	6.36848	6.58422	6.60376	6.54815	1.2538	0.326307	1.2538	up	9.35019e-05	0.00470726
3434	IFIT1	interferon induced protein with tetratricopeptide repeats 1	8.69113	8.62848	8.64717	8.45835	8.47326	8.50302	-1.13083	-0.177383	1.13083	down	9.34313e-05	0.00470726
5928	RBBP4	retinoblastoma binding protein 4	7.22979	7.18719	7.20178	6.95055	7.00153	6.96545	-1.17588	-0.233743	1.17588	down	9.40016e-05	0.00472301
9324	HMGN3	high mobility group nucleosomal binding domain 3	9.74907	9.75858	9.72443	9.61193	9.57094	9.61433	-1.1057	-0.14496	1.1057	down	9.42532e-05	0.00472961
27316	RBMX	RNA binding motif protein, X-linked	10.0065	10.102	10.1014	9.86547	9.88081	9.94633	-1.12697	-0.172443	1.12697	down	9.46202e-05	0.00474198
494115	RBMXL1	RNA binding motif protein, X-linked-like 1	10.0065	10.102	10.1014	9.86547	9.88081	9.94633	-1.12697	-0.172443	1.12697	down	9.46202e-05	0.00474198
84919	PPP1R15B	protein phosphatase 1 regulatory subunit 15B	7.60581	7.57774	7.54552	7.72682	7.88643	7.84822	1.18438	0.244133	1.18438	up	9.60931e-05	0.00480967
22800	RRAS2	related RAS viral (r-ras) oncogene homolog 2	9.95968	9.96974	10.0254	10.1208	10.1134	10.1556	1.10572	0.14498	1.10572	up	9.86526e-05	0.00491412
22903	BTBD3	BTB (POZ) domain containing 3	9.77043	9.82434	9.82769	10.0564	9.91545	9.99519	1.13408	0.18152	1.13408	up	9.86797e-05	0.00491412
5805	PTS	6-pyruvoyltetrahydropterin synthase	9.95855	9.94099	9.90869	10.1228	10.0477	10.0825	1.10821	0.148227	1.10821	up	9.95223e-05	0.00493734
1639	DCTN1	dynactin subunit 1	9.57779	9.6304	9.62513	9.71259	9.83497	9.8317	1.13444	0.18198	1.13444	up	9.94261e-05	0.00493734
64859	NABP1	nucleic acid binding protein 1	9.96514	10.0626	10.1088	10.2607	10.192	10.2296	1.13436	0.181883	1.13436	up	0.00010031	0.0049639
7552	ZNF711	zinc finger protein 711	5.61977	5.36506	5.56787	4.99338	5.07805	5.20112	-1.34417	-0.426717	1.34417	down	0.000100832	0.00498347
28984	RGCC	regulator of cell cycle	10.213	10.229	10.294	10.0792	10.0731	10.1288	-1.11084	-0.151647	1.11084	down	0.000101464	0.00500459
399694	SHC4	SHC (Src homology 2 domain containing) family member 4	6.82558	6.89408	7.00526	6.6255	6.63859	6.60803	-1.21779	-0.284267	1.21779	down	0.000101514	0.00500459
715	C1R	complement component 1, r subcomponent	9.70728	9.69798	9.71023	9.54428	9.55745	9.58922	-1.10306	-0.141513	1.10306	down	0.000102248	0.00502208
8492	PRSS12	protease, serine 12	8.14756	8.21475	8.13401	8.33604	8.34491	8.41481	1.14855	0.199813	1.14855	up	0.000102252	0.00502208
3214	HOXB4	homeobox B4	8.87802	8.77575	8.80471	8.5693	8.61146	8.67699	-1.14889	-0.200243	1.14889	down	0.000103613	0.00505735
23670	TMEM2	transmembrane protein 2	7.62026	7.60815	7.64582	7.79452	7.82981	7.86588	1.15295	0.205327	1.15295	up	0.00010342	0.00505735
222183	SRRM3	serine/arginine repetitive matrix 3	5.07522	5.08451	5.2375	4.67518	4.774	4.78321	-1.30883	-0.38828	1.30883	down	0.000103806	0.00506049
1778	DYNC1H1	dynein, cytoplasmic 1, heavy chain 1	10.6611	10.6764	10.7003	10.4811	10.5481	10.5747	-1.10547	-0.14466	1.10547	down	0.000104483	0.00508722
151242	PPP1R1C	protein phosphatase 1 regulatory inhibitor subunit 1C	4.44504	4.34643	4.3	4.74006	4.79332	4.72903	1.31068	0.390313	1.31068	up	0.000105741	0.00512939
9200	HACD1	3-hydroxyacyl-CoA dehydratase 1	9.67853	9.71396	9.74583	9.86307	9.85593	9.8499	1.1046	0.143527	1.1046	up	0.000105721	0.00512939
84897	TBRG1	transforming growth factor beta regulator 1	8.10532	8.11153	8.06502	7.86453	7.89961	7.9324	-1.14481	-0.19511	1.14481	down	0.000107463	0.00520012
54893	MTMR10	myotubularin related protein 10	8.25208	8.20759	8.28521	8.437	8.40255	8.48164	1.14243	0.192103	1.14243	up	0.000108001	0.00521332
2058	EPRS	glutamyl-prolyl-tRNA synthetase	9.33151	9.39187	9.39687	9.52642	9.51336	9.53741	1.11135	0.152313	1.11135	up	0.000108336	0.00522311
10296	MAEA	macrophage erythroblast attacher	9.03789	9.01782	9.05259	8.85802	8.85269	8.91082	-1.11904	-0.162257	1.11904	down	0.000110515	0.00530865
23060	ZNF609	zinc finger protein 609	4.91305	4.88349	4.58589	5.14159	5.31308	5.44203	1.41888	0.504757	1.41888	up	0.000112725	0.00538194
5865	RAB3B	RAB3B, member RAS oncogene family	10.0627	10.0513	10.045	10.1615	10.1994	10.1873	1.0941	0.12974	1.0941	up	0.000113565	0.00541393
8995	TNFSF18	tumor necrosis factor superfamily member 18	4.50713	4.53736	4.50713	4.94393	4.86313	4.84655	1.28996	0.36733	1.28996	up	0.000113758	0.00541393
5465	PPARA	peroxisome proliferator-activated receptor alpha	6.89305	7.03996	7.01449	7.21498	7.24667	7.25542	1.1946	0.256523	1.1946	up	0.000114703	0.00541972
3654	IRAK1	interleukin 1 receptor associated kinase 1	8.72227	8.70387	8.69119	8.52078	8.55065	8.55207	-1.12086	-0.16461	1.12086	down	0.000114694	0.00541972
6386	SDCBP	syndecan binding protein	11.145	11.1457	11.1615	11.032	11.0193	11.0565	-1.08281	-0.114787	1.08281	down	0.000114746	0.00541972
54360	CYTL1	cytokine like 1	6.06518	5.90989	6.11121	6.33017	6.4237	6.32597	1.25805	0.331187	1.25805	up	0.000114756	0.00541972
11227	GALNT5	polypeptide N-acetylgalactosaminyltransferase 5	10.4208	10.4487	10.4605	10.5805	10.5431	10.5984	1.09482	0.130697	1.09482	up	0.000115042	0.00542021
641700	ECSCR	endothelial cell surface expressed chemotaxis and apoptosis regulator	4.46527	4.52716	4.68598	4.93818	4.9308	5.02568	1.32447	0.405417	1.32447	up	0.000114977	0.00542021
5157	PDGFRL	platelet-derived growth factor receptor-like	8.58251	8.62888	8.65153	8.76404	8.80989	8.80499	1.12662	0.172	1.12662	up	0.000115629	0.00542834
4088	SMAD3	SMAD family member 3	10.9804	10.9689	10.9781	10.8394	10.8881	10.8323	-1.08865	-0.122543	1.08865	down	0.000115456	0.00542834
10477	UBE2E3	ubiquitin conjugating enzyme E2E 3	11.461	11.4473	11.495	11.3662	11.2953	11.3572	-1.09292	-0.128183	1.09292	down	0.000116379	0.00545705
94005	PIGS	phosphatidylinositol glycan anchor biosynthesis class S	8.92846	8.98818	8.97415	9.10597	9.13607	9.12309	1.11583	0.158113	1.11583	up	0.0001168	0.00547029
223117	SEMA3D	sema domain, immunoglobulin domain (Ig), short basic domain, secreted, (semaphorin) 3D	6.33334	6.36204	6.49187	6.71983	6.68253	6.65372	1.22231	0.28961	1.22231	up	0.000117948	0.00551747
6910	TBX5	T-box 5	9.72551	9.77527	9.71163	9.59494	9.54689	9.61101	-1.11203	-0.15319	1.11203	down	0.000118119	0.00551888
8826	IQGAP1	IQ motif containing GTPase activating protein 1	9.86375	9.83494	9.8717	9.9877	9.98286	9.99706	1.09612	0.13241	1.09612	up	0.000118394	0.00552518
57493	HEG1	heart development protein with EGF-like domains 1	9.03399	9.14341	9.12262	9.25115	9.26836	9.33897	1.13773	0.186153	1.13773	up	0.000119762	0.00558242
3045	HBD	hemoglobin subunit delta	4.9974	5.16206	5.132	5.63974	5.94644	5.38882	1.47548	0.56118	1.47548	up	0.000120523	0.00559839
100187828	HBD	hypophosphatemic bone disease	4.9974	5.16206	5.132	5.63974	5.94644	5.38882	1.47548	0.56118	1.47548	up	0.000120523	0.00559839
9678	PHF14	PHD finger protein 14	4.71679	4.71679	4.84937	4.32145	4.14386	4.45202	-1.37098	-0.455207	1.37098	down	0.000120822	0.00560526
3675	ITGA3	integrin alpha 3	8.24993	8.25011	8.28871	8.41311	8.45972	8.44318	1.12955	0.175753	1.12955	up	0.000121028	0.0056082
7050	TGIF1	TGFB-induced factor homeobox 1	7.98729	8.01853	8.02359	7.7809	7.84627	7.82178	-1.14352	-0.193487	1.14352	down	0.000122838	0.00568538
7404	UTY	ubiquitously transcribed tetratricopeptide repeat containing, Y-linked	6.99363	6.99881	6.93689	6.73887	6.69668	6.76002	-1.18475	-0.244587	1.18475	down	0.000123817	0.00572396
7389	UROD	uroporphyrinogen decarboxylase	10.1232	10.0981	10.1057	9.89765	10.0009	9.97128	-1.1114	-0.152383	1.1114	down	0.000124383	0.00573484
4131	MAP1B	microtubule associated protein 1B	8.86102	8.89187	8.89152	9.00637	9.04619	9.1113	1.12752	0.17315	1.12752	up	0.000125359	0.0057614
63898	SH2D4A	SH2 domain containing 4A	7.69867	7.69004	7.72929	7.88637	7.87984	7.97128	1.15388	0.206497	1.15388	up	0.000125953	0.00578193
664709	HNRNPA1P10	heterogeneous nuclear ribonucleoprotein A1 pseudogene 10	12.4286	12.4659	12.4839	12.3401	12.3059	12.3779	-1.08536	-0.118177	1.08536	down	0.000127928	0.00585894
328	APEX1	APEX nuclease (multifunctional DNA repair enzyme) 1	10.8121	10.8099	10.8464	10.6615	10.7181	10.7081	-1.09196	-0.126917	1.09196	down	0.000128337	0.00587084
23022	PALLD	palladin, cytoskeletal associated protein	11.4326	11.4752	11.4499	11.5694	11.5438	11.5836	1.0815	0.113037	1.0815	up	0.000129774	0.00590908
60559	SPCS3	signal peptidase complex subunit 3	8.85002	8.83008	8.90844	9.07338	8.98193	9.09352	1.13821	0.186763	1.13821	up	0.000131642	0.00597341
6641	SNTB1	syntrophin, beta 1 (dystrophin-associated protein A1, 59kDa, basic component 1)	7.43785	7.38308	7.46848	7.6131	7.69551	7.63926	1.16432	0.219487	1.16432	up	0.000131954	0.00598063
25842	ASF1A	anti-silencing function 1A histone chaperone	8.52823	8.62199	8.58412	8.32174	8.26485	8.45002	-1.17493	-0.232577	1.17493	down	0.000132738	0.00600928
64398	MPP5	membrane protein, palmitoylated 5	8.90093	8.99944	8.98383	9.10517	9.13346	9.21112	1.13959	0.188517	1.13959	up	0.000133427	0.00603349
5069	PAPPA	pregnancy-associated plasma protein A, pappalysin 1	6.73607	6.72887	6.87208	7.11157	6.97855	7.24595	1.25964	0.333017	1.25964	up	0.000134741	0.00607897
144406	WDR66	WD repeat domain 66	7.38994	7.42329	7.43011	7.5702	7.65075	7.68831	1.16633	0.221973	1.16633	up	0.000135604	0.00610387
6006	RHCE	Rh blood group, CcEe antigens	3.91752	4.29677	4.58589	4.88103	4.86313	4.98029	1.55987	0.641423	1.55987	up	0.000136272	0.00611994
6007	RHD	Rh blood group, D antigen	3.91752	4.29677	4.58589	4.88103	4.86313	4.98029	1.55987	0.641423	1.55987	up	0.000136272	0.00611994
5954	RCN1	reticulocalbin 1	10.1995	10.2542	10.2243	10.342	10.3479	10.3822	1.09533	0.131367	1.09533	up	0.000139773	0.00625791
23446	SLC44A1	solute carrier family 44 (choline transporter), member 1	9.11623	9.17262	9.15157	8.96746	8.97644	9.02194	-1.11589	-0.158193	1.11589	down	0.000139813	0.00625791
1306	COL15A1	collagen, type XV, alpha 1	7.28998	7.35642	7.42568	7.53418	7.6271	7.64034	1.1836	0.24318	1.1836	up	0.000139821	0.00625791
440034	DKFZp686K1684	uncharacterized LOC440034	10.1995	10.2542	10.2243	10.342	10.3479	10.3822	1.09533	0.131367	1.09533	up	0.000139773	0.00625791
6662	SOX9	SRY-box 9	7.9493	7.97623	8.0762	7.81885	7.77032	7.77032	-1.15996	-0.21408	1.15996	down	0.000140946	0.00628363
102288414	C11orf98	chromosome 11 open reading frame 98	8.89659	8.86653	8.84608	8.68285	8.69784	8.73818	-1.11996	-0.163443	1.11996	down	0.000140691	0.00628363
9761	MLEC	malectin	8.00354	7.99012	8.03469	8.13935	8.24235	8.25749	1.15158	0.203613	1.15158	up	0.000140961	0.00628363
79081	LBHD1	LBH domain containing 1	8.89659	8.86653	8.84608	8.68285	8.69784	8.73818	-1.11996	-0.163443	1.11996	down	0.000140691	0.00628363
100124534	SNORA84	small nucleolar RNA, H/ACA box 84	4.92995	4.95954	4.57564	5.38683	5.47991	5.17616	1.43985	0.525923	1.43985	up	0.000141462	0.00628935
100996517	LOC100996517	vesicle-trafficking protein SEC22b-like	9.12401	9.10142	9.14964	9.27524	9.2545	9.29271	1.1089	0.149127	1.1089	up	0.000143156	0.00634586
102724364	LOC102724364	vesicle-trafficking protein SEC22b-like	9.12401	9.10142	9.14964	9.27524	9.2545	9.29271	1.1089	0.149127	1.1089	up	0.000143156	0.00634586
100996716	LOC100996716	vesicle-trafficking protein SEC22b-like	9.12401	9.10142	9.14964	9.27524	9.2545	9.29271	1.1089	0.149127	1.1089	up	0.000143156	0.00634586
9554	SEC22B	SEC22 homolog B, vesicle trafficking protein (gene/pseudogene)	9.12401	9.10142	9.14964	9.27524	9.2545	9.29271	1.1089	0.149127	1.1089	up	0.000143156	0.00634586
6319	SCD	stearoyl-CoA desaturase (delta-9-desaturase)	7.65791	7.64933	7.70131	7.43746	7.44133	7.50518	-1.15524	-0.208193	1.15524	down	0.00014531	0.00641597
148423	C1orf52	chromosome 1 open reading frame 52	9.74073	9.78934	9.79705	9.96119	9.87235	9.97333	1.11722	0.159917	1.11722	up	0.000148136	0.00650101
148898	ZNF436-AS1	ZNF436 antisense RNA 1	7.43011	7.57586	7.60208	7.72731	7.85493	7.80022	1.19593	0.258137	1.19593	up	0.000148227	0.00650101
5048	PAFAH1B1	platelet activating factor acetylhydrolase 1b regulatory subunit 1	8.82531	8.86204	8.86551	8.96644	9.0711	9.03129	1.12661	0.17199	1.12661	up	0.000148607	0.00651039
51200	CPA4	carboxypeptidase A4	10.5522	10.5439	10.5542	10.6335	10.7348	10.6983	1.10097	0.13877	1.10097	up	0.000149755	0.00654612
9540	TP53I3	tumor protein p53 inducible protein 3	9.81555	9.80685	9.8322	9.63545	9.70291	9.69146	-1.10312	-0.141593	1.10312	down	0.000150093	0.00655363
57522	SRGAP1	SLIT-ROBO Rho GTPase activating protein 1	6.76701	6.85877	6.83895	7.09056	7.12197	7.00872	1.191	0.252173	1.191	up	0.00015195	0.00660538
29982	NRBF2	nuclear receptor binding factor 2	8.88925	8.85274	8.88608	8.98974	9.05698	9.08008	1.12213	0.166243	1.12213	up	0.000152566	0.00661754
3673	ITGA2	integrin, alpha 2 (CD49B, alpha 2 subunit of VLA-2 receptor)	9.36211	9.33325	9.35983	9.23547	9.03414	9.15313	-1.15734	-0.210817	1.15734	down	0.000152496	0.00661754
6299	SALL1	spalt-like transcription factor 1	7.06122	7.00152	7.13913	6.70448	6.80946	6.85931	-1.21101	-0.276207	1.21101	down	0.000154673	0.00668679
3688	ITGB1	integrin beta 1	11.6754	11.6369	11.6733	11.7744	11.7536	11.7758	1.07629	0.106063	1.07629	up	0.00015562	0.00670564
8406	SRPX	sushi-repeat containing protein, X-linked	9.609	9.59048	9.62989	9.73315	9.73362	9.80632	1.10796	0.147907	1.10796	up	0.000155481	0.00670564
8794	TNFRSF10C	tumor necrosis factor receptor superfamily member 10c, decoy without an intracellular domain	4.86662	4.97714	5.08166	5.28131	5.35444	5.40791	1.29482	0.372747	1.29482	up	0.000158599	0.0068265
5534	PPP3R1	protein phosphatase 3 regulatory subunit B, alpha	7.55364	7.50156	7.52654	7.28269	7.31561	7.35234	-1.15698	-0.210367	1.15698	down	0.000158847	0.00682971
731220	RFX8	RFX family member 8, lacking RFX DNA binding domain	5.89467	5.95568	5.81847	5.56231	5.56935	5.60988	-1.23893	-0.309093	1.23893	down	0.000159938	0.00685589
1906	EDN1	endothelin 1	5.4861	5.84445	5.63906	6.03168	6.03859	6.09216	1.31732	0.397607	1.31732	up	0.000159741	0.00685589
1075	CTSC	cathepsin C	9.21426	9.31219	9.33679	9.51438	9.41167	9.50531	1.14027	0.189373	1.14027	up	0.000160718	0.00687315
122525	C14orf28	chromosome 14 open reading frame 28	6.91728	6.89817	7.01101	7.16017	7.21229	7.17118	1.18022	0.23906	1.18022	up	0.000160905	0.00687315
1278	COL1A2	collagen, type I, alpha 2	13.2863	13.2943	13.2937	13.3735	13.3654	13.3977	1.06246	0.0874133	1.06246	up	0.000162145	0.00690362
9976	CLEC2B	C-type lectin domain family 2, member B	8.31322	8.2484	8.37166	8.11321	8.05826	8.14801	-1.15237	-0.2046	1.15237	down	0.00016326	0.0069361
2617	GARS	glycyl-tRNA synthetase	11.5509	11.5453	11.5541	11.6465	11.639	11.6849	1.07677	0.106713	1.07677	up	0.000163603	0.00694318
57020	C16orf62	chromosome 16 open reading frame 62	7.4929	7.50192	7.57466	7.29025	7.28835	7.34306	-1.16146	-0.21594	1.16146	down	0.000163891	0.00694789
3178	HNRNPA1	heterogeneous nuclear ribonucleoprotein A1	11.6621	11.6783	11.7105	11.5818	11.5389	11.5884	-1.08216	-0.11391	1.08216	down	0.000164717	0.00696353
5829	PXN	paxillin	11.2387	11.2636	11.2926	11.0903	11.133	11.1785	-1.09508	-0.13104	1.09508	down	0.000164645	0.00696353
1200	TPP1	tripeptidyl peptidase I	7.59064	7.54083	7.59671	7.28376	7.37148	7.40322	-1.16735	-0.22324	1.16735	down	0.000166087	0.00700323
22807	IKZF2	IKAROS family zinc finger 2	7.08317	7.09984	7.15257	7.31867	7.43396	7.30434	1.18137	0.240463	1.18137	up	0.000166905	0.0070302
2275	FHL3	four and a half LIM domains 3	7.42172	7.36332	7.52585	7.20834	7.17063	7.20844	-1.18194	-0.24116	1.18194	down	0.000168709	0.00709443
2560	GABRB1	gamma-aminobutyric acid (GABA) A receptor, beta 1	6.39426	6.4446	6.49473	6.1202	6.23775	6.11626	-1.21964	-0.28646	1.21964	down	0.000169116	0.00710052
3977	LIFR	leukemia inhibitory factor receptor alpha	5.24248	5.27645	5.22545	5.59121	5.49046	5.66076	1.25935	0.332683	1.25935	up	0.000170152	0.0071288
8745	ADAM23	ADAM metallopeptidase domain 23	7.34772	7.44398	7.49933	7.66969	7.61486	7.76349	1.19113	0.252337	1.19113	up	0.000171781	0.00718176
8905	AP1S2	adaptor-related protein complex 1 sigma 2 subunit	10.9791	10.9986	11.0454	11.1133	11.1242	11.1475	1.08721	0.12063	1.08721	up	0.000172217	0.00719234
57551	TAOK1	TAO kinase 1	6.46391	6.35716	6.49768	6.76083	6.74954	6.64929	1.21445	0.280303	1.21445	up	0.000172908	0.00721353
60686	C14orf93	chromosome 14 open reading frame 93	6.40439	6.3563	6.3764	6.10462	6.06322	6.15905	-1.20586	-0.270067	1.20586	down	0.000174333	0.00725761
9194	SLC16A7	solute carrier family 16 (monocarboxylate transporter), member 7	4.69551	4.71261	4.72659	5.08985	5.04262	5.014	1.26335	0.337253	1.26335	up	0.000174993	0.00727739
1848	DUSP6	dual specificity phosphatase 6	9.95426	9.95054	9.92839	10.0501	10.0938	10.0725	1.09258	0.12774	1.09258	up	0.000176825	0.00733355
10211	FLOT1	flotillin 1	9.09904	9.14679	9.17308	8.98697	8.98425	8.99046	-1.11142	-0.15241	1.11142	down	0.000178724	0.00739348
22949	PTGR1	prostaglandin reductase 1	11.4757	11.4905	11.5286	11.3787	11.3688	11.4081	-1.0815	-0.11304	1.0815	down	0.000179254	0.00740759
100532724	NPHP3-ACAD11	NPHP3-ACAD11 readthrough (NMD candidate)	7.37673	7.43659	7.45246	7.58581	7.67144	7.64502	1.15842	0.212163	1.15842	up	0.000180465	0.00743399
84129	ACAD11	acyl-CoA dehydrogenase family member 11	7.37673	7.43659	7.45246	7.58581	7.67144	7.64502	1.15842	0.212163	1.15842	up	0.000180465	0.00743399
3572	IL6ST	interleukin 6 signal transducer	9.67113	9.67215	9.70166	9.80853	9.79407	9.85364	1.09969	0.1371	1.09969	up	0.000180837	0.00743399
81786	TRIM7	tripartite motif containing 7	4.90164	4.74034	4.91285	4.5108	4.5031	4.33038	-1.32273	-0.403517	1.32273	down	0.000181094	0.00743676
3799	KIF5B	kinesin family member 5B	8.93377	8.96269	8.96624	9.11016	9.09264	9.09485	1.10572	0.144983	1.10572	up	0.000184204	0.00753302
64342	HS1BP3	HCLS1 binding protein 3	7.77974	7.86832	7.81143	7.59676	7.62528	7.64197	-1.1475	-0.198493	1.1475	down	0.000187371	0.00763873
93349	SP140L	SP140 nuclear body protein like	3.99711	4.06635	3.98767	4.29176	4.47138	4.56455	1.34306	0.42552	1.34306	up	0.00018798	0.0076477
8476	CDC42BPA	CDC42 binding protein kinase alpha (DMPK-like)	9.3932	9.33513	9.34866	9.48964	9.49825	9.51084	1.10235	0.14058	1.10235	up	0.000190176	0.00772905
10272	FSTL3	follistatin-like 3 (secreted glycoprotein)	5.70842	5.57712	5.7785	6.06419	5.92525	6.17243	1.28872	0.365943	1.28872	up	0.000194346	0.00786324
4071	TM4SF1	transmembrane 4 L six family member 1	11.884	11.8995	11.9381	12.0062	11.9991	12.0637	1.08358	0.11581	1.08358	up	0.000194477	0.00786324
5441	POLR2L	polymerase (RNA) II (DNA directed) polypeptide L, 7.6kDa	12.2889	12.2788	12.2955	12.3818	12.3852	12.3713	1.06565	0.09173	1.06565	up	0.00019574	0.00790619
8036	SHOC2	SHOC2 leucine-rich repeat scaffold protein	10.3173	10.3011	10.335	10.4757	10.4205	10.4312	1.09026	0.124667	1.09026	up	0.000197772	0.00797186
8878	SQSTM1	sequestosome 1	10.0965	10.1866	10.3173	9.95683	9.9963	10.0175	-1.15661	-0.2099	1.15661	down	0.000197596	0.00797186
3428	IFI16	interferon, gamma-inducible protein 16	9.70219	9.74925	9.77494	9.57056	9.50004	9.63772	-1.12716	-0.172687	1.12716	down	0.000198107	0.0079772
11056	DDX52	DEAD (Asp-Glu-Ala-Asp) box polypeptide 52	5.89381	6.05076	6.02879	6.41534	6.2503	6.26557	1.24771	0.319283	1.24771	up	0.000199832	0.00801436
9749	PHACTR2	phosphatase and actin regulator 2	8.18498	8.30283	8.19915	8.38632	8.49045	8.42004	1.15132	0.203283	1.15132	up	0.000199845	0.00801436
90410	IFT20	intraflagellar transport 20	9.51552	9.54801	9.53033	9.64065	9.66402	9.71497	1.10338	0.141927	1.10338	up	0.000199538	0.00801436
53833	IL20RB	interleukin 20 receptor beta subunit	5.16434	5.06421	5.13603	5.39845	5.5659	5.42571	1.26736	0.341827	1.26736	up	0.00020141	0.00806893
84171	LOXL4	lysyl oxidase like 4	8.90311	8.89339	8.84942	8.98845	9.12795	9.07492	1.1343	0.1818	1.1343	up	0.000202386	0.00809976
5125	PCSK5	proprotein convertase subtilisin/kexin type 5	7.32245	7.39546	7.34166	7.53671	7.59464	7.54671	1.15362	0.206163	1.15362	up	0.000204141	0.0081617
5768	QSOX1	quiescin sulfhydryl oxidase 1	9.24438	9.24579	9.32534	9.38212	9.46199	9.47116	1.1224	0.166587	1.1224	up	0.000204632	0.00816992
200058	FLJ23867	uncharacterized protein FLJ23867	9.24438	9.24579	9.32534	9.38212	9.46199	9.47116	1.1224	0.166587	1.1224	up	0.000204632	0.00816992
51367	POP5	POP5 homolog, ribonuclease P/MRP subunit	9.45524	9.46973	9.49225	9.34873	9.27824	9.34787	-1.10762	-0.14746	1.10762	down	0.000205059	0.00816992
481	ATP1B1	ATPase, Na+/K+ transporting, beta 1 polypeptide	8.12045	8.18159	8.17393	8.29735	8.3438	8.37039	1.13172	0.178523	1.13172	up	0.000205967	0.00818327
5797	PTPRM	protein tyrosine phosphatase, receptor type, M	10.1913	10.1759	10.1669	10.2959	10.2895	10.3001	1.08459	0.117143	1.08459	up	0.000209975	0.00831047
219902	TMEM136	transmembrane protein 136	6.62457	6.64538	6.60244	6.81231	6.86403	6.9809	1.19882	0.261617	1.19882	up	0.000210621	0.0083277
9118	INA	internexin neuronal intermediate filament protein alpha	5.79645	5.89301	5.94924	5.58687	5.53856	5.59494	-1.23637	-0.30611	1.23637	down	0.000211169	0.00834098
54732	TMED9	transmembrane p24 trafficking protein 9	11.6037	11.6197	11.6342	11.7064	11.7271	11.7245	1.07186	0.10012	1.07186	up	0.000214328	0.00842399
4259	MGST3	microsomal glutathione S-transferase 3	11.7091	11.7487	11.7511	11.6412	11.5889	11.6429	-1.08068	-0.111943	1.08068	down	0.000214025	0.00842399
221035	REEP3	receptor accessory protein 3	8.66282	8.7184	8.71568	8.89133	8.84718	8.83559	1.11656	0.159067	1.11656	up	0.000216788	0.00849467
6249	CLIP1	CAP-Gly domain containing linker protein 1	9.07573	9.07503	9.13046	9.21168	9.24531	9.28915	1.1134	0.154973	1.1134	up	0.000217433	0.00851147
64175	P3H1	prolyl 3-hydroxylase 1	9.45284	9.50063	9.48184	9.61009	9.59983	9.62768	1.09741	0.134097	1.09741	up	0.000218887	0.00855987
29083	GTPBP8	GTP-binding protein 8 (putative)	8.55678	8.62396	8.61608	8.79402	8.7371	8.75568	1.11987	0.163327	1.11987	up	0.000223473	0.00871324
9246	UBE2L6	ubiquitin conjugating enzyme E2L 6	9.35416	9.43535	9.44268	9.22528	9.21358	9.29797	-1.12126	-0.16512	1.12126	down	0.00022461	0.00874888
599	BCL2L2	BCL2-like 2	10.1512	10.1927	10.1295	10.2508	10.3103	10.3204	1.09892	0.13608	1.09892	up	0.000225815	0.00877846
351	APP	amyloid beta (A4) precursor protein	9.63383	9.67467	9.66815	9.95987	9.75895	9.84596	1.14555	0.196043	1.14555	up	0.000226733	0.00880543
6397	SEC14L1	SEC14-like lipid binding 1	7.7752	7.74845	7.78983	7.93316	7.97742	7.94342	1.13302	0.180173	1.13302	up	0.000227145	0.00881275
4060	LUM	lumican	10.1722	10.1795	10.2675	10.4745	10.2936	10.4553	1.14981	0.20139	1.14981	up	0.000230154	0.00890314
3837	KPNB1	karyopherin (importin) beta 1	9.90602	9.99434	9.93292	10.0977	10.0855	10.064	1.10037	0.137987	1.10037	up	0.00023076	0.00890905
1534	CYB561	cytochrome b561	8.07845	8.17209	8.13801	7.84086	7.9536	7.96749	-1.15578	-0.208867	1.15578	down	0.000230692	0.00890905
5328	PLAU	plasminogen activator, urokinase	12.0042	12.042	12.0534	12.1447	12.1219	12.1329	1.07176	0.0999767	1.07176	up	0.000233135	0.00898312
6597	SMARCA4	SWI/SNF related, matrix associated, actin dependent regulator of chromatin, subfamily a, member 4	9.25768	9.25121	9.25758	9.12832	9.13334	9.08323	-1.10231	-0.140527	1.10231	down	0.000234126	0.00900368
51155	HN1	hematological and neurological expressed 1	11.0616	11.076	11.0997	10.9147	10.9695	10.9898	-1.08755	-0.121077	1.08755	down	0.000234413	0.00900588
64374	SIL1	SIL1 nucleotide exchange factor	8.73281	8.78417	8.77044	8.85696	9.01469	9.01056	1.14732	0.198263	1.14732	up	0.00023635	0.00906262
10899	JTB	jumping translocation breakpoint	10.9046	10.9382	10.9504	11.0266	11.0562	11.0433	1.07999	0.111017	1.07999	up	0.00023682	0.00907178
10447	FAM3C	family with sequence similarity 3 member C	8.88213	8.92014	8.98408	9.18855	9.03009	9.22348	1.1636	0.21859	1.1636	up	0.000237554	0.00908225
6574	SLC20A1	solute carrier family 20 (phosphate transporter), member 1	11.5812	11.6001	11.5767	11.4995	11.4713	11.4861	-1.07203	-0.100347	1.07203	down	0.000237405	0.00908225
27351	DESI1	desumoylating isopeptidase 1	7.91779	7.93006	7.99695	8.14669	8.08815	8.23263	1.15473	0.207557	1.15473	up	0.000237892	0.00908632
6520	SLC3A2	solute carrier family 3 (amino acid transporter heavy chain), member 2	9.53085	9.54893	9.50908	9.6189	9.70268	9.73494	1.11411	0.155887	1.11411	up	0.000238526	0.00910169
26090	ABHD12	abhydrolase domain containing 12	9.20835	9.20409	9.19113	9.3225	9.3264	9.36882	1.10042	0.13805	1.10042	up	0.000239906	0.00913663
2091	FBL	fibrillarin	10.4719	10.5232	10.5026	10.3426	10.3947	10.3881	-1.08982	-0.12409	1.08982	down	0.000241801	0.00916937
91775	NXPE3	neurexophilin and PC-esterase domain family member 3	6.91439	7.0499	7.02625	7.24584	7.22788	7.21272	1.17443	0.231967	1.17443	up	0.000241858	0.00916937
23327	NEDD4L	neural precursor cell expressed, developmentally down-regulated 4-like, E3 ubiquitin protein ligase	7.39625	7.38541	7.28348	7.52585	7.63341	7.57844	1.16812	0.224187	1.16812	up	0.000242013	0.00916937
57178	ZMIZ1	zinc finger, MIZ-type containing 1	9.77554	9.79901	9.84875	9.62935	9.6352	9.70987	-1.10928	-0.149627	1.10928	down	0.000241814	0.00916937
79573	TTC13	tetratricopeptide repeat domain 13	7.9337	7.89452	7.92603	8.07481	8.09213	8.10195	1.12627	0.171547	1.12627	up	0.000243778	0.00922162
28971	AAMDC	adipogenesis associated, Mth938 domain containing	8.55467	8.59099	8.63138	8.71587	8.76694	8.84587	1.13593	0.18388	1.13593	up	0.000245508	0.00926033
7298	TYMS	thymidylate synthetase	9.23984	9.21747	9.22628	9.07203	9.06701	9.11927	-1.10325	-0.14176	1.10325	down	0.000246568	0.00929141
253827	MSRB3	methionine sulfoxide reductase B3	9.14402	9.14431	9.17707	9.24585	9.35185	9.3921	1.12881	0.1748	1.12881	up	0.000247816	0.00932057
5333	PLCD1	phospholipase C delta 1	8.11172	8.10656	8.13486	7.85175	7.96275	7.96163	-1.14261	-0.192337	1.14261	down	0.000248676	0.00934401
51603	METTL13	methyltransferase like 13	7.75461	7.79146	7.832	7.56296	7.59663	7.63461	-1.14443	-0.194623	1.14443	down	0.000251214	0.0094124
3082	HGF	hepatocyte growth factor (hepapoietin A; scatter factor)	8.79248	8.84174	8.87281	9.03749	9.00524	8.955	1.12005	0.163567	1.12005	up	0.000251657	0.00942003
221914	GPC2	glypican 2	5.56173	5.4285	5.38393	5.13874	5.0595	5.16603	-1.2628	-0.33663	1.2628	down	0.00025201	0.00942426
10060	ABCC9	ATP binding cassette subfamily C member 9	5.2866	5.10173	5.18278	5.73289	5.78027	5.39364	1.36153	0.44523	1.36153	up	0.000253113	0.00945653
23236	PLCB1	phospholipase C beta 1	8.8998	8.93946	8.95189	9.05698	9.09279	9.07797	1.10614	0.14553	1.10614	up	0.000254037	0.00948204
211	ALAS1	5'-aminolevulinate synthase 1	8.88095	8.98145	8.91408	8.73816	8.60648	8.79269	-1.15914	-0.21305	1.15914	down	0.00025505	0.00949431
10626	TRIM16	tripartite motif containing 16	8.96715	8.96758	8.96951	8.81939	8.83907	8.82355	-1.10247	-0.140743	1.10247	down	0.000257061	0.00954962
147166	TRIM16L	tripartite motif containing 16-like	8.96715	8.96758	8.96951	8.81939	8.83907	8.82355	-1.10247	-0.140743	1.10247	down	0.000257061	0.00954962
7169	TPM2	tropomyosin 2 (beta)	9.02634	8.96981	8.98904	9.11305	9.15919	9.15276	1.10696	0.146603	1.10696	up	0.000258762	0.00955722
8087	FXR1	fragile X mental retardation, autosomal homolog 1	10.3188	10.3599	10.3161	10.2147	10.1796	10.2295	-1.08951	-0.123673	1.08951	down	0.000258799	0.00955722
25977	NECAP1	NECAP endocytosis associated 1	8.86883	8.91251	8.87365	9.0546	9.0209	9.01685	1.10633	0.145787	1.10633	up	0.00025964	0.00955722
860	RUNX2	runt-related transcription factor 2	7.76681	7.79408	7.97353	7.58089	7.63055	7.58965	-1.18464	-0.244443	1.18464	down	0.000257999	0.00955722
834	CASP1	caspase 1	6.09669	6.00567	6.06505	5.66011	5.8086	5.8018	-1.23026	-0.298967	1.23026	down	0.000259695	0.00955722
5627	PROS1	protein S (alpha)	8.4971	8.49302	8.54094	8.38366	8.32221	8.33042	-1.12111	-0.164923	1.12111	down	0.00025891	0.00955722
25989	ULK3	unc-51 like kinase 3	7.55415	7.32362	7.41078	7.22222	7.12907	7.12514	-1.2064	-0.270707	1.2064	down	0.000259288	0.00955722
5396	PRRX1	paired related homeobox 1	9.90883	9.94083	9.87594	9.78879	9.72145	9.79218	-1.10272	-0.14106	1.10272	down	0.000262062	0.00963532
10413	YAP1	Yes associated protein 1	7.88733	7.93679	7.89985	7.74006	7.62112	7.74702	-1.15289	-0.205257	1.15289	down	0.0002633	0.00966717
221	ALDH3B1	aldehyde dehydrogenase 3 family member B1	8.37583	8.43888	8.40884	8.23991	8.1777	8.27403	-1.13077	-0.177303	1.13077	down	0.00026342	0.00966717
11185	INMT	indolethylamine N-methyltransferase	6.57424	6.55119	6.65285	6.78226	7.00667	6.85241	1.22068	0.287687	1.22068	up	0.000264277	0.00968056
10973	ASCC3	activating signal cointegrator 1 complex subunit 3	7.45836	7.39621	7.44572	7.58113	7.75414	7.64972	1.1714	0.228233	1.1714	up	0.000264692	0.00968675
10486	CAP2	CAP, adenylate cyclase-associated protein, 2 (yeast)	8.37349	8.4078	8.51636	8.61436	8.5917	8.68294	1.1464	0.197117	1.1464	up	0.000265735	0.00969786
7048	TGFBR2	transforming growth factor beta receptor II	11.8876	11.8826	11.9105	12.0448	11.9707	11.9916	1.07835	0.108827	1.07835	up	0.000265667	0.00969786
84256	FLYWCH1	FLYWCH-type zinc finger 1	5.94197	5.94197	6.00425	6.35675	6.13834	6.32098	1.2391	0.309293	1.2391	up	0.000265408	0.00969786
57545	CC2D2A	coiled-coil and C2 domain containing 2A	8.26907	8.22198	8.1841	8.00913	8.01732	8.09254	-1.13712	-0.185387	1.13712	down	0.000268506	0.00977375
54480	CHPF2	chondroitin polymerizing factor 2	9.674	9.66189	9.68326	9.75967	9.88387	9.83121	1.11101	0.151867	1.11101	up	0.000268088	0.00977375
4291	MLF1	myeloid leukemia factor 1	6.32347	6.23122	6.27228	6.03702	6.02803	5.96243	-1.20288	-0.266497	1.20288	down	0.00026856	0.00977375
54386	TERF2IP	telomeric repeat binding factor 2, interacting protein	10.4157	10.4459	10.4561	10.5447	10.5483	10.566	1.08205	0.113767	1.08205	up	0.000269598	0.00978107
57552	NCEH1	neutral cholesterol ester hydrolase 1	7.88606	7.82401	7.84622	8.12329	7.9637	8.146	1.16924	0.225567	1.16924	up	0.000269756	0.00978107
10926	DBF4	DBF4 zinc finger	5.5547	5.71971	5.6347	5.39658	5.12538	5.28148	-1.29106	-0.368557	1.29106	down	0.000269127	0.00978107
10536	P3H3	prolyl 3-hydroxylase 3	7.63356	7.73515	7.61479	7.84444	7.84145	7.95075	1.16289	0.217713	1.16289	up	0.000271026	0.00980906
23621	BACE1	beta-site APP-cleaving enzyme 1	9.11347	9.09038	9.15352	9.25052	9.25015	9.28646	1.10439	0.143253	1.10439	up	0.000271746	0.00982606
728239	MAGED4	melanoma antigen family D4	8.78838	8.80594	8.8174	8.59868	8.64337	8.69089	-1.11697	-0.159593	1.11697	down	0.000275436	0.009923
81557	MAGED4B	melanoma antigen family D4B	8.78838	8.80594	8.8174	8.59868	8.64337	8.69089	-1.11697	-0.159593	1.11697	down	0.000275436	0.009923
2202	EFEMP1	EGF containing fibulin-like extracellular matrix protein 1	8.62173	8.72151	8.65284	8.84745	8.80429	8.83599	1.1203	0.163883	1.1203	up	0.000277713	0.0099959
9236	CCPG1	cell cycle progression 1	7.9353	7.96909	7.92792	8.11113	8.12611	8.09951	1.12361	0.168147	1.12361	up	0.000283878	0.010174
100533483	DYX1C1-CCPG1	DYX1C1-CCPG1 readthrough (NMD candidate)	7.9353	7.96909	7.92792	8.11113	8.12611	8.09951	1.12361	0.168147	1.12361	up	0.000283878	0.010174
1123	CHN1	chimerin 1	10.4494	10.437	10.4544	10.3398	10.3178	10.3465	-1.08087	-0.112187	1.08087	down	0.000283955	0.010174
143903	LAYN	layilin	9.4402	9.47497	9.55627	9.67476	9.60458	9.67748	1.11868	0.161793	1.11868	up	0.000286353	0.0102506
57804	POLD4	polymerase (DNA-directed), delta 4, accessory subunit	9.84542	9.82542	9.85015	9.66829	9.75249	9.6914	-1.09906	-0.13627	1.09906	down	0.000288007	0.0103004
55323	LARP6	La ribonucleoprotein domain family member 6	11.297	11.2881	11.3282	11.1866	11.1866	11.2213	-1.07645	-0.106283	1.07645	down	0.000288887	0.0103225
55288	RHOT1	ras homolog family member T1	8.99941	9.02825	9.06118	9.18229	9.14828	9.19061	1.10505	0.144113	1.10505	up	0.000290264	0.0103384
652	BMP4	bone morphogenetic protein 4	8.13437	8.14848	8.12284	8.2598	8.34506	8.31073	1.12503	0.169967	1.12503	up	0.000290122	0.0103384
2167	FABP4	fatty acid binding protein 4, adipocyte	6.70953	6.85539	6.76312	6.95952	7.04091	7.08963	1.19251	0.254007	1.19251	up	0.000291914	0.0103835
4286	MITF	microphthalmia-associated transcription factor	8.41378	8.36136	8.37478	8.508	8.54889	8.63813	1.13422	0.1817	1.13422	up	0.000293258	0.0104031
18	ABAT	4-aminobutyrate aminotransferase	6.9649	6.92865	6.91233	7.10571	7.17499	7.16839	1.16022	0.214403	1.16022	up	0.000294259	0.0104292
113146	AHNAK2	AHNAK nucleoprotein 2	9.11415	9.1699	9.06977	8.96989	8.98302	8.92446	-1.11637	-0.158817	1.11637	down	0.000295912	0.010469
84918	LRP11	LDL receptor related protein 11	10.0783	10.1006	10.1113	9.96266	9.93967	10.007	-1.09199	-0.12696	1.09199	down	0.00029645	0.0104705
6563	SLC14A1	solute carrier family 14 (urea transporter), member 1 (Kidd blood group)	10.6882	10.7304	10.7158	10.5876	10.5818	10.623	-1.08223	-0.114013	1.08223	down	0.000296755	0.0104705
100507412	LOC100507412	uncharacterized LOC100507412	9.78847	9.86806	9.93846	9.97409	10.1217	10.0747	1.14221	0.191827	1.14221	up	0.000297199	0.0104768
57185	NIPAL3	NIPA-like domain containing 3	10.3572	10.3616	10.3762	10.4636	10.4685	10.5037	1.08195	0.113637	1.08195	up	0.000298079	0.0104984
6134	RPL10	ribosomal protein L10	7.91885	7.98055	8.00265	7.77561	7.76401	7.81245	-1.1355	-0.183327	1.1355	down	0.000298622	0.0105081
9416	DDX23	DEAD (Asp-Glu-Ala-Asp) box polypeptide 23	7.91698	8.02552	8.00109	7.73848	7.78981	7.82428	-1.14632	-0.197007	1.14632	down	0.00030013	0.0105423
22936	ELL2	elongation factor, RNA polymerase II, 2	10.4824	10.4512	10.4781	10.5885	10.5644	10.5937	1.08047	0.111653	1.08047	up	0.000300091	0.0105423
121601	ANO4	anoctamin 4	9.7569	9.76712	9.77219	9.61494	9.52897	9.67324	-1.11704	-0.159687	1.11704	down	0.000301357	0.0105666
11344	TWF2	twinfilin actin binding protein 2	9.81882	9.85742	9.85572	9.71462	9.72217	9.72615	-1.089	-0.123007	1.089	down	0.000301676	0.0105683
6272	SORT1	sortilin 1	8.50273	8.4287	8.41021	8.5833	8.63401	8.62679	1.1231	0.167487	1.1231	up	0.000307145	0.0107217
54558	SPATA6	spermatogenesis associated 6	5.52564	5.54306	5.43266	5.14687	5.16801	5.25342	-1.24058	-0.31102	1.24058	down	0.000308115	0.010727
345041	HSPD1P5	heat shock protein family D (Hsp60) member 1 pseudogene 5	11.8117	11.806	11.8236	11.7167	11.645	11.7353	-1.08282	-0.11479	1.08282	down	0.000308869	0.0107438
89849	ATG16L2	autophagy related 16 like 2	4.61993	4.42655	4.72913	4.9548	5.01618	4.96801	1.30839	0.387793	1.30839	up	0.000309453	0.0107546
378	ARF4	ADP ribosylation factor 4	12.1392	12.1562	12.133	12.2402	12.2266	12.2297	1.06392	0.0893933	1.06392	up	0.000310625	0.0107838
113612	CYP2U1	cytochrome P450, family 2, subfamily U, polypeptide 1	8.40616	8.30663	8.3291	8.5907	8.49646	8.50354	1.13519	0.182937	1.13519	up	0.000313766	0.0108683
4240	MFGE8	milk fat globule-EGF factor 8 protein	10.6996	10.7162	10.7154	10.7897	10.8388	10.835	1.07981	0.110783	1.07981	up	0.000314106	0.0108683
2700	GJA3	gap junction protein alpha 3	7.66407	7.58052	7.61686	7.45175	7.40523	7.42339	-1.14369	-0.193693	1.14369	down	0.000314055	0.0108683
58538	MPP4	membrane protein, palmitoylated 4	6.21341	6.17515	6.2243	6.37519	6.50361	6.62237	1.22782	0.296103	1.22782	up	0.000323635	0.0111295
3976	LIF	leukemia inhibitory factor	9.41162	9.40903	9.50004	9.59331	9.55508	9.67441	1.12301	0.16737	1.12301	up	0.000324263	0.0111316
1839	HBEGF	heparin-binding EGF-like growth factor	8.0826	8.22449	8.13079	8.29749	8.34263	8.38465	1.14522	0.19563	1.14522	up	0.000325735	0.0111627
7625	ZNF74	zinc finger protein 74	6.10309	5.98774	5.82433	5.6086	5.68298	5.6192	-1.2612	-0.334793	1.2612	down	0.000327616	0.0112174
374462	PTPRQ	protein tyrosine phosphatase, receptor type, Q	4.10753	4.16265	4.35714	4.73898	4.72913	4.47268	1.35456	0.437823	1.35456	up	0.000328097	0.011224
51495	HACD3	3-hydroxyacyl-CoA dehydratase 3	10.9857	11.0356	11.0346	10.8996	10.8947	10.9292	-1.07983	-0.11081	1.07983	down	0.000331613	0.0112952
4172	MCM3	minichromosome maintenance complex component 3	7.05251	6.9919	7.04484	6.70448	6.8645	6.79701	-1.18188	-0.241087	1.18188	down	0.000331599	0.0112952
57496	MKL2	MKL/myocardin-like 2	8.21897	8.22757	8.25582	8.11245	7.99801	8.05415	-1.1323	-0.17925	1.1323	down	0.000331112	0.0112952
220988	HNRNPA3	heterogeneous nuclear ribonucleoprotein A3	10.3966	10.3843	10.4337	10.2615	10.3117	10.2825	-1.08645	-0.11962	1.08645	down	0.000332418	0.0113129
10151	HNRNPA3P1	heterogeneous nuclear ribonucleoprotein A3 pseudogene 1	10.3966	10.3843	10.4337	10.2615	10.3117	10.2825	-1.08645	-0.11962	1.08645	down	0.000332418	0.0113129
9404	LPXN	leupaxin	8.53168	8.5888	8.63062	8.73866	8.76094	8.73149	1.11728	0.159997	1.11728	up	0.000333602	0.0113238
55975	KLHL7	kelch like family member 7	7.22539	7.18509	7.12024	6.98119	6.92445	6.97201	-1.16287	-0.21769	1.16287	down	0.000333368	0.0113238
9411	ARHGAP29	Rho GTPase activating protein 29	7.34807	7.49952	7.4532	7.61563	7.6539	7.6751	1.16039	0.214613	1.16039	up	0.000334861	0.0113469
55974	SLC50A1	solute carrier family 50 (sugar efflux transporter), member 1	7.38864	7.27531	7.2753	7.0829	7.12349	7.08203	-1.16227	-0.216943	1.16227	down	0.000337594	0.0114297
3073	HEXA	hexosaminidase A (alpha polypeptide)	9.46006	9.41267	9.45254	9.29758	9.32981	9.30042	-1.09618	-0.132487	1.09618	down	0.000339965	0.0114803
5311	PKD2	polycystic kidney disease 2 (autosomal dominant)	7.46656	7.48199	7.49793	7.62232	7.69859	7.6905	1.13943	0.18831	1.13943	up	0.00034168	0.0115283
51170	HSD17B11	hydroxysteroid (17-beta) dehydrogenase 11	9.35371	9.3245	9.39651	9.21874	9.1952	9.24004	-1.10209	-0.140247	1.10209	down	0.000343631	0.0115743
51000	SLC35B3	solute carrier family 35 (adenosine 3'-phospho 5'-phosphosulfate transporter), member B3	9.82138	9.83874	9.84089	9.96327	9.98432	9.92445	1.08951	0.123677	1.08951	up	0.00034342	0.0115743
51386	EIF3L	eukaryotic translation initiation factor 3 subunit L	11.3062	11.3117	11.3345	11.1702	11.2163	11.2377	-1.0788	-0.109423	1.0788	down	0.000344985	0.0115896
653513	LOC653513	phosphodiesterase 4D interacting protein-like	6.17369	6.17576	6.26663	6.45045	6.42836	6.48671	1.18905	0.249813	1.18905	up	0.000345264	0.0115896
9659	PDE4DIP	phosphodiesterase 4D interacting protein	6.17369	6.17576	6.26663	6.45045	6.42836	6.48671	1.18905	0.249813	1.18905	up	0.000345264	0.0115896
25805	BAMBI	BMP and activin membrane-bound inhibitor	7.37758	7.34874	7.46477	7.59696	7.56618	7.6585	1.15684	0.210183	1.15684	up	0.000344787	0.0115896
5018	OXA1L	oxidase (cytochrome c) assembly 1-like	9.94965	9.96726	9.95916	9.8303	9.82737	9.86234	-1.08575	-0.118687	1.08575	down	0.000346321	0.0116152
58516	FAM60A	family with sequence similarity 60 member A	7.91973	7.85719	7.84595	7.66822	7.68117	7.72446	-1.13525	-0.183007	1.13525	down	0.000346833	0.0116224
27333	GOLIM4	golgi integral membrane protein 4	8.4957	8.52834	8.50272	8.65364	8.63154	8.73553	1.12089	0.16465	1.12089	up	0.000347493	0.0116275
645	BLVRB	biliverdin reductase B	9.33053	9.305	9.33213	9.09639	9.20001	9.20481	-1.11379	-0.155483	1.11379	down	0.000348496	0.0116399
5698	PSMB9	proteasome subunit beta 9	7.01402	7.0172	7.02941	6.73463	6.86944	6.77026	-1.17183	-0.228767	1.17183	down	0.000349367	0.0116557
6916	TBXAS1	thromboxane A synthase 1	7.08635	7.05009	7.05664	6.77032	6.91439	6.81965	-1.17249	-0.229573	1.17249	down	0.000360339	0.0119127
80279	CDK5RAP3	CDK5 regulatory subunit associated protein 3	7.54537	7.63632	7.60157	7.35572	7.43053	7.40304	-1.1471	-0.19799	1.1471	down	0.00036205	0.0119592
51804	SIX4	SIX homeobox 4	8.99885	9.0245	8.94067	8.87536	8.76665	8.82375	-1.12201	-0.166087	1.12201	down	0.000363769	0.0119835
1809	DPYSL3	dihydropyrimidinase like 3	8.41459	8.421	8.43237	8.26109	8.20457	8.30477	-1.12182	-0.165843	1.12182	down	0.000366956	0.0120605
8364	HIST1H4C	histone cluster 1, H4c	9.75675	9.78719	9.86585	9.62745	9.61262	9.70129	-1.1143	-0.156143	1.1143	down	0.000370369	0.0121422
5034	P4HB	prolyl 4-hydroxylase, beta polypeptide	11.3776	11.3906	11.3463	11.2606	11.1501	11.282	-1.10237	-0.14061	1.10237	down	0.000374199	0.0122474
4638	MYLK	myosin light chain kinase	11.7382	11.7523	11.7059	11.8109	11.8324	11.8503	1.07107	0.09905	1.07107	up	0.000377774	0.0123292
488	ATP2A2	ATPase, Ca++ transporting, cardiac muscle, slow twitch 2	8.27171	8.25441	8.2368	8.39811	8.39681	8.42723	1.11194	0.153077	1.11194	up	0.000380722	0.012399
157285	SGK223	homolog of rat pragma of Rnd2	9.31596	9.43809	9.46542	9.5408	9.59141	9.59788	1.12522	0.170207	1.12522	up	0.000380558	0.012399
330	BIRC3	baculoviral IAP repeat containing 3	5.08027	5.00694	5.14245	5.33355	5.37445	5.57234	1.27476	0.350227	1.27476	up	0.000381648	0.0124086
2969	GTF2I	general transcription factor IIi	9.6593	9.65424	9.63028	9.53693	9.50173	9.53294	-1.08981	-0.124073	1.08981	down	0.000383027	0.0124432
2970	GTF2IP1	general transcription factor IIi pseudogene 1	9.6593	9.65424	9.63028	9.53693	9.50173	9.53294	-1.08981	-0.124073	1.08981	down	0.000383027	0.0124432
100093631	GTF2IP4	general transcription factor IIi, pseudogene 4	9.6593	9.65424	9.63028	9.53693	9.50173	9.53294	-1.08981	-0.124073	1.08981	down	0.000383027	0.0124432
55033	FKBP14	FK506 binding protein 14	7.65754	7.65195	7.70131	7.84391	7.89287	7.81588	1.13337	0.18062	1.13337	up	0.000383999	0.0124644
7162	TPBG	trophoblast glycoprotein	10.0512	10.0236	10.0723	9.91193	9.87132	9.96323	-1.09699	-0.133547	1.09699	down	0.000387581	0.0125581
4173	MCM4	minichromosome maintenance complex component 4	8.29492	8.30392	8.37743	8.18715	8.16268	8.08636	-1.1329	-0.180027	1.1329	down	0.0003882	0.0125594
10678	B3GNT2	UDP-GlcNAc:betaGal beta-1,3-N-acetylglucosaminyltransferase 2	8.00422	8.00231	7.94322	8.11908	8.20735	8.15025	1.12947	0.175643	1.12947	up	0.000390625	0.0126274
440138	ALG11	ALG11, alpha-1,2-mannosyltransferase	6.81866	6.89151	6.86186	7.04633	7.05244	7.11458	1.15972	0.213773	1.15972	up	0.000391219	0.0126363
9724	UTP14C	UTP14, U3 small nucleolar ribonucleoprotein, homolog C (yeast)	6.81866	6.89151	6.86186	7.04633	7.05244	7.11458	1.15972	0.213773	1.15972	up	0.000391219	0.0126363
55640	FLVCR2	feline leukemia virus subgroup C cellular receptor family member 2	5.94648	5.94154	5.82668	6.16833	6.15673	6.18199	1.2009	0.264117	1.2009	up	0.000392098	0.0126543
11245	GPR176	G protein-coupled receptor 176	8.46112	8.45514	8.48881	8.6232	8.62173	8.59848	1.10658	0.146113	1.10658	up	0.000393072	0.0126753
23678	SGK3	serum/glucocorticoid regulated kinase family member 3	8.26188	8.30663	8.35696	8.46887	8.45084	8.50033	1.12105	0.164857	1.12105	up	0.000394171	0.0126853
7423	VEGFB	vascular endothelial growth factor B	9.13141	9.17841	9.19897	8.98998	9.02965	9.05452	-1.10564	-0.14488	1.10564	down	0.000393754	0.0126853
222068	TMED4	transmembrane p24 trafficking protein 4	9.12386	9.17219	9.18794	9.28738	9.317	9.28845	1.09907	0.13628	1.09907	up	0.000394351	0.0126853
100533105	C8orf44-SGK3	C8orf44-SGK3 readthrough	8.26188	8.30663	8.35696	8.46887	8.45084	8.50033	1.12105	0.164857	1.12105	up	0.000394171	0.0126853
10384	BTN3A3	butyrophilin, subfamily 3, member A3	8.00504	7.98234	7.99593	7.76126	7.87884	7.79096	-1.13609	-0.184083	1.13609	down	0.000394806	0.0126896
29967	LRP12	LDL receptor related protein 12	7.85543	7.78763	7.87499	8.02956	7.98371	8.0407	1.13182	0.17864	1.13182	up	0.000395819	0.0127118
25874	MPC2	mitochondrial pyruvate carrier 2	7.88732	7.99124	7.92635	8.11246	8.14913	8.08327	1.13287	0.179983	1.13287	up	0.000400366	0.0128368
8334	HIST1H2AC	histone cluster 1, H2ac	10.1371	10.1193	10.1754	10.2188	10.3077	10.3205	1.10071	0.13843	1.10071	up	0.000400976	0.0128459
6583	SLC22A4	solute carrier family 22 (organic cation/zwitterion transporter), member 4	8.12219	8.10192	8.0705	8.25405	8.23175	8.30663	1.1219	0.16594	1.1219	up	0.000401625	0.0128473
9249	DHRS3	dehydrogenase/reductase (SDR family) member 3	4.95806	4.81567	5.01338	5.20297	5.28084	5.30075	1.25918	0.332483	1.25918	up	0.000401672	0.0128473
6733	SRPK2	SRSF protein kinase 2	7.97596	8.06413	8.10132	8.21685	8.23144	8.22902	1.13181	0.178633	1.13181	up	0.000403109	0.0128723
29091	STXBP6	syntaxin binding protein 6 (amisyn)	6.58928	6.57525	6.67235	6.86101	6.80922	6.84633	1.17004	0.22656	1.17004	up	0.000403074	0.0128723
29088	MRPL15	mitochondrial ribosomal protein L15	10.1815	10.1813	10.2003	10.0423	10.1017	10.0661	-1.08498	-0.117673	1.08498	down	0.000404837	0.012917
54510	PCDH18	protocadherin 18	7.62142	7.6937	7.66815	7.5186	7.46591	7.40136	-1.14801	-0.199133	1.14801	down	0.00040825	0.0130154
140885	SIRPA	signal-regulatory protein alpha	8.4379	8.51054	8.50998	8.59225	8.67801	8.74074	1.13618	0.184193	1.13618	up	0.000410356	0.0130719
155400	NSUN5P1	NOP2/Sun RNA methyltransferase family member 5 pseudogene 1	7.87604	7.87057	7.84959	7.59349	7.65075	7.75048	-1.14909	-0.200493	1.14909	down	0.000414139	0.0131677
875	CBS	cystathionine-beta-synthase	7.71968	7.69865	7.74088	7.81885	7.99906	8.03074	1.17268	0.229813	1.17268	up	0.000414365	0.0131677
260294	NSUN5P2	NOP2/Sun RNA methyltransferase family member 5 pseudogene 2	7.87604	7.87057	7.84959	7.59349	7.65075	7.75048	-1.14909	-0.200493	1.14909	down	0.000414139	0.0131677
102724560	CBSL	cystathionine-beta-synthase like	7.71968	7.69865	7.74088	7.81885	7.99906	8.03074	1.17268	0.229813	1.17268	up	0.000414365	0.0131677
29890	RBM15B	RNA binding motif protein 15B	8.63471	8.62019	8.68006	8.49266	8.48764	8.51006	-1.10819	-0.1482	1.10819	down	0.000419214	0.0132852
100505385	IQCJ-SCHIP1	IQCJ-SCHIP1 readthrough	7.94673	8.04791	8.03826	8.15507	8.21108	8.19923	1.13092	0.177493	1.13092	up	0.000423406	0.01339
29970	SCHIP1	schwannomin interacting protein 1	7.94673	8.04791	8.03826	8.15507	8.21108	8.19923	1.13092	0.177493	1.13092	up	0.000423406	0.01339
105372733	LOC105372733	uncharacterized LOC105372733	7.51221	7.5001	7.54317	7.77527	7.6654	7.68984	1.14209	0.191677	1.14209	up	0.000424868	0.0134255
84271	POLDIP3	polymerase (DNA-directed), delta interacting protein 3	7.95854	7.93192	7.97895	7.72561	7.71806	7.84636	-1.14324	-0.193127	1.14324	down	0.000429201	0.0135081
389558	FAM180A	family with sequence similarity 180 member A	5.28446	5.28736	5.20873	4.86313	4.97706	5.00182	-1.24216	-0.312847	1.24216	down	0.000430878	0.0135501
2542	SLC37A4	solute carrier family 37 (glucose-6-phosphate transporter), member 4	5.96363	6.05076	6.03388	5.81891	5.7045	5.69804	-1.2105	-0.275607	1.2105	down	0.000431731	0.0135661
121512	FGD4	FYVE, RhoGEF and PH domain containing 4	7.00432	6.94529	7.02586	7.22318	7.15047	7.23273	1.15693	0.210303	1.15693	up	0.000433442	0.013609
7922	SLC39A7	solute carrier family 39 (zinc transporter), member 7	8.83536	8.86457	8.88375	8.99706	9.01457	8.98349	1.09973	0.137147	1.09973	up	0.000434849	0.0136314
9462	RASAL2	RAS protein activator like 2	7.47109	7.48261	7.55171	7.65479	7.72026	7.69325	1.13889	0.18763	1.13889	up	0.000434678	0.0136314
3115	HLA-DPB1	major histocompatibility complex, class II, DP beta 1	7.66463	7.57005	7.55415	7.40965	7.3915	7.40478	-1.14417	-0.1943	1.14417	down	0.000436637	0.0136765
26156	RSL1D1	ribosomal L1 domain containing 1	8.69463	8.65128	8.72516	8.86628	8.80557	8.85191	1.11026	0.150897	1.11026	up	0.000438151	0.0137022
50	ACO2	aconitase 2	8.75056	8.81414	8.84717	8.57781	8.65767	8.67348	-1.12322	-0.167637	1.12322	down	0.000439377	0.0137296
29953	TRHDE	thyrotropin-releasing hormone degrading enzyme	8.88678	8.94483	8.94128	9.05064	9.05259	9.092	1.1025	0.14078	1.1025	up	0.000440092	0.013741
23641	LDOC1	leucine zipper, down-regulated in cancer 1	9.19032	9.15762	9.25427	9.31656	9.35037	9.37396	1.10667	0.146227	1.10667	up	0.000441349	0.0137584
2800	GOLGA1	golgin A1	4.98956	4.94929	4.95627	5.19925	5.28337	5.31508	1.23188	0.30086	1.23188	up	0.000442029	0.0137687
9314	KLF4	Kruppel-like factor 4 (gut)	7.81706	7.83286	7.92811	7.65529	7.61263	7.71601	-1.14713	-0.198033	1.14713	down	0.00044567	0.0138427
27350	APOBEC3C	apolipoprotein B mRNA editing enzyme, catalytic polypeptide-like 3C	9.43066	9.50609	9.45101	9.29028	9.32147	9.35651	-1.10178	-0.139833	1.10178	down	0.000446165	0.0138427
6447	SCG5	secretogranin V	5.05719	5.00104	5.11104	5.36084	5.29295	5.45771	1.24322	0.314077	1.24322	up	0.000445766	0.0138427
84675	TRIM55	tripartite motif containing 55	8.76249	8.77295	8.77523	8.59668	8.56701	8.67555	-1.11508	-0.157143	1.11508	down	0.00044748	0.0138726
112	ADCY6	adenylate cyclase 6	8.13329	8.17305	8.16576	8.26292	8.35223	8.37105	1.12612	0.171367	1.12612	up	0.000448158	0.0138827
55798	METTL2B	methyltransferase like 2B	6.95036	7.05642	7.06141	7.2812	7.19945	7.2363	1.16171	0.216253	1.16171	up	0.000450109	0.0139321
3992	FADS1	fatty acid desaturase 1	8.38638	8.37278	8.387	8.20901	8.22503	8.25802	-1.11062	-0.151367	1.11062	down	0.000452601	0.013954
90411	MCFD2	multiple coagulation factor deficiency 2	9.63183	9.65026	9.6452	9.80082	9.71772	9.84304	1.10555	0.144763	1.10555	up	0.000452444	0.013954
54206	ERRFI1	ERBB receptor feedback inhibitor 1	10.6125	10.658	10.6929	10.756	10.7706	10.7822	1.08307	0.11513	1.08307	up	0.00045288	0.013954
55182	RNF220	ring finger protein 220	8.02943	8.09143	8.04951	7.88131	7.91667	7.87424	-1.12198	-0.16605	1.12198	down	0.000458759	0.0141
4082	MARCKS	myristoylated alanine-rich protein kinase C substrate	9.31572	9.31247	9.36094	9.2289	9.08988	9.18565	-1.1185	-0.161567	1.1185	down	0.000458662	0.0141
81887	LAS1L	LAS1-like, ribosome biogenesis factor	7.45234	7.46356	7.42455	7.17784	7.25531	7.30171	-1.15018	-0.201863	1.15018	down	0.000459786	0.0141205
966	CD59	CD59 molecule, complement regulatory protein	11.0025	11.0016	10.995	10.9023	10.877	10.9189	-1.07202	-0.100333	1.07202	down	0.00047158	0.0144282
83666	PARP9	poly(ADP-ribose) polymerase family member 9	8.30007	8.30255	8.33218	8.14094	8.17656	8.16032	-1.11136	-0.152327	1.11136	down	0.000473364	0.0144586
553115	PEF1	penta-EF-hand domain containing 1	8.60527	8.62686	8.61811	8.45853	8.46348	8.49816	-1.10447	-0.143357	1.10447	down	0.000475254	0.014505
1528	CYB5A	cytochrome b5 type A (microsomal)	9.57167	9.64705	9.63747	9.73746	9.73099	9.81553	1.10389	0.142597	1.10389	up	0.000476122	0.0145203
4884	NPTX1	neuronal pentraxin I	11.0009	11.0874	11.0585	11.1687	11.1491	11.1664	1.08106	0.112447	1.08106	up	0.000477968	0.0145587
81034	SLC25A32	solute carrier family 25 (mitochondrial folate carrier), member 32	9.39625	9.40257	9.40202	9.74952	9.5481	9.52258	1.15385	0.206453	1.15385	up	0.000478123	0.0145587
388650	FAM69A	family with sequence similarity 69 member A	8.64438	8.69113	8.78398	8.88313	8.83723	8.92265	1.12858	0.174507	1.12858	up	0.00048076	0.0145953
51422	PRKAG2	protein kinase, AMP-activated, gamma 2 non-catalytic subunit	8.51563	8.57509	8.51692	8.66992	8.73666	8.66575	1.11334	0.154897	1.11334	up	0.000480985	0.0145953
205564	SENP5	SUMO1/sentrin specific peptidase 5	6.63897	6.68043	6.60247	6.86715	6.94203	6.80723	1.17407	0.231513	1.17407	up	0.000480102	0.0145953
7112	TMPO	thymopoietin	6.18587	6.07786	6.33565	5.91554	5.87246	5.91394	-1.23042	-0.299147	1.23042	down	0.000485632	0.0147085
4715	NDUFB9	NADH:ubiquinone oxidoreductase subunit B9	11.2609	11.2801	11.2694	11.1975	11.1335	11.17	-1.0741	-0.103127	1.0741	down	0.000485969	0.0147085
58486	ZBED5	zinc finger, BED-type containing 5	9.6803	9.69818	9.69541	9.56561	9.57016	9.58739	-1.08441	-0.11691	1.08441	down	0.000486212	0.0147085
5479	PPIB	peptidylprolyl isomerase B (cyclophilin B)	12.1765	12.2077	12.2073	12.3028	12.2579	12.3183	1.06867	0.09581	1.06867	up	0.000489822	0.014789
4090	SMAD5	SMAD family member 5	10.0044	9.99865	10.0561	9.85818	9.7562	9.93539	-1.12491	-0.169803	1.12491	down	0.000490873	0.0148094
79618	HMBOX1	homeobox containing 1	4.29597	4.26686	4.26686	4.53684	4.65539	4.62374	1.25593	0.32876	1.25593	up	0.000493431	0.0148524
6354	CCL7	chemokine (C-C motif) ligand 7	5.1492	5.0837	5.04816	4.76984	4.70792	4.85271	-1.24562	-0.316863	1.24562	down	0.000493842	0.0148534
1452	CSNK1A1	casein kinase 1, alpha 1	6.23122	6.28833	6.38686	6.52029	6.53366	6.619	1.19376	0.255513	1.19376	up	0.000495686	0.0148884
55266	TMEM19	transmembrane protein 19	7.79991	7.86494	7.87083	7.66082	7.67286	7.68438	-1.12704	-0.17254	1.12704	down	0.000495764	0.0148884
10056	FARSB	phenylalanyl-tRNA synthetase beta subunit	9.17548	9.20673	9.24866	9.08926	9.07323	9.06255	-1.0983	-0.135277	1.0983	down	0.000499095	0.014977
6533	SLC6A6	solute carrier family 6 (neurotransmitter transporter), member 6	8.56623	8.69789	8.64756	8.49903	8.46388	8.43741	-1.12541	-0.170453	1.12541	down	0.00050113	0.0150107
8263	F8A1	coagulation factor VIII-associated 1	10.4467	10.4644	10.4734	10.3114	10.3456	10.3831	-1.08285	-0.114837	1.08285	down	0.000501362	0.0150107
6726	SRP9	signal recognition particle 9kDa	11.4095	11.3969	11.4265	11.3183	11.3162	11.3201	-1.06643	-0.0927933	1.06643	down	0.000501297	0.0150107
474383	F8A2	coagulation factor VIII-associated 2	10.4467	10.4644	10.4734	10.3114	10.3456	10.3831	-1.08285	-0.114837	1.08285	down	0.000501362	0.0150107
474384	F8A3	coagulation factor VIII-associated 3	10.4467	10.4644	10.4734	10.3114	10.3456	10.3831	-1.08285	-0.114837	1.08285	down	0.000501362	0.0150107
7905	REEP5	receptor accessory protein 5	10.7228	10.7728	10.752	10.8383	10.8484	10.8856	1.0779	0.10823	1.0779	up	0.000503555	0.0150649
55120	FANCL	Fanconi anemia complementation group L	7.78392	7.75944	7.88682	7.65376	7.56654	7.61807	-1.14653	-0.19727	1.14653	down	0.000511394	0.015253
151195	CCNYL1	cyclin Y like 1	7.22194	7.17103	7.22434	7.34288	7.55299	7.42152	1.17557	0.23336	1.17557	up	0.000512939	0.0152875
2201	FBN2	fibrillin 2	11.0389	11.0533	11.0779	11.186	11.1214	11.1965	1.08016	0.11124	1.08016	up	0.000519606	0.0154222
255812	SDHAP1	succinate dehydrogenase complex subunit A, flavoprotein pseudogene 1	10.9047	10.8572	10.8512	10.7599	10.7783	10.7592	-1.07572	-0.105297	1.07572	down	0.000519811	0.0154222
727956	SDHAP2	succinate dehydrogenase complex subunit A, flavoprotein pseudogene 2	10.9047	10.8572	10.8512	10.7599	10.7783	10.7592	-1.07572	-0.105297	1.07572	down	0.000519811	0.0154222
1488	CTBP2	C-terminal binding protein 2	9.86799	9.86601	9.81185	9.69903	9.72493	9.74913	-1.08994	-0.124253	1.08994	down	0.00051951	0.0154222
6389	SDHA	succinate dehydrogenase complex subunit A, flavoprotein (Fp)	10.9047	10.8572	10.8512	10.7599	10.7783	10.7592	-1.07572	-0.105297	1.07572	down	0.000519811	0.0154222
283149	BCL9L	B-cell CLL/lymphoma 9-like	8.36742	8.37729	8.33029	8.48977	8.49624	8.53526	1.10861	0.148757	1.10861	up	0.000521165	0.0154455
29126	CD274	CD274 molecule	5.29481	5.19538	5.35773	5.49415	5.78935	5.61693	1.2753	0.350837	1.2753	up	0.000521382	0.0154455
54741	LEPROT	leptin receptor overlapping transcript	11.4443	11.4296	11.4674	11.5584	11.5206	11.5509	1.06897	0.0962267	1.06897	up	0.000524825	0.0155358
55742	PARVA	parvin alpha	9.56135	9.60683	9.57277	9.68428	9.69012	9.76177	1.09561	0.13174	1.09561	up	0.000527362	0.0155689
58189	WFDC1	WAP four-disulfide core domain 1	8.52034	8.48605	8.48823	8.59279	8.67467	8.71905	1.12036	0.163963	1.12036	up	0.00052695	0.0155689
23659	PLA2G15	phospholipase A2 group XV	7.91961	7.90871	7.98699	8.06604	8.18737	8.11092	1.13525	0.183007	1.13525	up	0.000527523	0.0155689
8500	PPFIA1	protein tyrosine phosphatase, receptor type, f polypeptide (PTPRF), interacting protein (liprin), alpha 1	7.02948	7.06276	7.032	7.20547	7.34541	7.21714	1.16038	0.214593	1.16038	up	0.000534818	0.0156958
116085	SLC22A12	solute carrier family 22 (organic anion/urate transporter), member 12	5.8117	5.8616	5.8117	5.58192	5.54522	5.58305	-1.19604	-0.25827	1.19604	down	0.000535414	0.0156958
84317	CCDC115	coiled-coil domain containing 115	8.85499	8.86886	8.90144	8.74487	8.7025	8.75694	-1.10215	-0.140327	1.10215	down	0.000535184	0.0156958
2355	FOSL2	FOS-like antigen 2	8.25054	8.29375	8.22732	8.39357	8.39287	8.4716	1.11895	0.162143	1.11895	up	0.000536544	0.0157172
6382	SDC1	syndecan 1	7.42261	7.49419	7.544	7.23888	7.33086	7.28009	-1.15161	-0.203657	1.15161	down	0.000539985	0.0158062
3329	HSPD1	heat shock protein family D (Hsp60) member 1	3.7297	4.10583	3.35831	4.57458	4.74691	4.11149	1.67758	0.74638	1.67758	up	0.000540825	0.015819
56975	FAM20C	family with sequence similarity 20 member C	9.04116	8.95263	8.98608	8.83367	8.80664	8.88519	-1.11069	-0.151457	1.11069	down	0.00054127	0.0158203
10955	SERINC3	serine incorporator 3	10.1839	10.2152	10.2309	10.3107	10.3079	10.3486	1.08102	0.112393	1.08102	up	0.000549168	0.0160154
285464	CRIPAK	cysteine-rich PAK1 inhibitor	9.62846	9.63199	9.68323	9.47506	9.54167	9.53385	-1.09508	-0.131033	1.09508	down	0.000549695	0.0160189
79912	PYROXD1	pyridine nucleotide-disulphide oxidoreductase domain 1	8.11943	8.03892	8.10384	8.24356	8.22871	8.27456	1.11849	0.161547	1.11849	up	0.000552982	0.0161028
25904	CNOT10	CCR4-NOT transcription complex subunit 10	7.33384	7.25071	7.32691	7.04556	7.14584	7.10651	-1.1523	-0.204517	1.1523	down	0.000553495	0.0161058
54809	SAMD9	sterile alpha motif domain containing 9	8.19996	8.28077	8.24833	8.05142	7.97577	8.1327	-1.14054	-0.189723	1.14054	down	0.000557664	0.0162032
25840	METTL7A	methyltransferase like 7A	7.99483	7.991	8.12489	7.86701	7.78184	7.87057	-1.14639	-0.1971	1.14639	down	0.000564273	0.016371
11103	KRR1	KRR1, small subunit (SSU) processome component, homolog (yeast)	9.28696	9.27223	9.27781	9.17769	9.00689	9.13924	-1.12589	-0.17106	1.12589	down	0.000564114	0.016371
1021	CDK6	cyclin-dependent kinase 6	9.79612	9.78102	9.85213	9.92798	9.90954	10.0079	1.10092	0.138707	1.10092	up	0.000568018	0.0164578
54985	HCFC1R1	host cell factor C1 regulator 1 (XPO1 dependent)	9.41233	9.41989	9.42957	9.29965	9.28369	9.31631	-1.08727	-0.120713	1.08727	down	0.000568103	0.0164578
3145	HMBS	hydroxymethylbilane synthase	8.69352	8.6533	8.69189	8.53706	8.53706	8.54866	-1.10087	-0.138643	1.10087	down	0.000568679	0.0164624
6603	SMARCD2	SWI/SNF related, matrix associated, actin dependent regulator of chromatin, subfamily d, member 2	7.7604	7.81971	7.81959	7.50422	7.60994	7.67331	-1.15195	-0.204077	1.15195	down	0.000569485	0.0164736
201595	STT3B	STT3B, subunit of the oligosaccharyltransferase complex (catalytic)	10.4121	10.4275	10.492	10.3461	10.2293	10.3269	-1.10428	-0.143107	1.10428	down	0.000570248	0.0164774
5189	PEX1	peroxisomal biogenesis factor 1	6.10385	6.26912	6.26093	5.80954	5.88748	6.02651	-1.2341	-0.303457	1.2341	down	0.000570452	0.0164774
369	ARAF	A-Raf proto-oncogene, serine/threonine kinase	7.05767	6.96338	6.97316	7.16322	7.23274	7.21152	1.15223	0.204423	1.15223	up	0.000572159	0.0165145
10099	TSPAN3	tetraspanin 3	11.2852	11.233	11.2632	11.3372	11.3669	11.3789	1.07214	0.10049	1.07214	up	0.000573183	0.016532
4921	DDR2	discoidin domain receptor tyrosine kinase 2	10.3871	10.3784	10.3955	10.4635	10.5362	10.4973	1.08072	0.111987	1.08072	up	0.000574223	0.0165498
57761	TRIB3	tribbles pseudokinase 3	7.86743	7.89283	7.98553	8.05053	8.13956	8.10569	1.1355	0.18333	1.1355	up	0.000576374	0.0165872
79016	DDA1	DET1 and DDB1 associated 1	9.91033	9.91171	9.85184	9.97643	10.0743	10.0241	1.09708	0.133667	1.09708	up	0.000578066	0.0166119
56005	MYDGF	myeloid-derived growth factor	11.327	11.3237	11.2785	11.3732	11.444	11.4425	1.07933	0.11014	1.07933	up	0.000582866	0.0167228
3667	IRS1	insulin receptor substrate 1	8.98142	9.00551	8.99847	8.8563	8.81575	8.89667	-1.10106	-0.138893	1.10106	down	0.000584385	0.0167228
29103	DNAJC15	DnaJ heat shock protein family (Hsp40) member C15	9.96704	10.0032	10.0495	10.1333	10.0988	10.2055	1.10135	0.13927	1.10135	up	0.000584432	0.0167228
26064	RAI14	retinoic acid induced 14	10.5618	10.5812	10.6152	10.6974	10.6799	10.6949	1.07524	0.104657	1.07524	up	0.000583461	0.0167228
395	ARHGAP6	Rho GTPase activating protein 6	6.71052	6.75742	6.80252	6.96757	6.92871	7.0137	1.15924	0.213173	1.15924	up	0.000586281	0.0167623
7091	TLE4	transducin like enhancer of split 4	8.01944	8.08363	8.09077	8.28426	8.20437	8.20776	1.12312	0.167517	1.12312	up	0.000587445	0.0167833
10186	LHFP	lipoma HMGIC fusion partner	8.31429	8.40544	8.33635	8.47575	8.53706	8.51829	1.116	0.15834	1.116	up	0.000593496	0.0169316
140876	FAM65C	family with sequence similarity 65 member C	6.04686	6.04959	6.18266	5.78281	5.81264	5.87995	-1.20406	-0.267903	1.20406	down	0.000595646	0.0169647
1073	CFL2	cofilin 2 (muscle)	10.3781	10.417	10.4199	10.5485	10.4717	10.5656	1.08947	0.123627	1.08947	up	0.000595949	0.0169647
7140	TNNT3	troponin T type 3 (skeletal, fast)	5.95469	5.96625	5.94137	5.66712	5.7257	5.72455	-1.18782	-0.248313	1.18782	down	0.000608657	0.0172889
677800	SNORA12	small nucleolar RNA, H/ACA box 12	6.82022	6.84558	6.79609	6.47815	6.62752	6.64256	-1.17926	-0.237887	1.17926	down	0.000611241	0.0173373
390	RND3	Rho family GTPase 3	11.1697	11.1889	11.237	11.096	11.0659	11.1136	-1.07675	-0.10668	1.07675	down	0.000612323	0.0173555
90993	CREB3L1	cAMP responsive element binding protein 3-like 1	9.34311	9.31028	9.31112	9.43249	9.43648	9.4574	1.0872	0.12062	1.0872	up	0.000613018	0.0173627
79027	ZNF655	zinc finger protein 655	7.55201	7.44264	7.56474	7.68245	7.70232	7.7542	1.14329	0.193193	1.14329	up	0.000615157	0.0174107
79083	MLPH	melanophilin	7.86649	7.88397	7.85601	7.6822	7.70591	7.73092	-1.11921	-0.16248	1.11921	down	0.000618437	0.017491
10084	PQBP1	polyglutamine binding protein 1	9.1058	9.09076	9.08399	8.93277	8.93894	9.0036	-1.09815	-0.13508	1.09815	down	0.000620367	0.0175329
1054	CEBPG	CCAAT/enhancer binding protein (C/EBP), gamma	7.59596	7.69293	7.6399	7.80492	7.84781	7.80312	1.1295	0.175687	1.1295	up	0.000620936	0.0175364
23258	DENND5A	DENN/MADD domain containing 5A	9.7602	9.82542	9.78892	9.86824	9.96683	9.94381	1.09793	0.13478	1.09793	up	0.000626403	0.0175983
283464	GXYLT1	glucoside xylosyltransferase 1	6.48204	6.57175	6.51931	6.73044	6.70345	6.87191	1.18446	0.244233	1.18446	up	0.000625888	0.0175983
80856	KIAA1715	KIAA1715	8.86091	8.87659	8.89716	8.98179	9.02746	9.02105	1.09572	0.13188	1.09572	up	0.000626704	0.0175983
84939	MUM1	melanoma associated antigen (mutated) 1	7.62395	7.5677	7.70822	7.2057	7.46679	7.42524	-1.20362	-0.26738	1.20362	down	0.000625383	0.0175983
59307	SIGIRR	single immunoglobulin and toll-interleukin 1 receptor (TIR) domain	8.02981	7.99408	7.95246	7.75632	7.86035	7.82883	-1.13049	-0.17695	1.13049	down	0.000625218	0.0175983
373	TRIM23	tripartite motif containing 23	7.2188	7.30515	7.13817	7.44957	7.37464	7.53371	1.17441	0.231933	1.17441	up	0.000624962	0.0175983
58505	OSTC	oligosaccharyltransferase complex subunit (non-catalytic)	11.7758	11.8191	11.804	11.8813	11.8799	11.9133	1.06573	0.0918367	1.06573	up	0.000628264	0.0176058
55268	ECHDC2	enoyl-CoA hydratase domain containing 2	5.45831	5.33452	5.69221	5.06969	5.12977	5.18442	-1.28972	-0.367053	1.28972	down	0.000628762	0.0176058
23443	SLC35A3	solute carrier family 35 (UDP-N-acetylglucosamine (UDP-GlcNAc) transporter), member A3	6.84202	6.80521	6.89889	7.10625	6.98207	7.21915	1.19233	0.253783	1.19233	up	0.000628335	0.0176058
3309	HSPA5	heat shock protein family A (Hsp70) member 5	12.024	12.0637	12.0924	12.1308	12.1608	12.2199	1.07962	0.11052	1.07962	up	0.000628145	0.0176058
100528019	HSPB2-C11orf52	HSPB2-C11orf52 readthrough (NMD candidate)	5.28474	5.22277	5.18497	5.53106	5.46627	5.5255	1.21149	0.276783	1.21149	up	0.000629649	0.0176181
91894	C11orf52	chromosome 11 open reading frame 52	5.28474	5.22277	5.18497	5.53106	5.46627	5.5255	1.21149	0.276783	1.21149	up	0.000629649	0.0176181
5118	PCOLCE	procollagen C-endopeptidase enhancer	10.0762	10.1387	10.1634	9.99243	9.98137	10.0299	-1.09041	-0.124877	1.09041	down	0.000632303	0.0176672
81669	CCNL2	cyclin L2	9.22865	9.24084	9.20293	9.33088	9.33687	9.38706	1.09237	0.127463	1.09237	up	0.000634945	0.0177033
7292	TNFSF4	tumor necrosis factor superfamily member 4	8.92122	8.96011	8.99864	9.0638	9.10251	9.14613	1.10508	0.144157	1.10508	up	0.000634923	0.0177033
4763	NF1	neurofibromin 1	4.69718	4.49012	4.44743	4.87897	4.89081	4.8954	1.26882	0.343483	1.26882	up	0.0006384	0.017787
23588	KLHDC2	kelch domain containing 2	10.2147	10.2557	10.2546	10.1465	10.0416	10.14	-1.09607	-0.13234	1.09607	down	0.00064048	0.0178198
8677	STX10	syntaxin 10	9.80393	9.75338	9.74943	9.61145	9.67654	9.64413	-1.09041	-0.124873	1.09041	down	0.000640469	0.0178198
3383	ICAM1	intercellular adhesion molecule 1	6.11222	6.07983	6.22238	6.30866	6.42919	6.48776	1.20614	0.270393	1.20614	up	0.000642441	0.0178488
54477	PLEKHA5	pleckstrin homology domain containing A5	8.91526	8.91759	8.96149	8.81489	8.7264	8.81144	-1.10742	-0.147203	1.10742	down	0.00064519	0.0179002
84541	KBTBD8	kelch repeat and BTB (POZ) domain containing 8	4.34261	4.55963	4.5103	4.78954	4.82194	4.8037	1.26069	0.334213	1.26069	up	0.000645904	0.0179011
58155	PTBP2	polypyrimidine tract binding protein 2	5.33597	5.32689	5.33837	5.11414	5.05662	4.95008	-1.22558	-0.293463	1.22558	down	0.000647046	0.0179011
79642	ARSJ	arylsulfatase family member J	8.53172	8.52477	8.63284	8.71206	8.69668	8.76383	1.11812	0.16108	1.11812	up	0.000646429	0.0179011
286527	TMSB15B	thymosin beta 15B	7.97704	7.92916	8.00561	7.83052	7.76409	7.81245	-1.12369	-0.16825	1.12369	down	0.000649769	0.0179512
6627	SNRPA1	small nuclear ribonucleoprotein polypeptide A'	9.37133	9.36796	9.35006	9.10311	9.27193	9.22074	-1.1208	-0.164523	1.1208	down	0.000652804	0.0180094
9627	SNCAIP	synuclein alpha interacting protein	6.14512	6.05076	6.08616	5.8202	5.83606	5.88414	-1.18691	-0.247213	1.18691	down	0.000653812	0.0180124
4678	NASP	nuclear autoantigenic sperm protein (histone-binding)	8.7783	8.73435	8.71218	8.57986	8.60836	8.61472	-1.10239	-0.14063	1.10239	down	0.000654879	0.0180291
91289	LMF2	lipase maturation factor 2	9.47823	9.49845	9.50945	9.59086	9.69316	9.60756	1.09821	0.13515	1.09821	up	0.000657761	0.0180831
196	AHR	aryl hydrocarbon receptor	8.52529	8.5361	8.5511	8.78232	8.63388	8.69314	1.12165	0.165617	1.12165	up	0.00066208	0.0181638
7155	TOP2B	topoisomerase (DNA) II beta	10.9936	11.02	11.0651	10.9304	10.8925	10.9329	-1.07748	-0.107657	1.07748	down	0.000663962	0.0181901
5099	PCDH7	protocadherin 7	6.24972	6.29229	6.20215	6.39476	6.56189	6.55228	1.19327	0.254923	1.19327	up	0.000670784	0.0183514
105372868	LOC105372868	uncharacterized LOC105372868	7.65646	7.64332	7.55342	7.39092	7.40321	7.4811	-1.14287	-0.192657	1.14287	down	0.000672521	0.0183669
105372935	LOC105372935	uncharacterized LOC105372935	7.65646	7.64332	7.55342	7.39092	7.40321	7.4811	-1.14287	-0.192657	1.14287	down	0.000672521	0.0183669
80255	SLC35F5	solute carrier family 35 member F5	9.68858	9.78345	9.79447	9.97637	9.85035	9.90662	1.1139	0.155613	1.1139	up	0.000672752	0.0183669
11274	USP18	ubiquitin specific peptidase 18	7.65646	7.64332	7.55342	7.39092	7.40321	7.4811	-1.14287	-0.192657	1.14287	down	0.000672521	0.0183669
102725067	LOC102725067	uncharacterized LOC102725067	7.65646	7.64332	7.55342	7.39092	7.40321	7.4811	-1.14287	-0.192657	1.14287	down	0.000672521	0.0183669
105379548	LOC105379548	uncharacterized LOC105379548	7.65646	7.64332	7.55342	7.39092	7.40321	7.4811	-1.14287	-0.192657	1.14287	down	0.000672521	0.0183669
105372942	LOC105372942	uncharacterized LOC105372942	7.65646	7.64332	7.55342	7.39092	7.40321	7.4811	-1.14287	-0.192657	1.14287	down	0.000672521	0.0183669
105377182	LOC105377182	uncharacterized LOC105377182	7.65646	7.64332	7.55342	7.39092	7.40321	7.4811	-1.14287	-0.192657	1.14287	down	0.000672521	0.0183669
2677	GGCX	gamma-glutamyl carboxylase	7.88156	8.03371	8.01602	8.13142	8.15546	8.22945	1.14473	0.195013	1.14473	up	0.000674886	0.0183793
11228	RASSF8	Ras association (RalGDS/AF-6) domain family (N-terminal) member 8	8.11353	8.16805	8.29639	8.3613	8.36123	8.45564	1.14875	0.200067	1.14875	up	0.000675541	0.0183793
100526760	ABHD14A-ACY1	ABHD14A-ACY1 readthrough	7.44827	7.46808	7.47611	7.2606	7.27819	7.32132	-1.13088	-0.17745	1.13088	down	0.000675386	0.0183793
95	ACY1	aminoacylase 1	7.44827	7.46808	7.47611	7.2606	7.27819	7.32132	-1.13088	-0.17745	1.13088	down	0.000675386	0.0183793
16	AARS	alanyl-tRNA synthetase	8.8592	8.87306	8.89905	8.95616	9.10382	9.05293	1.1177	0.160533	1.1177	up	0.00067393	0.0183793
3998	LMAN1	lectin, mannose-binding, 1	8.09747	8.03281	7.97395	8.15604	8.24483	8.23985	1.13197	0.17883	1.13197	up	0.000680854	0.018511
51088	KLHL5	kelch like family member 5	8.94674	8.95482	8.93566	9.07585	9.06004	9.07331	1.08975	0.123993	1.08975	up	0.000681993	0.0185292
10602	CDC42EP3	CDC42 effector protein (Rho GTPase binding) 3	11.7381	11.7476	11.7831	11.8446	11.8313	11.8697	1.06605	0.09227	1.06605	up	0.000682593	0.0185327
55337	C19orf66	chromosome 19 open reading frame 66	8.99096	8.97606	9.0402	8.88942	8.78394	8.8775	-1.1112	-0.15212	1.1112	down	0.000686763	0.0186331
51149	C5orf45	chromosome 5 open reading frame 45	9.49945	9.5287	9.51728	9.4004	9.40505	9.39313	-1.08344	-0.115617	1.08344	down	0.000687339	0.0186358
51360	MBTPS2	membrane bound transcription factor peptidase, site 2	9.98855	9.95168	9.97792	10.0448	10.1072	10.1317	1.08812	0.121837	1.08812	up	0.00069064	0.0187054
167153	PAPD4	PAP associated domain containing 4	8.01565	7.92986	7.92636	7.78808	7.67614	7.82288	-1.14466	-0.194923	1.14466	down	0.000692211	0.0187292
10892	MALT1	MALT1 paracaspase	6.49876	6.6911	6.73714	6.95455	6.95263	6.83447	1.2071	0.27155	1.2071	up	0.000695453	0.0187782
4141	MARS	methionyl-tRNA synthetase	9.26125	9.19467	9.24499	9.31146	9.40803	9.43106	1.10948	0.14988	1.10948	up	0.000695399	0.0187782
1649	DDIT3	DNA damage inducible transcript 3	6.51847	6.53916	6.59411	6.70364	6.79461	6.8212	1.16681	0.22257	1.16681	up	0.000697662	0.0187863
2063	NR2F6	nuclear receptor subfamily 2 group F member 6	7.16289	7.19216	7.08879	7.32558	7.33126	7.35991	1.14153	0.19097	1.14153	up	0.000696937	0.0187863
64114	TMBIM1	transmembrane BAX inhibitor motif containing 1	10.0248	10.0189	10.0427	9.8968	9.89329	9.95267	-1.08263	-0.114537	1.08263	down	0.0007017	0.0188821
64080	RBKS	ribokinase	6.64405	6.63504	6.63233	6.81252	6.87083	6.83246	1.14986	0.201463	1.14986	up	0.000703011	0.0188915
10961	ERP29	endoplasmic reticulum protein 29	9.99439	10.0582	10.0554	9.86369	9.94487	9.91913	-1.09186	-0.126783	1.09186	down	0.000707338	0.018956
11309	SLCO2B1	solute carrier organic anion transporter family member 2B1	6.49276	6.47718	6.32782	6.14046	6.15683	6.233	-1.19402	-0.255823	1.19402	down	0.000705963	0.018956
100527964	LHX4-AS1	LHX4 antisense RNA 1	9.41388	9.42411	9.44119	9.26685	9.31438	9.32714	-1.08945	-0.123603	1.08945	down	0.00070788	0.0189576
84320	ACBD6	acyl-CoA binding domain containing 6	9.41388	9.42411	9.44119	9.26685	9.31438	9.32714	-1.08945	-0.123603	1.08945	down	0.00070788	0.0189576
25782	RAB3GAP2	RAB3 GTPase activating non-catalytic protein subunit 2	8.69334	8.74909	8.77016	9.02687	8.81005	8.98056	1.15	0.20163	1.15	up	0.000711156	0.0190324
6791	AURKAPS1	aurora kinase A pseudogene 1	8.69334	8.74909	8.77016	9.02687	8.81005	8.98056	1.15	0.20163	1.15	up	0.000711156	0.0190324
6790	AURKA	aurora kinase A	8.69334	8.74909	8.77016	9.02687	8.81005	8.98056	1.15	0.20163	1.15	up	0.000711156	0.0190324
3430	IFI35	interferon induced protein 35	7.12244	7.06689	7.10813	6.74488	6.89322	6.95272	-1.17735	-0.235547	1.17735	down	0.000721806	0.0192519
22943	DKK1	dickkopf WNT signaling pathway inhibitor 1	9.50305	9.46571	9.54519	9.63577	9.60657	9.64828	1.09093	0.125557	1.09093	up	0.000725646	0.0193403
79746	ECHDC3	enoyl-CoA hydratase domain containing 3	7.38058	7.35697	7.4331	7.17624	7.21924	7.2242	-1.13576	-0.183657	1.13576	down	0.000726102	0.0193403
6628	SNRPB	small nuclear ribonucleoprotein polypeptides B and B1	11.3611	11.3705	11.377	11.2104	11.2971	11.2819	-1.07654	-0.106403	1.07654	down	0.000727293	0.0193589
10725	NFAT5	nuclear factor of activated T-cells 5, tonicity-responsive	6.62533	6.65175	6.59672	6.8041	6.87882	6.81247	1.15444	0.207197	1.15444	up	0.000731557	0.0194592
1911	PHC1	polyhomeotic homolog 1 (Drosophila)	5.51709	5.55421	5.50831	5.19081	5.24077	5.32353	-1.20985	-0.274833	1.20985	down	0.000733886	0.019508
23275	POFUT2	protein O-fucosyltransferase 2	8.60051	8.62161	8.70192	8.73602	8.83855	8.85082	1.12281	0.167117	1.12281	up	0.000734932	0.0195226
7508	XPC	xeroderma pigmentosum, complementation group C	9.06977	9.10812	9.18703	8.91255	8.99951	8.98563	-1.114	-0.155743	1.114	down	0.000743744	0.0196761
9782	MATR3	matrin 3	11.8026	11.8227	11.8363	11.7491	11.6982	11.738	-1.06592	-0.0921	1.06592	down	0.000744712	0.0196761
5832	ALDH18A1	aldehyde dehydrogenase 18 family member A1	9.73347	9.76101	9.75391	9.85187	9.84726	9.88229	1.07998	0.11101	1.07998	up	0.000744302	0.0196761
2048	EPHB2	EPH receptor B2	6.60925	6.56083	6.54603	6.30335	6.36278	6.38861	-1.1651	-0.220457	1.1651	down	0.000743623	0.0196761
214	ALCAM	activated leukocyte cell adhesion molecule	9.70786	9.67032	9.68013	9.77474	9.79792	9.8768	1.09458	0.130383	1.09458	up	0.000744078	0.0196761
9716	AQR	aquarius intron-binding spliceosomal factor	7.257	7.26364	7.24477	6.94641	7.08587	7.10181	-1.15704	-0.21044	1.15704	down	0.000746968	0.0197022
2744	GLS	glutaminase	9.48793	9.4352	9.44007	9.5399	9.58834	9.62501	1.09431	0.130017	1.09431	up	0.000747204	0.0197022
10801	SEPT9	septin 9	7.15038	7.23942	7.25719	6.95588	7.07523	6.98279	-1.15751	-0.21103	1.15751	down	0.000746382	0.0197022
91107	TRIM47	tripartite motif containing 47	6.84239	6.72493	6.78953	6.60177	6.5748	6.52291	-1.16403	-0.219123	1.16403	down	0.000749223	0.019729
7779	SLC30A1	solute carrier family 30 (zinc transporter), member 1	9.83506	9.84938	9.77362	9.90515	9.95178	9.9893	1.09383	0.12939	1.09383	up	0.000755209	0.0198601
7994	KAT6A	K(lysine) acetyltransferase 6A	8.70204	8.71689	8.75889	8.58668	8.56336	8.61232	-1.10075	-0.138487	1.10075	down	0.000758492	0.0199065
1719	DHFR	dihydrofolate reductase	5.11715	5.14688	4.99873	5.38805	5.36625	5.36101	1.21772	0.284183	1.21772	up	0.000762773	0.0199789
7126	TNFAIP1	TNF alpha induced protein 1	8.98291	9.03593	9.11397	9.184	9.17898	9.2147	1.10826	0.14829	1.10826	up	0.000765546	0.0200248
54842	MFSD6	major facilitator superfamily domain containing 6	8.07958	8.13998	8.18768	8.01307	7.91756	7.95829	-1.12722	-0.172773	1.12722	down	0.000778012	0.0203104
6696	SPP1	secreted phosphoprotein 1	5.1256	5.06852	5.08993	4.8244	4.85016	4.7439	-1.2214	-0.28853	1.2214	down	0.000777681	0.0203104
6747	SSR3	signal sequence receptor, gamma (translocon-associated protein gamma)	8.02291	8.0007	8.14028	8.2506	8.1861	8.27234	1.13423	0.181717	1.13423	up	0.000777025	0.0203104
23015	GOLGA8A	golgin A8 family member A	8.02453	8.02673	8.03424	7.88562	7.85979	7.88991	-1.10962	-0.15006	1.10962	down	0.00077978	0.0203431
440270	GOLGA8B	golgin A8 family member B	8.02453	8.02673	8.03424	7.88562	7.85979	7.88991	-1.10962	-0.15006	1.10962	down	0.00077978	0.0203431
10814	CPLX2	complexin 2	5.48798	5.45272	5.39734	5.20515	5.19575	5.11114	-1.21027	-0.275333	1.21027	down	0.000780704	0.0203477
10869	USP19	ubiquitin specific peptidase 19	8.93678	8.87421	8.88831	8.72143	8.79009	8.7697	-1.10142	-0.13936	1.10142	down	0.000781331	0.0203477
80336	PABPC1L	poly(A) binding protein, cytoplasmic 1-like	8.05707	8.06108	8.03459	7.86317	7.88815	7.93375	-1.11411	-0.15589	1.11411	down	0.000781508	0.0203477
1212	CLTB	clathrin, light chain B	9.61927	9.65443	9.6222	9.72753	9.73585	9.78839	1.0857	0.118623	1.0857	up	0.000783316	0.0203812
7296	TXNRD1	thioredoxin reductase 1	11.4474	11.4654	11.4768	11.5287	11.564	11.5709	1.06537	0.09136	1.06537	up	0.000786068	0.0204123
57292	KIR2DL5A	killer cell immunoglobulin-like receptor, two domains, long cytoplasmic tail, 5A	6.66599	6.60921	6.7521	6.51617	6.37776	6.40719	-1.18268	-0.24206	1.18268	down	0.000787955	0.0204209
51714	SELT	selenoprotein T	10.3096	10.2957	10.3342	10.3835	10.445	10.4414	1.07931	0.110107	1.07931	up	0.000787464	0.0204209
79979	TRMT2B	tRNA methyltransferase 2 homolog B	6.04713	5.99613	6.04665	6.2781	6.25933	6.23337	1.17037	0.226963	1.17037	up	0.000787732	0.0204209
553128	KIR2DL5B	killer cell immunoglobulin-like receptor, two domains, long cytoplasmic tail, 5B	6.66599	6.60921	6.7521	6.51617	6.37776	6.40719	-1.18268	-0.24206	1.18268	down	0.000787955	0.0204209
65083	NOL6	nucleolar protein 6	7.2319	7.31963	7.29021	7.45342	7.45586	7.46774	1.13165	0.178427	1.13165	up	0.000791402	0.0204967
3054	HCFC1	host cell factor C1	8.68309	8.63587	8.67668	8.49698	8.51734	8.56017	-1.1022	-0.140383	1.1022	down	0.00079878	0.0206583
55089	SLC38A4	solute carrier family 38, member 4	5.5254	5.36224	5.58901	5.69594	5.8839	5.83574	1.24227	0.312977	1.24227	up	0.000799742	0.0206583
284615	ANKRD34A	ankyrin repeat domain 34A	6.17243	6.121	6.11461	6.3801	6.29608	6.49119	1.19177	0.25311	1.19177	up	0.000802484	0.0207156
51175	TUBE1	tubulin, epsilon 1	6.51561	6.5031	6.63966	6.80433	6.76321	6.75829	1.16674	0.222487	1.16674	up	0.000804969	0.0207513
4211	MEIS1	Meis homeobox 1	8.35826	8.36103	8.38294	8.18795	8.19998	8.26672	-1.10895	-0.149193	1.10895	down	0.000805451	0.0207513
729991	BORCS8	BLOC-1 related complex subunit 8	5.6214	5.59557	5.53997	5.85286	6.00975	5.76926	1.22403	0.291643	1.22403	up	0.000808439	0.0207962
140886	PABPC5	poly(A) binding protein, cytoplasmic 5	4.7385	5.00056	4.94122	4.52903	4.57736	4.56137	-1.26357	-0.337507	1.26357	down	0.000808759	0.0207962
339804	C2orf74	chromosome 2 open reading frame 74	6.35094	6.26215	6.36894	6.14211	6.06311	6.06519	-1.17871	-0.237207	1.17871	down	0.000812458	0.0208499
1743	DLST	dihydrolipoamide S-succinyltransferase (E2 component of 2-oxo-glutarate complex)	9.26431	9.35322	9.26891	9.41812	9.43402	9.42583	1.09468	0.13051	1.09468	up	0.000815583	0.0209028
23052	ENDOD1	endonuclease domain containing 1	7.6056	7.59808	7.66952	7.74419	7.81427	7.84243	1.12967	0.175897	1.12967	up	0.00081544	0.0209028
6605	SMARCE1	SWI/SNF related, matrix associated, actin dependent regulator of chromatin, subfamily e, member 1	10.2354	10.2289	10.2846	10.1779	10.11	10.1028	-1.08627	-0.119387	1.08627	down	0.00081927	0.02097
54708	MARCH5	membrane associated ring-CH-type finger 5	7.23544	7.26256	7.41811	7.10123	7.07281	7.09323	-1.16173	-0.21628	1.16173	down	0.000820748	0.0209942
51148	CERCAM	cerebral endothelial cell adhesion molecule	8.20012	8.25861	8.26087	8.35849	8.38157	8.43919	1.11205	0.153217	1.11205	up	0.000824874	0.0210617
117246	FTSJ3	FtsJ homolog 3 (E. coli)	9.62523	9.66164	9.65636	9.44225	9.54171	9.55138	-1.09883	-0.135963	1.09883	down	0.000829254	0.021143
57506	MAVS	mitochondrial antiviral signaling protein	7.56665	7.6	7.57788	7.74122	7.77187	7.71809	1.11901	0.162217	1.11901	up	0.000828937	0.021143
10783	NEK6	NIMA-related kinase 6	9.20614	9.15218	9.22006	8.9836	9.10173	9.05187	-1.10731	-0.14706	1.10731	down	0.000841441	0.021426
283417	DPY19L2	dpy-19-like 2 (C. elegans)	4.11062	3.69846	3.96485	4.2812	4.36424	4.3766	1.33426	0.416037	1.33426	up	0.000843921	0.0214491
26091	HERC4	HECT and RLD domain containing E3 ubiquitin protein ligase 4	9.27612	9.30431	9.36441	9.4373	9.43379	9.45512	1.09211	0.127123	1.09211	up	0.000843985	0.0214491
57205	ATP10D	ATPase, class V, type 10D	4.5385	4.75145	4.73337	4.97313	4.96135	5.06621	1.25335	0.32579	1.25335	up	0.000845508	0.0214739
4869	NPM1	nucleophosmin (nucleolar phosphoprotein B23, numatrin)	10.8068	10.7804	10.8082	10.7096	10.6737	10.7166	-1.07065	-0.0984867	1.07065	down	0.000849237	0.0215206
2861	GPR37	G protein-coupled receptor 37 (endothelin receptor type B-like)	8.33816	8.33174	8.32201	8.4552	8.49452	8.45489	1.10005	0.137567	1.10005	up	0.000849533	0.0215206
80267	EDEM3	ER degradation enhancer, mannosidase alpha-like 3	8.30891	8.33892	8.32301	8.50878	8.42625	8.47186	1.106	0.14535	1.106	up	0.000851517	0.0215338
9415	FADS2	fatty acid desaturase 2	8.37798	8.35664	8.34565	8.2398	8.23095	8.16554	-1.10803	-0.147993	1.10803	down	0.000851696	0.0215338
8674	VAMP4	vesicle associated membrane protein 4	7.94715	7.92462	7.91583	7.7482	7.78981	7.78654	-1.11292	-0.15435	1.11292	down	0.000852522	0.0215408
28978	TMEM14A	transmembrane protein 14A	9.91377	9.97164	9.95564	9.83229	9.85238	9.81947	-1.08095	-0.112303	1.08095	down	0.00085517	0.0215939
79939	SLC35E1	solute carrier family 35 member E1	8.40435	8.47603	8.49702	8.57949	8.60062	8.65536	1.11164	0.15269	1.11164	up	0.000858391	0.0216613
8202	NCOA3	nuclear receptor coactivator 3	8.37101	8.45122	8.4916	8.6129	8.54935	8.64366	1.12041	0.164027	1.12041	up	0.000865721	0.0218117
84693	MCEE	methylmalonyl CoA epimerase	7.72468	7.82741	7.75463	7.86878	8.01053	8.00796	1.14355	0.193517	1.14355	up	0.000867718	0.0218406
6309	SC5D	sterol-C5-desaturase	8.28001	8.36805	8.25765	8.50322	8.41906	8.47097	1.11924	0.162513	1.11924	up	0.000868674	0.0218507
266812	NAP1L5	nucleosome assembly protein 1-like 5	7.7869	7.78505	7.78242	7.91987	7.94869	7.93773	1.11006	0.15064	1.11006	up	0.000870022	0.0218629
3632	INPP5A	inositol polyphosphate-5-phosphatase A	8.93308	8.99145	9.01111	9.07789	9.12933	9.13374	1.09817	0.135107	1.09817	up	0.000872553	0.0218873
55679	LIMS2	LIM and senescent cell antigen-like domains 2	5.87465	5.85553	5.66507	6.0377	6.06277	6.13087	1.2131	0.278697	1.2131	up	0.000873795	0.0218955
86	ACTL6A	actin like 6A	9.56012	9.52112	9.54087	9.41976	9.44295	9.41678	-1.08238	-0.114207	1.08238	down	0.000876776	0.0219172
25796	PGLS	6-phosphogluconolactonase	9.90333	9.91576	9.8848	9.71079	9.81653	9.79437	-1.09232	-0.1274	1.09232	down	0.000876888	0.0219172
83941	TM2D1	TM2 domain containing 1	9.19513	9.20293	9.21171	9.34075	9.29322	9.33296	1.08602	0.119053	1.08602	up	0.000876878	0.0219172
9435	CHST2	carbohydrate (N-acetylglucosamine-6-O) sulfotransferase 2	6.48874	6.46588	6.54625	6.69331	6.71596	6.70871	1.15325	0.205703	1.15325	up	0.00087651	0.0219172
7453	WARS	tryptophanyl-tRNA synthetase	10.4424	10.5127	10.471	10.5718	10.5654	10.6278	1.08147	0.113	1.08147	up	0.000882073	0.0220188
100133299	LOC100133299	GALI1870	9.51937	9.52979	9.53617	9.38695	9.433	9.42128	-1.08275	-0.1147	1.08275	down	0.000885517	0.0220739
3588	IL10RB	interleukin 10 receptor, beta	8.04959	8.10751	8.16856	8.36832	8.24258	8.25657	1.13336	0.180603	1.13336	up	0.00088563	0.0220739
19	ABCA1	ATP binding cassette subfamily A member 1	9.93435	9.91113	9.96526	9.85324	9.72449	9.81929	-1.10031	-0.137907	1.10031	down	0.000891526	0.0221704
1362	CPD	carboxypeptidase D	9.78756	9.79165	9.85792	9.92135	9.92796	9.93281	1.08297	0.114997	1.08297	up	0.000894592	0.0222052
10398	MYL9	myosin light chain 9	11.788	11.7449	11.765	11.8315	11.8577	11.8785	1.06431	0.08992	1.06431	up	0.000896789	0.022231
6897	TARS	threonyl-tRNA synthetase	10.3118	10.3639	10.3883	10.4523	10.4487	10.5162	1.08502	0.11772	1.08502	up	0.000902614	0.0223472
7035	TFPI	tissue factor pathway inhibitor	9.85461	9.87311	9.94511	10.0196	9.99217	10.0221	1.087	0.120353	1.087	up	0.000904024	0.0223681
5831	PYCR1	pyrroline-5-carboxylate reductase 1	8.69557	8.74873	8.78961	8.89261	8.84936	8.92768	1.10592	0.145247	1.10592	up	0.00090975	0.0224956
7077	TIMP2	TIMP metallopeptidase inhibitor 2	9.71028	9.73041	9.80958	9.84052	9.8875	9.92637	1.09787	0.134707	1.09787	up	0.000911095	0.0225147
100134259	LINC01119	long intergenic non-protein coding RNA 1119	6.86271	6.85539	6.87234	6.6141	6.71201	6.66295	-1.14906	-0.20046	1.14906	down	0.000912833	0.0225293
29101	SSU72	SSU72 homolog, RNA polymerase II CTD phosphatase	10.231	10.2204	10.2475	10.0989	10.1254	10.1558	-1.07642	-0.106247	1.07642	down	0.000912422	0.0225293
10956	OS9	osteosarcoma amplified 9, endoplasmic reticulum lectin	9.15656	9.09216	9.13808	8.95069	9.0276	9.00538	-1.09762	-0.134377	1.09762	down	0.000914952	0.0225675
137695	TMEM68	transmembrane protein 68	7.19152	7.22457	7.12729	6.90642	6.90813	7.06616	-1.16545	-0.22089	1.16545	down	0.000917213	0.0226091
1741	DLG3	discs, large homolog 3 (Drosophila)	7.321	7.24753	7.27587	7.03504	7.10419	7.13466	-1.1409	-0.19017	1.1409	down	0.000919976	0.022663
8460	TPST1	tyrosylprotein sulfotransferase 1	8.88775	8.94825	8.98645	9.09328	9.03518	9.16057	1.11383	0.155527	1.11383	up	0.000924478	0.0227596
1974	EIF4A2	eukaryotic translation initiation factor 4A2	12.1896	12.1782	12.1975	12.1097	12.0622	12.1269	-1.0635	-0.0888167	1.0635	down	0.000925789	0.022766
9397	NMT2	N-myristoyltransferase 2	6.34897	6.45003	6.42335	6.55416	6.74057	6.65216	1.18223	0.241513	1.18223	up	0.000925896	0.022766
54434	SSH1	slingshot protein phosphatase 1	8.21359	8.15028	8.21859	8.29274	8.41326	8.36629	1.11983	0.163277	1.11983	up	0.000927549	0.0227782
10362	HMG20B	high mobility group 20B	8.91949	8.89016	8.86457	8.67613	8.80524	8.73934	-1.11047	-0.15117	1.11047	down	0.000927386	0.0227782
56647	BCCIP	BRCA2 and CDKN1A interacting protein	7.84901	7.79167	7.91649	7.66685	7.6444	7.71567	-1.13033	-0.17675	1.13033	down	0.000930096	0.0228199
60681	FKBP10	FK506 binding protein 10	8.30569	8.2806	8.3255	8.39761	8.49549	8.46974	1.10984	0.15035	1.10984	up	0.000932831	0.0228651
55906	ZC4H2	zinc finger, C4H2 domain containing	6.98403	6.96338	6.94593	6.75021	6.81752	6.74488	-1.1436	-0.193577	1.1436	down	0.000942349	0.0230697
3569	IL6	interleukin 6	6.25121	6.3332	6.24223	6.45953	6.50489	6.51982	1.16409	0.2192	1.16409	up	0.000945813	0.0231113
4712	NDUFB6	NADH:ubiquinone oxidoreductase subunit B6	10.8322	10.8208	10.8711	10.7459	10.6939	10.7646	-1.07669	-0.106603	1.07669	down	0.000945399	0.0231113
4841	NONO	non-POU domain containing, octamer-binding	11.2562	11.2965	11.3086	11.2197	11.1176	11.1855	-1.08137	-0.11286	1.08137	down	0.000948531	0.0231633
23420	NOMO1	NODAL modulator 1	10.3409	10.3672	10.3852	10.4303	10.4981	10.494	1.07902	0.10972	1.07902	up	0.000950499	0.023197
283820	NOMO2	NODAL modulator 2	10.3409	10.3672	10.3852	10.4303	10.4981	10.494	1.07902	0.10972	1.07902	up	0.000950499	0.023197
408050	NOMO3	NODAL modulator 3	10.3409	10.3672	10.3852	10.4303	10.4981	10.494	1.07902	0.10972	1.07902	up	0.000950499	0.023197
102723728	LOC102723728	nodal modulator 3-like	10.3409	10.3672	10.3852	10.4303	10.4981	10.494	1.07902	0.10972	1.07902	up	0.000950499	0.023197
6717	SRI	sorcin	8.79659	8.84901	8.84892	8.7238	8.65941	8.70488	-1.09846	-0.135477	1.09846	down	0.000959764	0.0233768
91752	ZNF804A	zinc finger protein 804A	7.90614	7.97522	7.95449	8.12038	8.05833	8.12749	1.1148	0.156783	1.1148	up	0.000963665	0.0234022
127428	TCEANC2	transcription elongation factor A (SII) N-terminal and central domain containing 2	5.78906	5.87681	5.85076	6.08476	6.02585	6.12836	1.18163	0.24078	1.18163	up	0.000962478	0.0234022
55623	THUMPD1	THUMP domain containing 1	9.23677	9.2357	9.26033	9.15562	9.10624	9.10849	-1.08735	-0.120817	1.08735	down	0.000963427	0.0234022
29100	TMEM208	transmembrane protein 208	9.43584	9.47701	9.39726	9.50937	9.66004	9.59814	1.11148	0.15248	1.11148	up	0.000964834	0.0234161
6876	TAGLN	transgelin	12.8957	12.8995	12.856	12.9294	13.0051	12.9942	1.06625	0.0925433	1.06625	up	0.000966498	0.0234421
9747	TCAF1	TRPM8 channel-associated factor 1	7.52012	7.53884	7.60682	7.8424	7.64805	7.80161	1.15569	0.20876	1.15569	up	0.000968287	0.023471
10963	STIP1	stress induced phosphoprotein 1	9.61471	9.64258	9.71393	9.48982	9.4802	9.577	-1.10297	-0.1414	1.10297	down	0.000974409	0.02354
490	ATP2B1	ATPase, Ca++ transporting, plasma membrane 1	9.04081	9.04058	8.97447	8.91326	8.88674	8.85707	-1.09652	-0.13293	1.09652	down	0.000973779	0.02354
60494	CCDC81	coiled-coil domain containing 81	6.67419	6.7268	6.78987	6.94983	6.91047	6.93424	1.14968	0.201227	1.14968	up	0.000973393	0.02354
573	BAG1	BCL2 associated athanogene 1	8.42688	8.43586	8.45348	8.29906	8.30359	8.31191	-1.09725	-0.133887	1.09725	down	0.000975325	0.02354
2192	FBLN1	fibulin 1	8.67873	8.60231	8.6295	8.39739	8.48633	8.53736	-1.11973	-0.163153	1.11973	down	0.000972408	0.02354
55829	VIMP	VCP-interacting membrane selenoprotein	10.217	10.2077	10.277	10.316	10.3473	10.384	1.08316	0.115247	1.08316	up	0.000974867	0.02354
51315	KRCC1	lysine-rich coiled-coil 1	8.15707	8.1608	8.21897	8.34154	8.3316	8.2992	1.10586	0.145167	1.10586	up	0.00098074	0.0236272
7175	TPR	translocated promoter region, nuclear basket protein	6.57905	6.67377	6.68138	6.45418	6.45842	6.3388	-1.17089	-0.2276	1.17089	down	0.000984395	0.0237008
5091	PC	pyruvate carboxylase	6.28137	6.23122	6.28452	6.51645	6.41075	6.69755	1.21073	0.27588	1.21073	up	0.000985938	0.0237089
3454	IFNAR1	interferon (alpha, beta and omega) receptor 1	8.50274	8.64592	8.50158	8.72983	8.68565	8.73482	1.12248	0.166687	1.12248	up	0.000985336	0.0237089
7106	TSPAN4	tetraspanin 4	10.8234	10.7204	10.7332	10.8346	10.9621	10.8966	1.10099	0.138797	1.10099	up	0.00098947	0.0237648
9358	ITGBL1	integrin beta like 1	7.77271	7.73216	7.74183	7.96149	7.93911	7.84905	1.12323	0.16765	1.12323	up	0.000997369	0.0239107
84665	MYPN	myopalladin	6.51139	6.39327	6.6141	7.09876	6.70382	6.7757	1.27737	0.353173	1.27737	up	0.00100636	0.0239798
11278	KLF12	Kruppel-like factor 12	7.14017	7.23828	7.12484	7.29355	7.42848	7.39375	1.15202	0.204163	1.15202	up	0.00100266	0.0239798
1111	CHEK1	checkpoint kinase 1	7.87554	7.84258	7.89796	7.74108	7.71167	7.69679	-1.11382	-0.155513	1.11382	down	0.00100792	0.0239798
65005	MRPL9	mitochondrial ribosomal protein L9	9.52697	9.56917	9.52542	9.42183	9.4362	9.42468	-1.08144	-0.11295	1.08144	down	0.00100349	0.0239798
112398	EGLN2	egl-9 family hypoxia-inducible factor 2	8.84254	8.78136	8.88048	8.6687	8.71517	8.69858	-1.1024	-0.140643	1.1024	down	0.00100404	0.0239798
23405	DICER1	dicer 1, ribonuclease type III	7.00342	7.05277	7.03297	7.19502	7.26483	7.18291	1.13645	0.184533	1.13645	up	0.00100721	0.0239798
54843	SYTL2	synaptotagmin like 2	9.28738	9.19684	9.3499	9.12192	9.09562	9.15623	-1.11223	-0.15345	1.11223	down	0.00100246	0.0239798
100529264	RAB4B-EGLN2	RAB4B-EGLN2 readthrough (NMD candidate)	8.84254	8.78136	8.88048	8.6687	8.71517	8.69858	-1.1024	-0.140643	1.1024	down	0.00100404	0.0239798
9208	LRRFIP1	leucine rich repeat (in FLII) interacting protein 1	8.95028	8.94893	9.04727	9.12115	9.11171	9.12212	1.09898	0.136167	1.09898	up	0.00100804	0.0239798
2737	GLI3	GLI family zinc finger 3	7.42577	7.51582	7.42113	7.21135	7.33414	7.23076	-1.14511	-0.19549	1.14511	down	0.00100817	0.0239798
833	CARS	cysteinyl-tRNA synthetase	9.04147	9.04561	9.11683	9.14786	9.24307	9.24427	1.10478	0.143763	1.10478	up	0.00101152	0.0240303
10927	SPIN1	spindlin 1	11.0499	11.0641	11.0846	10.9768	10.9601	10.988	-1.06527	-0.0912167	1.06527	down	0.00101475	0.0240924
387882	C12orf75	chromosome 12 open reading frame 75	11.7648	11.7698	11.8209	11.8774	11.8541	11.9033	1.06667	0.0931167	1.06667	up	0.00101678	0.0241261
4616	GADD45B	growth arrest and DNA damage inducible beta	9.0002	9.10143	9.11256	9.17897	9.26506	9.21436	1.10808	0.148067	1.10808	up	0.00101958	0.0241635
1861	TOR1A	torsin family 1, member A (torsin A)	4.70949	4.86285	4.86289	4.59461	4.47476	4.34433	-1.2662	-0.34051	1.2662	down	0.00102236	0.0242147
9130	FAM50A	family with sequence similarity 50 member A	10.8529	10.8244	10.8235	10.7021	10.7559	10.7471	-1.07071	-0.0985733	1.07071	down	0.00102388	0.0242361
6049	RNF6	ring finger protein (C3H2C3 type) 6	9.97984	10.0174	10.0099	10.2251	10.0691	10.1354	1.10254	0.14083	1.10254	up	0.00102503	0.0242487
11080	DNAJB4	DnaJ heat shock protein family (Hsp40) member B4	10.0016	10.0421	10.0203	10.1365	10.1053	10.1342	1.07473	0.10398	1.07473	up	0.00102805	0.0242958
5289	PIK3C3	phosphatidylinositol 3-kinase catalytic subunit type 3	9.11165	9.09436	9.11762	9.18073	9.27169	9.26264	1.09466	0.130477	1.09466	up	0.00102895	0.0242978
728294	D2HGDH	D-2-hydroxyglutarate dehydrogenase	8.48607	8.40306	8.45807	8.2309	8.34123	8.30138	-1.11566	-0.157897	1.11566	down	0.00103366	0.0243828
5782	PTPN12	protein tyrosine phosphatase, non-receptor type 12	10.3484	10.3435	10.3618	10.2784	10.1779	10.25	-1.08355	-0.115763	1.08355	down	0.00103379	0.0243828
3013	HIST1H2AD	histone cluster 1, H2ad	6.21057	6.16344	6.34327	6.46029	6.57443	6.43909	1.191	0.252177	1.191	up	0.0010363	0.0244126
8351	HIST1H3D	histone cluster 1, H3d	6.21057	6.16344	6.34327	6.46029	6.57443	6.43909	1.191	0.252177	1.191	up	0.0010363	0.0244126
4176	MCM7	minichromosome maintenance complex component 7	7.16245	7.18044	7.12434	6.93978	6.96957	7.00737	-1.13564	-0.183503	1.13564	down	0.00103743	0.0244247
8935	SKAP2	src kinase associated phosphoprotein 2	7.93665	8.00981	8.03692	7.82025	7.75377	7.87933	-1.13028	-0.176677	1.13028	down	0.00104245	0.0245281
5863	RGL2	ral guanine nucleotide dissociation stimulator-like 2	7.53854	7.54183	7.49889	7.38048	7.3113	7.37688	-1.12521	-0.1702	1.12521	down	0.00104424	0.0245555
11118	BTN3A2	butyrophilin, subfamily 3, member A2	7.47219	7.34358	7.52566	7.10761	7.24128	7.29176	-1.17576	-0.233593	1.17576	down	0.0010466	0.0245964
978	CDA	cytidine deaminase	5.24058	5.28188	5.28357	5.45723	5.55337	5.58104	1.19903	0.26187	1.19903	up	0.0010523	0.0247008
123606	NIPA1	non imprinted in Prader-Willi/Angelman syndrome 1	5.69187	5.84134	5.85677	6.10408	5.96483	6.16228	1.21453	0.280403	1.21453	up	0.00105191	0.0247008
1374	CPT1A	carnitine palmitoyltransferase 1A (liver)	8.82718	8.80053	8.81445	8.56014	8.6837	8.71668	-1.11771	-0.160547	1.11771	down	0.00105415	0.0247246
171558	PTCRA	pre T-cell antigen receptor alpha	7.49081	7.47324	7.5328	7.30607	7.34774	7.33965	-1.12334	-0.167797	1.12334	down	0.00105882	0.0247558
262	AMD1	adenosylmethionine decarboxylase 1	8.26933	8.32498	8.34155	8.20174	8.08185	8.16606	-1.11889	-0.16207	1.11889	down	0.00105792	0.0247558
129285	PPP1R21	protein phosphatase 1 regulatory subunit 21	7.88352	7.85469	7.80245	7.65222	7.68331	7.71739	-1.11929	-0.16258	1.11929	down	0.0010584	0.0247558
221749	PXDC1	PX domain containing 1	8.71782	8.734	8.80213	8.84783	8.89508	8.96915	1.11165	0.152703	1.11165	up	0.00105905	0.0247558
728931	AMD1P3	adenosylmethionine decarboxylase 1 pseudogene 3	8.26933	8.32498	8.34155	8.20174	8.08185	8.16606	-1.11889	-0.16207	1.11889	down	0.00105792	0.0247558
56776	FMN2	formin 2	8.69995	8.77765	8.77765	8.9871	8.8562	8.8847	1.11542	0.157583	1.11542	up	0.00106343	0.0248434
79987	SVEP1	sushi, von Willebrand factor type A, EGF and pentraxin domain containing 1	8.0654	8.09632	8.07409	8.20019	8.22926	8.22622	1.10187	0.139953	1.10187	up	0.00106871	0.0249496
323	APBB2	amyloid beta (A4) precursor protein-binding, family B, member 2	7.9084	7.88249	7.90466	8.07273	8.09565	7.99738	1.11476	0.156737	1.11476	up	0.00106924	0.0249496
23764	MAFF	v-maf avian musculoaponeurotic fibrosarcoma oncogene homolog F	7.45568	7.46799	7.44674	7.65934	7.64182	7.57103	1.12292	0.16726	1.12292	up	0.00107384	0.0250161
8091	HMGA2	high mobility group AT-hook 2	7.2811	7.26766	7.38809	7.44037	7.51309	7.61231	1.1564	0.20964	1.1564	up	0.00107503	0.0250254
388403	YPEL2	yippee like 2	6.8153	6.79673	6.86937	6.99954	7.03819	7.00668	1.13892	0.18767	1.13892	up	0.00107801	0.0250797
10111	RAD50	RAD50 homolog, double strand break repair protein	8.32817	8.39552	8.40728	8.23051	8.2157	8.25121	-1.10536	-0.144517	1.10536	down	0.00107897	0.0250872
5230	PGK1	phosphoglycerate kinase 1	12.0362	12.0422	12.0412	11.9046	11.9733	11.9697	-1.06487	-0.0906733	1.06487	down	0.00108332	0.0251624
256471	MFSD8	major facilitator superfamily domain containing 8	6.98256	6.94013	6.91807	7.15945	7.12854	7.10224	1.13537	0.183157	1.13537	up	0.00108491	0.0251624
2317	FLNB	filamin B, beta	9.2324	9.31891	9.2717	9.38462	9.47401	9.38	1.10079	0.13854	1.10079	up	0.00108522	0.0251624
5279	PIGC	phosphatidylinositol glycan anchor biosynthesis class C	8.12258	8.11661	8.12571	7.94921	7.98009	8.00393	-1.10488	-0.14389	1.10488	down	0.0010854	0.0251624
55256	ADI1	acireductone dioxygenase 1	10.9661	10.9776	10.9781	11.0191	11.1186	11.1223	1.08128	0.112743	1.08128	up	0.00108687	0.0251817
22978	NT5C2	5'-nucleotidase, cytosolic II	8.83709	8.84293	8.92864	8.97252	9.00698	9.11519	1.11884	0.16201	1.11884	up	0.00108885	0.025198
9180	OSMR	oncostatin M receptor	6.21189	6.32842	6.28319	6.4444	6.61973	6.48745	1.1832	0.242693	1.1832	up	0.00109021	0.0252146
175	AGA	aspartylglucosaminidase	8.73138	8.73331	8.68644	8.95956	8.84565	8.8152	1.11452	0.156427	1.11452	up	0.00109093	0.0252164
306	ANXA3	annexin A3	7.26139	7.30908	7.26494	7.55799	7.41493	7.43539	1.14153	0.190967	1.14153	up	0.00109292	0.0252476
2171	FABP5	fatty acid binding protein 5 (psoriasis-associated)	6.88184	6.97464	7.00719	6.75535	6.68038	6.79299	-1.15801	-0.21165	1.15801	down	0.00109753	0.0253391
122953	JDP2	Jun dimerization protein 2	8.05545	8.08033	8.11313	8.18732	8.26901	8.24281	1.10963	0.150077	1.10963	up	0.00110106	0.0253474
23657	SLC7A11	solute carrier family 7 (anionic amino acid transporter light chain, xc- system), member 11	9.50312	9.52034	9.48943	9.62053	9.5899	9.63631	1.08019	0.111283	1.08019	up	0.00109969	0.0253474
55366	LGR4	leucine-rich repeat containing G protein-coupled receptor 4	6.22085	6.19571	6.23876	6.39533	6.45412	6.43628	1.1568	0.210137	1.1568	up	0.00110111	0.0253474
4665	NAB2	NGFI-A binding protein 2 (EGR1 binding protein 2)	8.39444	8.3792	8.45829	8.21052	8.29902	8.26684	-1.11099	-0.15185	1.11099	down	0.00110001	0.0253474
1975	EIF4B	eukaryotic translation initiation factor 4B	10.5338	10.5258	10.5095	10.4612	10.274	10.3856	-1.10912	-0.149417	1.10912	down	0.00110254	0.0253654
23613	ZMYND8	zinc finger, MYND-type containing 8	9.11526	9.1676	9.16317	9.00229	8.98192	9.06687	-1.09555	-0.13165	1.09555	down	0.00111266	0.0255385
64327	LMBR1	limb development membrane protein 1	7.25009	7.34245	7.32661	7.41819	7.52549	7.67331	1.17496	0.232613	1.17496	up	0.00112226	0.025699
378938	MALAT1	metastasis associated lung adenocarcinoma transcript 1 (non-protein coding)	11.2005	11.2111	11.2332	11.1266	11.1109	11.1413	-1.06338	-0.0886633	1.06338	down	0.00112307	0.0257026
654346	LGALS9C	lectin, galactoside-binding, soluble, 9C	5.20856	5.26148	5.19649	5.01785	4.95511	4.82824	-1.22132	-0.288443	1.22132	down	0.00112527	0.0257242
284194	LGALS9B	lectin, galactoside-binding, soluble, 9B	5.20856	5.26148	5.19649	5.01785	4.95511	4.82824	-1.22132	-0.288443	1.22132	down	0.00112527	0.0257242
23231	SEL1L3	sel-1 suppressor of lin-12-like 3 (C. elegans)	9.17301	9.18601	9.28845	9.40539	9.30415	9.38976	1.11004	0.15061	1.11004	up	0.001128	0.0257704
8682	PEA15	phosphoprotein enriched in astrocytes 15	10.8618	10.9013	10.9694	11.0594	10.977	11.0817	1.09319	0.12854	1.09319	up	0.00112912	0.0257811
10493	VAT1	vesicle amine transport 1	9.85837	9.89075	9.85503	9.70692	9.77078	9.78076	-1.08315	-0.11523	1.08315	down	0.00113052	0.025798
55332	DRAM1	DNA damage regulated autophagy modulator 1	8.76097	8.76594	8.82177	8.96807	8.85646	8.97291	1.10925	0.149587	1.10925	up	0.001134	0.0258623
65264	UBE2Z	ubiquitin conjugating enzyme E2Z	10.0138	10.0361	10.0357	10.1318	10.1182	10.1325	1.07102	0.0989867	1.07102	up	0.00113732	0.0259081
8877	SPHK1	sphingosine kinase 1	7.02116	6.90986	6.94593	6.70416	6.7919	6.77394	-1.15054	-0.202317	1.15054	down	0.00114742	0.026043
11014	KDELR2	KDEL (Lys-Asp-Glu-Leu) endoplasmic reticulum protein retention receptor 2	11.4151	11.4368	11.3926	11.4849	11.5072	11.5157	1.06271	0.08775	1.06271	up	0.00114686	0.026043
79630	C1orf54	chromosome 1 open reading frame 54	9.2995	9.3153	9.36148	9.41987	9.44845	9.46264	1.0854	0.118227	1.0854	up	0.00114866	0.026043
2004	ELK3	ELK3, ETS-domain protein (SRF accessory protein 2)	10.3764	10.3913	10.4509	10.3348	10.278	10.2567	-1.08402	-0.116387	1.08402	down	0.00114749	0.026043
6881	TAF10	TATA-box binding protein associated factor 10	10.7608	10.778	10.7737	10.598	10.6874	10.6937	-1.08009	-0.111153	1.08009	down	0.00114986	0.026043
5783	PTPN13	protein tyrosine phosphatase, non-receptor type 13 (APO-1/CD95 (Fas)-associated phosphatase)	7.96554	7.98067	7.98477	8.25217	8.04284	8.22863	1.14675	0.197553	1.14675	up	0.0011495	0.026043
103	ADAR	adenosine deaminase, RNA-specific	11.33	11.2851	11.2903	11.2321	11.196	11.203	-1.06546	-0.09148	1.06546	down	0.00114884	0.026043
4299	AFF1	AF4/FMR2 family member 1	8.98196	9.07737	9.0378	9.24518	9.10098	9.23501	1.11833	0.161347	1.11833	up	0.00115381	0.0261024
5290	PIK3CA	phosphatidylinositol-4,5-bisphosphate 3-kinase catalytic subunit alpha	8.31703	8.22166	8.35193	8.45961	8.53744	8.41111	1.12702	0.172513	1.12702	up	0.00115345	0.0261024
51776	ZAK	sterile alpha motif and leucine zipper containing kinase AZK	5.52448	5.71598	5.45248	5.88552	5.91334	5.78464	1.22846	0.296853	1.22846	up	0.00115494	0.0261129
5579	PRKCB	protein kinase C, beta	4.83914	4.677	4.9403	5.10173	5.19115	5.1092	1.2442	0.315213	1.2442	up	0.00115712	0.0261323
399664	MEX3D	mex-3 RNA binding family member D	9.0057	8.96013	8.99811	8.84486	8.84222	8.89722	-1.09168	-0.126547	1.09168	down	0.00115963	0.0261738
784	CACNB3	calcium channel, voltage-dependent, beta 3 subunit	6.64459	6.65944	6.74479	6.37421	6.54079	6.44876	-1.1715	-0.228353	1.1715	down	0.00116208	0.0262142
80020	FOXRED2	FAD-dependent oxidoreductase domain containing 2	6.49017	6.47378	6.51492	6.18315	6.27607	6.34318	-1.16917	-0.22549	1.16917	down	0.001163	0.0262143
23576	DDAH1	dimethylarginine dimethylaminohydrolase 1	11.0617	11.0472	11.11	11.2702	11.1332	11.1926	1.09105	0.125717	1.09105	up	0.00116342	0.0262143
55711	FAR2	fatty acyl-CoA reductase 2	4.1251	3.92245	4.15728	4.37994	4.45838	4.38235	1.26454	0.338613	1.26454	up	0.00116596	0.0262565
51079	NDUFA13	NADH:ubiquinone oxidoreductase subunit A13	11.1669	11.1783	11.1975	11.2458	11.2761	11.2899	1.06417	0.08973	1.06417	up	0.00116763	0.0262789
272	AMPD3	adenosine monophosphate deaminase 3	7.30668	7.2348	7.32712	7.45934	7.48094	7.44599	1.12705	0.172557	1.12705	up	0.00117091	0.0263227
81790	RNF170	ring finger protein 170	6.26601	6.35773	6.45881	6.6562	6.53041	6.62434	1.18329	0.2428	1.18329	up	0.00117811	0.0264392
5101	PCDH9	protocadherin 9	8.36166	8.35461	8.3328	8.43917	8.51479	8.51606	1.10215	0.140317	1.10215	up	0.00118125	0.0264644
79693	YRDC	yrdC N(6)-threonylcarbamoyltransferase domain containing	8.73443	8.67914	8.70891	8.80654	8.83151	8.88917	1.09803	0.134913	1.09803	up	0.00118212	0.0264689
10611	PDLIM5	PDZ and LIM domain 5	8.05111	8.17305	8.12563	8.23524	8.31423	8.28373	1.11817	0.161137	1.11817	up	0.00119135	0.0266604
168850	ZNF800	zinc finger protein 800	6.07091	6.06819	6.07092	6.24308	6.30873	6.30011	1.15987	0.213967	1.15987	up	0.00119372	0.0266982
29964	PRICKLE4	prickle homolog 4	11.0658	11.0983	11.1062	11.0063	10.9926	11.0038	-1.06377	-0.0891867	1.06377	down	0.00119924	0.0267913
100188893	TOMM6	translocase of outer mitochondrial membrane 6 homolog (yeast)	11.0658	11.0983	11.1062	11.0063	10.9926	11.0038	-1.06377	-0.0891867	1.06377	down	0.00119924	0.0267913
57213	SPRYD7	SPRY domain containing 7	8.46947	8.51685	8.53969	8.667	8.59976	8.68864	1.1043	0.14313	1.1043	up	0.00120675	0.0268978
79815	NIPAL2	NIPA-like domain containing 2	8.33595	8.30663	8.33744	8.45461	8.49082	8.43788	1.09766	0.13443	1.09766	up	0.0012054	0.0268978
60509	AGBL5	ATP/GTP binding protein-like 5	7.87626	7.9348	7.78449	7.63415	7.69707	7.72005	-1.134	-0.181427	1.134	down	0.00120514	0.0268978
81792	ADAMTS12	ADAM metallopeptidase with thrombospondin type 1 motif 12	7.78858	7.79135	7.83368	7.88674	8.04209	8.01936	1.13147	0.178193	1.13147	up	0.00120849	0.0269072
1019	CDK4	cyclin-dependent kinase 4	10.2552	10.2933	10.2808	10.1512	10.1705	10.2013	-1.07334	-0.102113	1.07334	down	0.00121545	0.0270001
88455	ANKRD13A	ankyrin repeat domain 13A	7.60687	7.59708	7.60115	7.71968	7.79859	7.75759	1.1149	0.15692	1.1149	up	0.00121538	0.0270001
2146	EZH2	enhancer of zeste 2 polycomb repressive complex 2 subunit	5.43803	5.43803	5.38796	5.16979	5.07261	5.22173	-1.20299	-0.26663	1.20299	down	0.00121852	0.0270492
5436	POLR2G	polymerase (RNA) II (DNA directed) polypeptide G	10.3632	10.3815	10.4633	10.2539	10.2963	10.3039	-1.08518	-0.117937	1.08518	down	0.00122274	0.0271008
3420	IDH3B	isocitrate dehydrogenase 3 (NAD+) beta	9.86517	9.92796	9.89145	9.77631	9.76871	9.80925	-1.07931	-0.110103	1.07931	down	0.00122788	0.0271688
51176	LEF1	lymphoid enhancer-binding factor 1	4.22067	4.3023	4.48207	4.05679	3.94381	3.96494	-1.27147	-0.3465	1.27147	down	0.00123055	0.0272003
51182	HSPA14	heat shock protein family A (Hsp70) member 14	7.42171	7.32276	7.46455	7.54013	7.6008	7.62965	1.13854	0.187187	1.13854	up	0.00123138	0.0272003
6335	SCN9A	sodium channel, voltage gated, type IX alpha subunit	8.63779	8.66528	8.67043	8.75268	8.80923	8.79374	1.09231	0.127383	1.09231	up	0.00123081	0.0272003
6950	TCP1	t-complex 1	8.98204	8.94045	9.05235	8.81449	8.88414	8.85172	-1.10305	-0.141497	1.10305	down	0.00123328	0.027227
57568	SIPA1L2	signal-induced proliferation-associated 1 like 2	8.2603	8.25357	8.29838	8.07346	8.10292	8.17972	-1.11115	-0.15205	1.11115	down	0.00123605	0.0272575
9079	LDB2	LIM domain binding 2	7.20783	7.38716	7.31241	7.50269	7.45715	7.54938	1.14918	0.200607	1.14918	up	0.00124235	0.0273526
389136	VGLL3	vestigial like family member 3	7.55769	7.46349	7.43011	7.69449	7.60208	7.71739	1.13883	0.187557	1.13883	up	0.00124245	0.0273526
862	RUNX1T1	runt-related transcription factor 1; translocated to, 1 (cyclin D-related)	5.50601	5.43261	5.53148	5.21633	5.28895	5.18498	-1.19743	-0.259947	1.19743	down	0.00124546	0.0273731
160897	GPR180	G protein-coupled receptor 180	8.82342	8.7699	8.79165	8.92675	8.91961	8.90601	1.08859	0.122467	1.08859	up	0.00124526	0.0273731
50628	GEMIN4	gem nuclear organelle associated protein 4	5.60366	5.6618	5.67255	5.25495	5.43783	5.42873	-1.20762	-0.272167	1.20762	down	0.00124675	0.0273861
100289511	LOC100289511	uncharacterized LOC100289511	5.05989	4.8451	4.95125	4.65803	4.71641	4.45824	-1.2668	-0.341187	1.2668	down	0.00124783	0.0273944
26053	AUTS2	autism susceptibility candidate 2	5.40629	5.23683	5.53285	4.80679	5.24608	4.8248	-1.34982	-0.432767	1.34982	down	0.00124904	0.0274058
8463	TEAD2	TEA domain family member 2	6.9263	6.98674	6.99763	6.72424	6.83414	6.76206	-1.14611	-0.196743	1.14611	down	0.00125026	0.0274171
6652	SORD	sorbitol dehydrogenase	8.94308	8.99718	9.00737	8.8209	8.83592	8.89469	-1.09584	-0.13204	1.09584	down	0.00125851	0.0275675
4327	MMP19	matrix metallopeptidase 19	5.1552	5.02515	4.93808	5.3992	5.24247	5.38471	1.23341	0.30265	1.23341	up	0.00125821	0.0275675
9588	PRDX6	peroxiredoxin 6	12.6077	12.6457	12.6316	12.7276	12.6824	12.7123	1.05638	0.07913	1.05638	up	0.00126516	0.0276672
2332	FMR1	fragile X mental retardation 1	7.28572	7.39071	7.34923	7.15945	7.134	7.19435	-1.13232	-0.179287	1.13232	down	0.00127693	0.0278622
4953	ODC1	ornithine decarboxylase 1	9.91465	9.95732	9.91105	9.99459	10.0523	10.134	1.09628	0.132613	1.09628	up	0.00127893	0.0278845
9037	SEMA5A	sema domain, seven thrombospondin repeats (type 1 and type 1-like), transmembrane domain (TM) and short cytoplasmic domain, (semaphorin) 5A	7.57205	7.77964	7.7952	7.8512	7.97502	8.02373	1.17638	0.234353	1.17638	up	0.00128474	0.0279326
10856	RUVBL2	RuvB-like AAA ATPase 2	9.79245	9.78986	9.81158	9.60961	9.70142	9.71389	-1.08899	-0.12299	1.08899	down	0.00128519	0.0279326
57122	NUP107	nucleoporin 107kDa	8.35289	8.24694	8.34355	8.14696	8.14061	8.19455	-1.11246	-0.153753	1.11246	down	0.0012852	0.0279326
5742	PTGS1	prostaglandin-endoperoxide synthase 1 (prostaglandin G/H synthase and cyclooxygenase)	9.11209	9.18264	9.16945	9.24705	9.30353	9.28474	1.08954	0.123713	1.08954	up	0.00128618	0.0279326
30849	PIK3R4	phosphoinositide-3-kinase regulatory subunit 4	7.44075	7.3835	7.41528	7.2478	7.28328	7.18005	-1.12985	-0.176133	1.12985	down	0.00128374	0.0279326
23451	SF3B1	splicing factor 3b, subunit 1, 155kDa	8.15611	8.14187	8.16867	8.01612	8.0323	8.00553	-1.10005	-0.137567	1.10005	down	0.00129369	0.0280413
154807	VKORC1L1	vitamin K epoxide reductase complex subunit 1 like 1	7.78795	7.88404	7.89109	8.01448	7.97525	8.07966	1.1241	0.16877	1.1241	up	0.00130047	0.0281573
51657	STYXL1	serine/threonine/tyrosine interacting-like 1	8.43021	8.46947	8.47692	8.53779	8.63344	8.64187	1.10611	0.1455	1.10611	up	0.00130282	0.0281927
51449	PCYOX1	prenylcysteine oxidase 1	10.6046	10.6439	10.6929	10.7673	10.7334	10.755	1.07534	0.10479	1.07534	up	0.00130549	0.0282349
56261	GPCPD1	glycerophosphocholine phosphodiesterase 1	7.5942	7.54463	7.61725	7.7303	7.73577	7.75809	1.11421	0.156027	1.11421	up	0.00131026	0.028242
55508	SLC35E3	solute carrier family 35 member E3	8.06576	7.978	8.03612	8.14565	8.16659	8.23644	1.1144	0.156267	1.1144	up	0.00130807	0.028242
84159	ARID5B	AT-rich interaction domain 5B	12.3602	12.3852	12.4162	12.3217	12.2057	12.3042	-1.07923	-0.110003	1.07923	down	0.0013106	0.028242
836	CASP3	caspase 3	8.25816	8.27165	8.3022	8.4339	8.38717	8.41401	1.0976	0.134357	1.0976	up	0.00131068	0.028242
55101	ATP5SL	ATP5S-like	7.84352	7.87397	7.89471	7.65189	7.78673	7.64179	-1.13074	-0.177263	1.13074	down	0.00131021	0.028242
54535	CCHCR1	coiled-coil alpha-helical rod protein 1	6.32962	6.27566	6.2857	6.16192	5.95503	6.03984	-1.18487	-0.24473	1.18487	down	0.00131086	0.028242
4179	CD46	CD46 molecule, complement regulatory protein	10.3564	10.3574	10.3258	10.5028	10.3926	10.5241	1.09172	0.126603	1.09172	up	0.0013162	0.0282955
9524	TECR	trans-2,3-enoyl-CoA reductase	9.80306	9.85084	9.87997	9.68338	9.76246	9.72751	-1.08687	-0.120173	1.08687	down	0.00131612	0.0282955
11130	ZWINT	ZW10 interacting kinetochore protein	5.91422	5.88868	6.01856	5.71781	5.71781	5.66527	-1.18115	-0.24019	1.18115	down	0.00131727	0.0283029
27314	RAB30	RAB30, member RAS oncogene family	6.39118	6.36995	6.51903	6.62716	6.75403	6.60506	1.1772	0.235363	1.1772	up	0.00131906	0.028326
9953	HS3ST3B1	heparan sulfate-glucosamine 3-sulfotransferase 3B1	7.91307	7.84706	7.84197	7.63981	7.7751	7.65931	-1.12972	-0.17596	1.12972	down	0.00132061	0.0283284
9955	HS3ST3A1	heparan sulfate-glucosamine 3-sulfotransferase 3A1	7.91307	7.84706	7.84197	7.63981	7.7751	7.65931	-1.12972	-0.17596	1.12972	down	0.00132061	0.0283284
7094	TLN1	talin 1	8.51748	8.55627	8.57433	8.65378	8.6696	8.73712	1.09998	0.137473	1.09998	up	0.00132009	0.0283284
22837	COBLL1	cordon-bleu WH2 repeat protein like 1	7.24587	7.30384	7.17606	7.45873	7.35572	7.58518	1.16847	0.22462	1.16847	up	0.00132229	0.0283335
5641	LGMN	legumain	7.82402	7.77412	7.79778	7.88254	8.01062	8.01379	1.12533	0.170343	1.12533	up	0.00132227	0.0283335
51762	RAB8B	RAB8B, member RAS oncogene family	9.07995	9.12078	9.0983	9.01262	8.97275	8.94864	-1.088	-0.121673	1.088	down	0.00133158	0.0284704
22999	RIMS1	regulating synaptic membrane exocytosis 1	5.66041	5.62221	5.52036	5.98565	5.83052	5.79813	1.20618	0.27044	1.20618	up	0.00133355	0.0284971
6636	SNRPF	small nuclear ribonucleoprotein polypeptide F	9.96308	10.0342	10.0577	9.79631	9.92844	9.90429	-1.10342	-0.141977	1.10342	down	0.00133588	0.0285315
581	BAX	BCL2-associated X protein	10.2251	10.3055	10.2775	10.0947	10.1883	10.163	-1.08726	-0.120703	1.08726	down	0.00133903	0.0285832
55929	DMAP1	DNA methyltransferase 1 associated protein 1	8.24911	8.17693	8.1543	7.99097	8.03719	8.08205	-1.11474	-0.15671	1.11474	down	0.00134679	0.0286821
3357	HTR2B	5-hydroxytryptamine (serotonin) receptor 2B, G protein-coupled	6.30955	6.17576	6.35519	6.4679	6.65347	6.48984	1.19491	0.256903	1.19491	up	0.00135162	0.0287584
8367	HIST1H4E	histone cluster 1, H4e	4.50837	4.37075	4.39936	4.78807	4.71566	4.66757	1.2291	0.297607	1.2291	up	0.00135609	0.0288072
23291	FBXW11	F-box and WD repeat domain containing 11	7.6636	7.77731	7.81991	7.94129	7.89865	7.94588	1.12896	0.175	1.12896	up	0.00135486	0.0288072
9987	HNRNPDL	heterogeneous nuclear ribonucleoprotein D like	9.08821	9.12917	9.14963	8.8891	9.02757	9.00537	-1.10828	-0.148323	1.10828	down	0.00135611	0.0288072
10728	PTGES3	prostaglandin E synthase 3	10.4616	10.4892	10.5364	10.4261	10.2924	10.3787	-1.09429	-0.13	1.09429	down	0.00135756	0.0288115
54677	CROT	carnitine O-octanoyltransferase	8.82404	8.81717	8.81464	8.6837	8.65858	8.73321	-1.09186	-0.126787	1.09186	down	0.00136413	0.0289151
81493	SYNC	syncoilin, intermediate filament protein	9.26382	9.30111	9.32481	9.41248	9.3905	9.43323	1.08334	0.11549	1.08334	up	0.00136523	0.0289226
4043	LRPAP1	LDL receptor related protein associated protein 1	9.581	9.64168	9.6476	9.71789	9.73645	9.75218	1.08079	0.11208	1.08079	up	0.00137133	0.0290353
9728	SECISBP2L	SECIS binding protein 2-like	6.95428	7.11736	7.14932	7.23732	7.28348	7.35995	1.16468	0.21993	1.16468	up	0.00137202	0.0290353
26118	WSB1	WD repeat and SOCS box containing 1	8.46239	8.41539	8.4248	8.5078	8.61324	8.63507	1.11047	0.151177	1.11047	up	0.00137533	0.0290585
55573	CDV3	CDV3 homolog (mouse)	9.76898	9.81552	9.88417	9.91904	9.9501	9.97182	1.08983	0.124097	1.08983	up	0.00137665	0.0290707
2987	GUK1	guanylate kinase 1	10.3297	10.2924	10.328	10.3794	10.4546	10.432	1.07569	0.105257	1.07569	up	0.00137789	0.0290813
80263	TRIM45	tripartite motif containing 45	5.28422	5.33899	5.34369	5.0561	5.07379	5.08294	-1.19033	-0.251357	1.19033	down	0.00138097	0.0291306
53371	NUP54	nucleoporin 54kDa	7.43339	7.37432	7.50578	7.31462	7.20296	7.22391	-1.14129	-0.190667	1.14129	down	0.0013922	0.0293362
291	SLC25A4	solute carrier family 25 (mitochondrial carrier; adenine nucleotide translocator), member 4	7.96384	8.07533	8.07752	8.2189	8.18014	8.18729	1.11462	0.156547	1.11462	up	0.0013947	0.0293731
8347	HIST1H2BC	histone cluster 1, H2bc	7.19277	7.27749	7.30038	7.46811	7.44625	7.39145	1.13162	0.17839	1.13162	up	0.00140168	0.0295043
2132	EXT2	exostosin glycosyltransferase 2	9.43589	9.3655	9.45598	9.49782	9.66002	9.56013	1.11229	0.153533	1.11229	up	0.00140285	0.0295132
3589	IL11	interleukin 11	6.91824	6.89712	6.88028	7.02749	7.09546	7.11786	1.13424	0.181723	1.13424	up	0.00141304	0.029664
57186	RALGAPA2	Ral GTPase activating protein, alpha subunit 2 (catalytic)	6.02283	6.09097	5.94864	5.73059	5.80791	5.80684	-1.1802	-0.239033	1.1802	down	0.00141256	0.029664
129446	XIRP2	xin actin binding repeat containing 2	3.93843	3.96354	4.09763	4.27601	4.27204	4.4427	1.25735	0.330383	1.25735	up	0.00141302	0.029664
57819	LSM2	LSM2 homolog, U6 small nuclear RNA and mRNA degradation associated	8.83381	8.80184	8.85889	8.61014	8.70638	8.73903	-1.10675	-0.14633	1.10675	down	0.0014148	0.0296828
64417	C5orf28	chromosome 5 open reading frame 28	7.94296	7.79591	7.92142	8.06249	8.01203	8.12735	1.1333	0.180527	1.1333	up	0.0014252	0.0298397
22981	NINL	ninein like	7.21845	7.2335	7.27401	7.02879	7.0906	7.08672	-1.12762	-0.173283	1.12762	down	0.00142437	0.0298397
6387	CXCL12	chemokine (C-X-C motif) ligand 12	9.03854	9.07616	9.12275	8.93793	8.92233	8.98828	-1.09402	-0.129637	1.09402	down	0.0014269	0.0298594
492311	IGIP	IgA-inducing protein	7.79477	7.82245	7.84991	7.94514	7.978	7.97954	1.10587	0.145183	1.10587	up	0.0014305	0.0299188
7536	SF1	splicing factor 1	8.6429	8.65844	8.67192	8.75747	8.8284	8.77031	1.09251	0.12764	1.09251	up	0.00143433	0.0299316
133	ADM	adrenomedullin	11.2592	11.322	11.346	11.4797	11.3591	11.4566	1.0888	0.122743	1.0888	up	0.00143528	0.0299316
100505585	LOC100505585	uncharacterized LOC100505585	8.42332	8.40807	8.48317	8.29629	8.33177	8.26337	-1.1027	-0.141043	1.1027	down	0.00143711	0.0299457
9138	ARHGEF1	Rho guanine nucleotide exchange factor 1	8.42332	8.40807	8.48317	8.29629	8.33177	8.26337	-1.1027	-0.141043	1.1027	down	0.00143711	0.0299457
51661	FKBP7	FK506 binding protein 7	9.2313	9.30034	9.33418	9.40058	9.39437	9.46515	1.09538	0.131427	1.09538	up	0.00143875	0.029964
23028	KDM1A	lysine (K)-specific demethylase 1A	9.69349	9.74196	9.75357	9.57302	9.6463	9.62116	-1.08386	-0.11618	1.08386	down	0.00144054	0.0299854
30827	CXXC1	CXXC finger protein 1	6.58684	6.75304	6.69604	6.43456	6.52459	6.39304	-1.17114	-0.22791	1.17114	down	0.00144482	0.0300161
4928	NUP98	nucleoporin 98kDa	7.84966	7.86698	7.93345	8.04749	8.01067	8.03894	1.1088	0.149003	1.1088	up	0.00144507	0.0300161
143458	LDLRAD3	low density lipoprotein receptor class A domain containing 3	8.22572	8.30119	8.33658	8.06686	8.16411	8.15292	-1.11718	-0.159867	1.11718	down	0.00145749	0.0302422
1129	CHRM2	cholinergic receptor, muscarinic 2	7.29667	7.25312	7.32532	7.47897	7.4346	7.45437	1.1206	0.164277	1.1206	up	0.00145919	0.0302454
84295	PHF6	PHD finger protein 6	6.15584	6.23949	6.27572	6.00804	6.00315	6.00137	-1.16433	-0.219497	1.16433	down	0.0014625	0.0302821
2799	GNS	glucosamine (N-acetyl)-6-sulfatase	8.19052	8.21035	8.147	7.90004	8.07779	8.03697	-1.13107	-0.17769	1.13107	down	0.00146343	0.0302855
7264	TSTA3	tissue specific transplantation antigen P35B	7.87311	7.93325	7.88547	8.01472	8.02989	8.1116	1.11326	0.154793	1.11326	up	0.0014676	0.0303559
54874	FNBP1L	formin binding protein 1-like	6.85957	6.97422	7.01206	6.64085	6.77863	6.76719	-1.16451	-0.219727	1.16451	down	0.00147642	0.0305223
26011	TENM4	teneurin transmembrane protein 4	6.72735	6.70282	6.85292	6.4629	6.62525	6.50305	-1.17335	-0.23063	1.17335	down	0.00147859	0.0305235
10763	NES	nestin	9.06912	9.06085	9.15644	9.22337	9.19456	9.26808	1.09672	0.1332	1.09672	up	0.00147881	0.0305235
3400	ID4	inhibitor of DNA binding 4, dominant negative helix-loop-helix protein	5.13008	5.32683	5.36736	4.95641	4.94544	5.03381	-1.22791	-0.296203	1.22791	down	0.00148496	0.0306047
100526836	BLOC1S5-TXNDC5	BLOC1S5-TXNDC5 readthrough (NMD candidate)	11.7493	11.7953	11.8488	11.9166	11.859	11.9428	1.07799	0.10834	1.07799	up	0.00148428	0.0306047
112464	PRKCDBP	protein kinase C, delta binding protein	10.9056	10.9516	10.9193	10.7819	10.8536	10.8414	-1.07169	-0.0998933	1.07169	down	0.00148507	0.0306047
81567	TXNDC5	thioredoxin domain containing 5 (endoplasmic reticulum)	11.7493	11.7953	11.8488	11.9166	11.859	11.9428	1.07799	0.10834	1.07799	up	0.00148428	0.0306047
10921	RNPS1	RNA binding protein S1, serine-rich domain	10.9787	10.9791	10.9875	10.8798	10.8612	10.926	-1.06641	-0.09276	1.06641	down	0.00149177	0.0307266
5571	PRKAG1	protein kinase, AMP-activated, gamma 1 non-catalytic subunit	10.4375	10.4639	10.4436	10.298	10.3403	10.3887	-1.07626	-0.106023	1.07626	down	0.00149368	0.0307303
51118	UTP11L	UTP11-like, U3 small nucleolar ribonucleoprotein (yeast)	9.58037	9.64168	9.64079	9.52659	9.46904	9.51923	-1.08372	-0.115993	1.08372	down	0.00149586	0.0307303
4771	NF2	neurofibromin 2 (merlin)	7.54837	7.55985	7.544	7.6564	7.87644	7.71739	1.14817	0.199337	1.14817	up	0.00149445	0.0307303
203068	TUBB	tubulin, beta class I	11.9717	11.9965	12.0429	11.9042	11.9207	11.9259	-1.06197	-0.08674	1.06197	down	0.00149436	0.0307303
6789	STK4	serine/threonine kinase 4	8.83725	8.86714	8.84234	8.77022	8.68643	8.70333	-1.09347	-0.128917	1.09347	down	0.00149584	0.0307303
10914	PAPOLA	poly(A) polymerase alpha	8.53047	8.43957	8.40903	8.35531	8.26971	8.28689	-1.11398	-0.15572	1.11398	down	0.00149716	0.0307411
84886	C1orf198	chromosome 1 open reading frame 198	9.44383	9.41158	9.45692	9.51453	9.55511	9.58716	1.08284	0.114823	1.08284	up	0.00150001	0.0307834
353091	RAET1G	retinoic acid early transcript 1G	7.69617	7.70319	7.63849	7.81037	7.82219	7.86263	1.11145	0.152447	1.11145	up	0.00150538	0.0308295
80328	ULBP2	UL16 binding protein 2	7.69617	7.70319	7.63849	7.81037	7.82219	7.86263	1.11145	0.152447	1.11145	up	0.00150538	0.0308295
56851	EMC7	ER membrane protein complex subunit 7	10.8257	10.8381	10.8289	10.9044	10.9225	10.9221	1.061	0.0854267	1.061	up	0.00150539	0.0308295
10212	DDX39A	DEAD (Asp-Glu-Ala-Asp) box polypeptide 39A	8.06367	8.08396	8.09794	7.79437	7.90215	7.99897	-1.13553	-0.18336	1.13553	down	0.0015048	0.0308295
154064	RAET1L	retinoic acid early transcript 1L	7.69617	7.70319	7.63849	7.81037	7.82219	7.86263	1.11145	0.152447	1.11145	up	0.00150538	0.0308295
56180	MOSPD1	motile sperm domain containing 1	9.72644	9.75815	9.74412	9.83203	9.83318	9.87517	1.07467	0.10389	1.07467	up	0.00150644	0.030835
89796	NAV1	neuron navigator 1	9.19843	9.2462	9.36258	9.10373	9.06593	9.16271	-1.11596	-0.15828	1.11596	down	0.00150764	0.0308434
6664	SOX11	SRY-box 11	6.53349	6.65068	6.74902	6.39518	6.37473	6.46106	-1.17615	-0.234073	1.17615	down	0.0015103	0.0308819
2550	GABBR1	gamma-aminobutyric acid (GABA) B receptor, 1	6.28234	6.34679	6.28295	6.04623	6.17333	5.97038	-1.18158	-0.240713	1.18158	down	0.00151261	0.0309129
4908	NTF3	neurotrophin 3	8.32857	8.34395	8.33018	8.46962	8.43119	8.49371	1.09475	0.130607	1.09475	up	0.00151737	0.0309941
1948	EFNB2	ephrin-B2	6.16281	6.28832	6.27511	6.50743	6.52489	6.38507	1.17315	0.230383	1.17315	up	0.00151851	0.0310014
3084	NRG1	neuregulin 1	6.05178	6.03815	6.03591	6.28463	6.17489	6.3719	1.17706	0.235193	1.17706	up	0.00152699	0.0311584
55351	STK32B	serine/threonine kinase 32B	7.56971	7.56945	7.55417	7.71388	7.71	7.70967	1.10707	0.14674	1.10707	up	0.00152833	0.0311695
3646	EIF3E	eukaryotic translation initiation factor 3 subunit E	11.6584	11.7079	11.6962	11.6072	11.5808	11.618	-1.06105	-0.0854867	1.06105	down	0.00153282	0.0312316
51101	ZC2HC1A	zinc finger, C2HC-type containing 1A	8.1861	8.16175	8.1546	7.93976	8.03783	8.06173	-1.11294	-0.154377	1.11294	down	0.00153376	0.0312316
81285	OR51E2	olfactory receptor, family 51, subfamily E, member 2	5.66956	5.48115	5.56865	5.77136	5.8189	5.93351	1.20425	0.268137	1.20425	up	0.0015335	0.0312316
7538	ZFP36	ZFP36 ring finger protein	10.1226	10.1348	10.1606	10.0745	9.98433	10.0289	-1.07929	-0.110087	1.07929	down	0.0015385	0.0312958
1211	CLTA	clathrin, light chain A	11.5183	11.4983	11.4908	11.3991	11.398	11.449	-1.06222	-0.0870867	1.06222	down	0.00153821	0.0312958
2683	B4GALT1	UDP-Gal:betaGlcNAc beta 1,4- galactosyltransferase, polypeptide 1	8.09031	8.04094	7.99961	8.17305	8.19084	8.19638	1.1043	0.143137	1.1043	up	0.00153991	0.0313084
9019	MPZL1	myelin protein zero-like 1	9.37743	9.43425	9.43905	9.49344	9.55504	9.55729	1.08549	0.118347	1.08549	up	0.00154851	0.0314182
57380	MRS2	MRS2, magnesium transporter	6.34271	6.37852	6.44944	6.57682	6.61967	6.58014	1.15028	0.201987	1.15028	up	0.00154771	0.0314182
1856	DVL2	dishevelled segment polarity protein 2	8.08511	8.08902	8.08522	7.97129	7.84096	7.96567	-1.11766	-0.160477	1.11766	down	0.00155493	0.0314998
163049	ZNF791	zinc finger protein 791	7.48069	7.55606	7.62447	7.71657	7.71748	7.73536	1.12459	0.169397	1.12459	up	0.00155585	0.0315022
2588	GALNS	galactosamine (N-acetyl)-6-sulfatase	9.71193	9.70152	9.76839	9.59352	9.62654	9.62984	-1.07971	-0.110647	1.07971	down	0.00155895	0.0315487
23450	SF3B3	splicing factor 3b subunit 3	7.19432	7.2617	7.18785	6.95483	7.02542	7.09403	-1.14066	-0.189863	1.14066	down	0.00155979	0.0315495
26002	MOXD1	monooxygenase, DBH-like 1	7.9037	7.89958	7.8913	8.07514	7.98715	8.07979	1.10893	0.149167	1.10893	up	0.00156337	0.0315894
54557	SGTB	small glutamine-rich tetratricopeptide repeat (TPR)-containing, beta	9.03843	8.99659	9.0913	9.18098	9.15726	9.15884	1.08944	0.123587	1.08944	up	0.00156837	0.0316677
683	BST1	bone marrow stromal cell antigen 1	7.81419	7.87436	7.94053	8.17574	7.98745	8.04296	1.14263	0.192357	1.14263	up	0.00156886	0.0316677
5732	PTGER2	prostaglandin E receptor 2	8.32304	8.33791	8.33977	8.21654	8.19046	8.20721	-1.09341	-0.128837	1.09341	down	0.00157322	0.031707
861	RUNX1	runt-related transcription factor 1	9.0455	9.12384	9.12252	8.98069	8.94536	8.98969	-1.09079	-0.125373	1.09079	down	0.0015804	0.0318355
100506403	LOC100506403	uncharacterized LOC100506403	9.0455	9.12384	9.12252	8.98069	8.94536	8.98969	-1.09079	-0.125373	1.09079	down	0.0015804	0.0318355
3068	HDGF	hepatoma-derived growth factor	9.89673	9.92852	9.96501	9.80794	9.83679	9.82856	-1.07598	-0.105657	1.07598	down	0.00158202	0.0318516
3133	HLA-E	major histocompatibility complex, class I, E	10.1823	10.1799	10.0956	10.2371	10.2691	10.2907	1.08148	0.11301	1.08148	up	0.00158522	0.0318835
10667	FARS2	phenylalanyl-tRNA synthetase 2, mitochondrial	6.7274	6.69153	6.76798	6.5333	6.54785	6.54037	-1.13955	-0.188463	1.13955	down	0.00159208	0.0319888
6385	SDC4	syndecan 4	11.0874	11.1008	11.1756	11.2361	11.1945	11.241	1.07371	0.1026	1.07371	up	0.00159517	0.0320345
10524	KAT5	K(lysine) acetyltransferase 5	8.65797	8.71186	8.6407	8.46449	8.57758	8.53705	-1.10481	-0.143803	1.10481	down	0.0015995	0.032105
1836	SLC26A2	solute carrier family 26 (anion exchanger), member 2	8.68683	8.63297	8.57818	8.52504	8.4953	8.44643	-1.10476	-0.143737	1.10476	down	0.00161098	0.0323026
1407	CRY1	cryptochrome circadian clock 1	7.74899	7.74878	7.84949	8.00445	7.89961	7.94179	1.1221	0.166197	1.1221	up	0.00161496	0.0323659
2898	GRIK2	glutamate receptor, ionotropic, kainate 2	7.41358	7.32651	7.38623	7.56398	7.48491	7.60066	1.1285	0.17441	1.1285	up	0.00161698	0.0323898
65059	RAPH1	Ras association (RalGDS/AF-6) and pleckstrin homology domains 1	9.8713	9.88514	9.88392	9.95742	9.96998	10.032	1.07651	0.10636	1.07651	up	0.00161903	0.032398
128989	TANGO2	transport and golgi organization 2 homolog	8.93568	9.00415	8.94873	9.04254	9.13346	9.10217	1.0942	0.12987	1.0942	up	0.00162672	0.0325352
137075	CLDN23	claudin 23	5.59723	5.43775	5.34243	4.9943	5.22049	5.20565	-1.24746	-0.31899	1.24746	down	0.00162758	0.0325358
5141	PDE4A	phosphodiesterase 4A	8.47354	8.50809	8.61029	8.37009	8.4078	8.36153	-1.11021	-0.150833	1.11021	down	0.00163368	0.0326246
4905	NSF	N-ethylmaleimide-sensitive factor	10.7891	10.7809	10.8133	10.8597	10.8859	10.9111	1.0652	0.09113	1.0652	up	0.00163561	0.0326466
5836	PYGL	phosphorylase, glycogen, liver	8.97532	8.99733	9.01856	8.91467	8.8663	8.84379	-1.08836	-0.12215	1.08836	down	0.00163955	0.0326632
286451	YIPF6	Yip1 domain family member 6	9.26579	9.33414	9.30868	9.40297	9.4133	9.43015	1.08118	0.112603	1.08118	up	0.00164054	0.0326632
4644	MYO5A	myosin VA	8.41705	8.39571	8.47557	8.5909	8.50971	8.67684	1.11964	0.16304	1.11964	up	0.00164158	0.0326664
57472	CNOT6	CCR4-NOT transcription complex subunit 6	7.67769	7.74193	7.72403	7.53285	7.57505	7.57695	-1.11183	-0.152933	1.11183	down	0.0016425	0.0326682
1656	DDX6	DEAD (Asp-Glu-Ala-Asp) box helicase 6	6.83898	6.87072	6.92655	7.00885	7.11008	7.07703	1.13805	0.18657	1.13805	up	0.00164606	0.0327058
27086	FOXP1	forkhead box P1	5.64253	5.6078	5.53219	5.83606	5.93532	5.76455	1.19014	0.251137	1.19014	up	0.00164555	0.0327058
128	ADH5	alcohol dehydrogenase 5 (class III), chi polypeptide	10.9479	10.9644	10.955	10.8823	10.8326	10.8826	-1.06432	-0.0899267	1.06432	down	0.00165627	0.0328208
642443	ADH5P4	alcohol dehydrogenase 5 (class III), chi polypeptide, pseudogene 4	10.9479	10.9644	10.955	10.8823	10.8326	10.8826	-1.06432	-0.0899267	1.06432	down	0.00165627	0.0328208
28951	TRIB2	tribbles pseudokinase 2	8.64818	8.72084	8.63255	8.36556	8.56717	8.52535	-1.1338	-0.181163	1.1338	down	0.00165685	0.0328208
84681	HINT2	histidine triad nucleotide binding protein 2	9.15437	9.14347	9.13901	9.04182	8.99003	9.05601	-1.08397	-0.11633	1.08397	down	0.00165604	0.0328208
25937	WWTR1	WW domain containing transcription regulator 1	10.0882	10.0898	10.0441	9.96512	9.93384	10.0036	-1.07662	-0.106507	1.07662	down	0.00165668	0.0328208
84056	KATNAL1	katanin p60 subunit A-like 1	9.19673	9.19284	9.2126	9.33452	9.30531	9.29048	1.07876	0.10938	1.07876	up	0.00165908	0.0328242
6749	SSRP1	structure specific recognition protein 1	9.18867	9.17384	9.22336	9.05883	9.08172	9.10191	-1.08258	-0.11447	1.08258	down	0.00165946	0.0328242
57520	HECW2	HECT, C2 and WW domain containing E3 ubiquitin protein ligase 2	7.8735	7.98875	8.00275	8.08643	8.10408	8.16818	1.12083	0.164563	1.12083	up	0.00165952	0.0328242
493869	GPX8	glutathione peroxidase 8 (putative)	10.2578	10.2545	10.2629	10.3826	10.3111	10.3931	1.07467	0.1039	1.07467	up	0.00166048	0.0328265
84881	RPUSD4	RNA pseudouridylate synthase domain containing 4	7.27042	7.23322	7.32035	7.09647	7.11157	7.11055	-1.12386	-0.168467	1.12386	down	0.00166354	0.0328376
131566	DCBLD2	discoidin, CUB and LCCL domain containing 2	10.562	10.5853	10.6343	10.7092	10.6688	10.701	1.07112	0.0991267	1.07112	up	0.00166582	0.0328661
6692	SPINT1	serine peptidase inhibitor, Kunitz type 1	6.71137	6.53044	6.58664	6.45925	6.27421	6.36834	-1.18281	-0.242217	1.18281	down	0.00167735	0.0328861
359948	IRF2BP2	interferon regulatory factor 2 binding protein 2	10.1223	10.1512	10.1566	10.0721	9.98011	10.0475	-1.07931	-0.110113	1.07931	down	0.00167278	0.0328861
162394	SLFN5	schlafen family member 5	7.28581	7.24616	7.29271	7.06101	7.17247	7.04483	-1.13455	-0.182123	1.13455	down	0.00167656	0.0328861
114798	SLITRK1	SLIT and NTRK like family member 1	5.60366	5.68561	5.73059	5.92545	5.95474	5.85251	1.17904	0.237613	1.17904	up	0.00167836	0.0328861
161742	SPRED1	sprouty-related, EVH1 domain containing 1	8.54078	8.66064	8.58809	8.78639	8.70017	8.73995	1.10624	0.145667	1.10624	up	0.00167613	0.0328861
4660	PPP1R12B	protein phosphatase 1 regulatory subunit 12B	6.55577	6.63893	6.63966	6.79391	6.78302	6.82487	1.14009	0.189147	1.14009	up	0.00167426	0.0328861
3875	KRT18	keratin 18, type I	7.88167	7.93191	7.90719	8.00758	8.05346	8.10841	1.10923	0.14956	1.10923	up	0.00167228	0.0328861
55092	TMEM51	transmembrane protein 51	8.32969	8.35641	8.42275	8.14787	8.22343	8.27048	-1.11395	-0.15569	1.11395	down	0.00167162	0.0328861
837	CASP4	caspase 4	7.73503	7.88874	7.89189	7.71156	7.55566	7.65251	-1.14762	-0.198643	1.14762	down	0.00168387	0.0329579
282679	AQP11	aquaporin 11	5.20685	5.17312	5.12829	5.42098	5.34779	5.53294	1.20121	0.264483	1.20121	up	0.00171087	0.0333428
7465	WEE1	WEE1 G2 checkpoint kinase	8.82748	8.83481	8.88208	8.97737	8.95015	8.97095	1.08525	0.118033	1.08525	up	0.00171117	0.0333428
9204	ZMYM6	zinc finger, MYM-type 6	7.28882	7.27147	7.35795	7.46828	7.46148	7.47402	1.11872	0.161847	1.11872	up	0.00171102	0.0333428
84962	AJUBA	ajuba LIM protein	8.66709	8.64091	8.68945	8.79403	8.76432	8.80244	1.08757	0.121113	1.08757	up	0.0017079	0.0333428
7167	TPI1	triosephosphate isomerase 1	12.3825	12.3707	12.3826	12.2896	12.3027	12.3238	-1.05208	-0.07324	1.05208	down	0.00170814	0.0333428
7026	NR2F2	nuclear receptor subfamily 2 group F member 2	10.4771	10.4611	10.4959	10.4217	10.2986	10.3675	-1.08331	-0.115443	1.08331	down	0.0017169	0.0334213
586	BCAT1	branched chain amino-acid transaminase 1, cytosolic	11.3442	11.3923	11.3894	11.5139	11.4215	11.4931	1.07243	0.10088	1.07243	up	0.00171645	0.0334213
10957	PNRC1	proline rich nuclear receptor coactivator 1	10.3614	10.3742	10.456	10.3066	10.2358	10.2997	-1.08408	-0.11647	1.08408	down	0.0017199	0.0334633
1643	DDB2	damage-specific DNA binding protein 2	9.05622	8.97627	9.01171	8.82328	8.9427	8.85871	-1.10178	-0.139837	1.10178	down	0.00172967	0.0336035
64648	SPANXD	SPANX family member D	4.10441	4.07343	4.17164	4.34116	4.57876	4.39097	1.24874	0.32047	1.24874	up	0.0017348	0.0336864
64663	SPANXC	SPANX family member C	4.10441	4.07343	4.17164	4.34116	4.57876	4.39097	1.24874	0.32047	1.24874	up	0.0017348	0.0336864
2760	GM2A	GM2 ganglioside activator	7.05372	7.05648	7.09342	7.25857	7.17386	7.32845	1.13741	0.185753	1.13741	up	0.00174109	0.0337918
3020	H3F3A	H3 histone, family 3A	11.7022	11.717	11.686	11.5904	11.6252	11.6408	-1.05915	-0.0829067	1.05915	down	0.00174476	0.0338464
440926	H3F3AP4	H3 histone, family 3A, pseudogene 4	11.7022	11.717	11.686	11.5904	11.6252	11.6408	-1.05915	-0.0829067	1.05915	down	0.00174476	0.0338464
100526664	LY75-CD302	LY75-CD302 readthrough	7.35637	7.4337	7.42585	7.23262	7.28061	7.19206	-1.12522	-0.17021	1.12522	down	0.00175298	0.0339728
9936	CD302	CD302 molecule	7.35637	7.4337	7.42585	7.23262	7.28061	7.19206	-1.12522	-0.17021	1.12522	down	0.00175298	0.0339728
290	ANPEP	alanyl (membrane) aminopeptidase	7.60754	7.77561	7.71274	7.52749	7.52196	7.52079	-1.12913	-0.175217	1.12913	down	0.00175387	0.0339729
51119	SBDS	Shwachman-Bodian-Diamond syndrome	11.3246	11.3045	11.3338	11.4143	11.3768	11.4278	1.06095	0.0853567	1.06095	up	0.0017571	0.0340187
155370	SBDSP1	Shwachman-Bodian-Diamond syndrome pseudogene 1	11.3246	11.3045	11.3338	11.4143	11.3768	11.4278	1.06095	0.0853567	1.06095	up	0.0017571	0.0340187
126731	CCSAP	centriole, cilia and spindle-associated protein	7.02226	7.02226	6.9483	7.1807	7.18891	7.14176	1.12728	0.17285	1.12728	up	0.00175901	0.0340389
821	CANX	calnexin	11.0819	11.063	11.1355	11.0345	10.948	10.9832	-1.07538	-0.10485	1.07538	down	0.00176728	0.0341152
84153	RNASEH2C	ribonuclease H2 subunit C	8.51373	8.56465	8.48055	8.60751	8.73772	8.65973	1.10855	0.148677	1.10855	up	0.00176718	0.0341152
3836	KPNA1	karyopherin alpha 1	8.24315	8.19759	8.22039	8.33754	8.34921	8.35997	1.09318	0.12853	1.09318	up	0.00177131	0.0341427
81889	FAHD1	fumarylacetoacetate hydrolase domain containing 1	9.80425	9.83179	9.87543	9.70181	9.73577	9.74859	-1.07806	-0.108433	1.07806	down	0.00177073	0.0341427
7837	PXDN	peroxidasin	11.9477	11.9948	11.9818	12.0306	12.078	12.0627	1.05873	0.08233	1.05873	up	0.00177631	0.0342055
2521	FUS	FUS RNA binding protein	11.3713	11.4014	11.4416	11.2857	11.292	11.3478	-1.06904	-0.09631	1.06904	down	0.00178489	0.0343193
10124	ARL4A	ADP ribosylation factor like GTPase 4A	5.71682	5.84392	5.60983	5.94468	6.11922	5.94154	1.21276	0.27829	1.21276	up	0.00178571	0.0343193
23328	SASH1	SAM and SH3 domain containing 1	10.3541	10.3403	10.3995	10.2429	10.2313	10.3027	-1.07597	-0.105643	1.07597	down	0.00178505	0.0343193
79633	FAT4	FAT atypical cadherin 4	8.06571	8.08673	8.18909	8.27482	8.22802	8.30339	1.11334	0.1549	1.11334	up	0.0018008	0.0345081
4651	MYO10	myosin X	8.01244	8.13394	8.19966	8.34796	8.25052	8.28076	1.13111	0.177733	1.13111	up	0.00179984	0.0345081
151963	MB21D2	Mab-21 domain containing 2	7.58993	7.56715	7.60249	7.6627	7.82449	7.79875	1.12932	0.175457	1.12932	up	0.00180284	0.034523
3012	HIST1H2AE	histone cluster 1, H2ae	7.49074	7.44405	7.38954	7.17388	7.23968	7.33978	-1.14102	-0.19033	1.14102	down	0.00180541	0.034546
23471	TRAM1	translocation associated membrane protein 1	10.7664	10.8013	10.851	11.0166	10.869	10.9211	1.09381	0.129357	1.09381	up	0.00180896	0.0345971
10904	BLCAP	bladder cancer associated protein	10.4302	10.4695	10.4674	10.5372	10.535	10.5779	1.06754	0.0942867	1.06754	up	0.00181262	0.0346335
1615	DARS	aspartyl-tRNA synthetase	8.79004	8.76225	8.80707	8.69005	8.53448	8.67346	-1.11249	-0.15379	1.11249	down	0.00182244	0.0347536
10395	DLC1	DLC1 Rho GTPase activating protein	9.91849	9.92489	9.94684	10.0132	10.0335	10.0293	1.06826	0.0952633	1.06826	up	0.00182977	0.034827
57830	KRTAP5-8	keratin associated protein 5-8	5.18568	5.18278	5.00615	4.74348	4.92197	4.82796	-1.22581	-0.293733	1.22581	down	0.00182888	0.034827
116068	LYSMD3	LysM, putative peptidoglycan-binding, domain containing 3	7.5454	7.49469	7.59289	7.77126	7.63174	7.76859	1.13252	0.179537	1.13252	up	0.00182983	0.034827
1718	DHCR24	24-dehydrocholesterol reductase	9.25149	9.22648	9.25377	9.31128	9.39426	9.37458	1.08382	0.116127	1.08382	up	0.00183773	0.0349604
337976	KRTAP20-2	keratin associated protein 20-2	4.64922	4.67275	4.55015	5.0135	4.8383	4.88193	1.22027	0.287203	1.22027	up	0.00184143	0.035014
9693	RAPGEF2	Rap guanine nucleotide exchange factor 2	5.41564	5.41673	5.09076	5.57105	5.6672	5.64459	1.24825	0.319903	1.24825	up	0.0018435	0.0350364
9581	PREPL	prolyl endopeptidase-like	8.06401	7.99983	8.06129	8.19263	8.16873	8.17302	1.09917	0.136417	1.09917	up	0.00184448	0.035038
9805	SCRN1	secernin 1	11.1458	11.1434	11.1293	11.1914	11.2628	11.2334	1.06415	0.0897067	1.06415	up	0.00184888	0.0350877
2710	GK	glycerol kinase	7.24395	7.25406	7.28243	7.58167	7.31718	7.58469	1.17639	0.234367	1.17639	up	0.00185461	0.0351455
10556	RPP30	ribonuclease P/MRP 30kDa subunit	5.82353	5.82197	5.86078	5.53172	5.63691	5.64641	-1.17317	-0.230413	1.17317	down	0.00185713	0.0351764
142940	TRUB1	TruB pseudouridine (psi) synthase family member 1	5.43657	5.3036	5.38472	5.59968	5.58515	5.67438	1.18491	0.244773	1.18491	up	0.0018854	0.0356432
6470	SHMT1	serine hydroxymethyltransferase 1 (soluble)	4.6893	4.87636	4.81156	4.44254	4.39619	4.60724	-1.24007	-0.310417	1.24007	down	0.00189123	0.0357191
10782	ZNF274	zinc finger protein 274	7.88875	7.86274	7.90185	8.03495	8.01161	8.01379	1.0986	0.13567	1.0986	up	0.00189049	0.0357191
55973	BCAP29	B-cell receptor-associated protein 29	9.28156	9.28948	9.33534	9.42896	9.37169	9.46912	1.08759	0.12113	1.08759	up	0.00189256	0.0357271
8131	NPRL3	NPR3-like, GATOR1 complex subunit	6.82958	6.94452	6.86416	6.5899	6.77285	6.62347	-1.16259	-0.217347	1.16259	down	0.00189561	0.0357503
253512	SLC25A30	solute carrier family 25, member 30	7.80601	7.80493	7.91259	8.07969	7.97678	7.96905	1.12298	0.16733	1.12298	up	0.00189536	0.0357503
8301	PICALM	phosphatidylinositol binding clathrin assembly protein	9.69823	9.70441	9.70669	9.79503	9.82675	9.78461	1.07105	0.09902	1.07105	up	0.00190206	0.0358547
79066	METTL16	methyltransferase like 16	7.20329	7.2513	7.24707	7.08627	7.05558	7.07193	-1.11932	-0.162627	1.11932	down	0.00190494	0.0358919
1951	CELSR3	cadherin, EGF LAG seven-pass G-type receptor 3	7.13621	7.23091	7.17096	6.97619	7.06744	6.9279	-1.13985	-0.18885	1.13985	down	0.00191031	0.0359253
27125	AFF4	AF4/FMR2 family member 4	6.30945	6.33818	6.4049	6.53474	6.52029	6.597	1.14857	0.199833	1.14857	up	0.00191346	0.0359664
7318	UBA7	ubiquitin-like modifier activating enzyme 7	7.03983	7.00308	6.97716	6.80698	6.81058	6.87315	-1.1301	-0.176453	1.1301	down	0.00191868	0.0360471
11259	FILIP1L	filamin A interacting protein 1-like	9.41287	9.48974	9.50492	9.55577	9.62832	9.58755	1.08777	0.12137	1.08777	up	0.00193122	0.0362164
79625	NDNF	neuron-derived neurotrophic factor	4.13146	4.29678	4.17981	4.55132	4.42899	4.52271	1.22971	0.298323	1.22971	up	0.0019301	0.0362164
8653	DDX3Y	DEAD (Asp-Glu-Ala-Asp) box helicase 3, Y-linked	9.36246	9.31744	9.32412	9.40005	9.49894	9.46385	1.08644	0.119607	1.08644	up	0.00193137	0.0362164
202018	TAPT1	transmembrane anterior posterior transformation 1	7.33286	7.35655	7.25469	7.41124	7.57069	7.52252	1.13822	0.186783	1.13822	up	0.00194077	0.0363581
1329	COX5B	cytochrome c oxidase subunit Vb	11.378	11.4219	11.403	11.2845	11.3343	11.3252	-1.06164	-0.0862967	1.06164	down	0.00195204	0.0365517
210	ALAD	aminolevulinate dehydratase	6.97682	6.96771	7.06031	6.67936	6.91744	6.71429	-1.17385	-0.23125	1.17385	down	0.00195322	0.0365563
353088	ZNF429	zinc finger protein 429	6.96221	6.90401	6.99103	6.63029	6.7832	6.8139	-1.15665	-0.209953	1.15665	down	0.00195722	0.0366138
55819	RNF130	ring finger protein 130	8.5685	8.55344	8.58779	8.45991	8.44899	8.4401	-1.08692	-0.120243	1.08692	down	0.00196214	0.0366884
54664	TMEM106B	transmembrane protein 106B	7.21178	7.23243	7.42143	7.55374	7.42363	7.5336	1.16079	0.21511	1.16079	up	0.00198069	0.0369825
51030	TVP23B	trans-golgi network vesicle protein 23 homolog B (S. cerevisiae)	9.99708	10.0054	9.9769	10.1178	10.0458	10.1427	1.07846	0.108967	1.07846	up	0.00198567	0.0370404
201158	TVP23C	trans-golgi network vesicle protein 23 homolog C (S. cerevisiae)	9.99708	10.0054	9.9769	10.1178	10.0458	10.1427	1.07846	0.108967	1.07846	up	0.00198567	0.0370404
6251	RSU1	Ras suppressor protein 1	10.9988	10.9922	10.9854	11.0364	11.1563	11.0997	1.07574	0.105323	1.07574	up	0.00198739	0.0370523
51574	LARP7	La ribonucleoprotein domain family member 7	8.2951	8.35223	8.31371	8.17462	8.08477	8.23577	-1.11365	-0.155293	1.11365	down	0.00198819	0.0370523
2012	EMP1	epithelial membrane protein 1	9.65545	9.66421	9.72206	9.55025	9.57889	9.58893	-1.07765	-0.107883	1.07765	down	0.00199062	0.0370799
5955	RCN2	reticulocalbin 2	9.86303	9.88334	9.83683	10.0439	9.92029	9.97754	1.08637	0.119513	1.08637	up	0.00200417	0.0372971
51083	GAL	galanin/GMAP prepropeptide	6.40702	6.33567	6.3841	6.53789	6.59123	6.57079	1.14159	0.19104	1.14159	up	0.00200834	0.0373393
64924	SLC30A5	solute carrier family 30 (zinc transporter), member 5	7.96115	7.95772	7.96333	8.20437	8.01554	8.19405	1.13073	0.177253	1.13073	up	0.00201018	0.0373559
83852	SETDB2	SET domain, bifurcated 2	5.52925	5.83159	5.91787	6.07535	6.10019	6.04284	1.24248	0.313223	1.24248	up	0.00201799	0.0374657
339501	PRSS38	protease, serine 38	5.59178	5.4817	5.547	5.20112	5.36804	5.28889	-1.19263	-0.254143	1.19263	down	0.00202352	0.0375352
138716	RPP25L	ribonuclease P/MRP 25kDa subunit-like	8.81402	8.836	8.85125	8.67204	8.72806	8.73827	-1.08746	-0.120967	1.08746	down	0.00202365	0.0375352
26272	FBXO4	F-box protein 4	6.27362	6.24036	6.05476	6.5466	6.39601	6.38846	1.1926	0.25411	1.1926	up	0.00203008	0.0376368
7184	HSP90B1	heat shock protein 90kDa beta family member 1	11.2348	11.2765	11.3113	11.216	11.086	11.1707	-1.08421	-0.11665	1.08421	down	0.00203156	0.0376465
22863	ATG14	autophagy related 14	8.46045	8.48902	8.56207	8.36876	8.36053	8.38073	-1.09721	-0.13384	1.09721	down	0.00203572	0.0376882
79918	SETD6	SET domain containing 6	5.92376	5.86532	5.80712	5.70551	5.62655	5.4009	-1.22073	-0.287747	1.22073	down	0.00204301	0.037752
285381	DPH3	diphthamide biosynthesis 3	6.51175	6.69397	6.62185	6.78238	6.80108	6.87568	1.15711	0.210523	1.15711	up	0.00204515	0.0377737
10929	SRSF8	serine/arginine-rich splicing factor 8	5.90169	5.84689	5.92226	6.08254	6.11815	6.09601	1.15558	0.20862	1.15558	up	0.00205485	0.0379179
5910	RAP1GDS1	RAP1, GTP-GDP dissociation stimulator 1	9.51595	9.5468	9.52592	9.62153	9.62977	9.63493	1.07117	0.0991867	1.07117	up	0.00205488	0.0379179
7150	TOP1	topoisomerase (DNA) I	11.0341	11.0587	11.0974	11.0074	10.9222	10.9606	-1.07177	-0.0999933	1.07177	down	0.00205677	0.0379326
10769	PLK2	polo-like kinase 2	9.99076	10.0164	10.0605	9.9419	9.89627	9.91965	-1.07421	-0.10328	1.07421	down	0.00206237	0.0380027
284119	PTRF	polymerase I and transcript release factor	11.0117	11.0333	11.0473	11.0886	11.1231	11.1413	1.0621	0.0869133	1.0621	up	0.00206567	0.0380279
101930123	LOC101930123	eukaryotic elongation factor 2 kinase	8.4009	8.30663	8.27735	8.19914	8.08566	8.20925	-1.12009	-0.16361	1.12009	down	0.00206944	0.0380733
29904	EEF2K	eukaryotic elongation factor 2 kinase	8.4009	8.30663	8.27735	8.19914	8.08566	8.20925	-1.12009	-0.16361	1.12009	down	0.00206944	0.0380733
84678	KDM2B	lysine (K)-specific demethylase 2B	6.94454	6.94704	6.96915	6.73108	6.7526	6.83697	-1.1329	-0.180027	1.1329	down	0.00207487	0.0381343
10130	PDIA6	protein disulfide isomerase family A member 6	11.2539	11.2786	11.2614	11.1626	11.1545	11.2153	-1.06229	-0.0871767	1.06229	down	0.00207533	0.0381343
64760	FAM160B2	family with sequence similarity 160 member B2	7.93148	7.93402	7.96766	7.69908	7.84266	7.80997	-1.11766	-0.160483	1.11766	down	0.00207809	0.0381493
11331	PHB2	prohibitin 2	10.6593	10.6672	10.7195	10.5363	10.5817	10.6194	-1.07389	-0.102843	1.07389	down	0.00207727	0.0381493
5687	PSMA6	proteasome subunit alpha 6	11.5689	11.5674	11.5566	11.5012	11.4472	11.4972	-1.05879	-0.0824133	1.05879	down	0.00208359	0.0382326
9692	KIAA0391	KIAA0391	11.5689	11.5674	11.5566	11.5012	11.4472	11.4972	-1.05879	-0.0824133	1.05879	down	0.00208359	0.0382326
54682	MANSC1	MANSC domain containing 1	6.80563	6.9515	6.88852	7.14485	7.0122	7.08289	1.14718	0.198097	1.14718	up	0.00208533	0.0382465
9610	RIN1	Ras and Rab interactor 1	8.14856	8.03398	8.05935	7.86985	7.98702	7.89759	-1.11921	-0.162477	1.11921	down	0.00208768	0.0382719
57556	SEMA6A	sema domain, transmembrane domain (TM), and cytoplasmic domain, (semaphorin) 6A	8.5917	8.56083	8.63088	8.78232	8.67358	8.734	1.09847	0.135497	1.09847	up	0.00209379	0.0383303
54205	CYCS	cytochrome c, somatic	11.3951	11.4028	11.4072	11.495	11.457	11.4905	1.0564	0.0791567	1.0564	up	0.00209268	0.0383303
11051	NUDT21	nudix hydrolase 21	9.66971	9.69796	9.69321	9.63172	9.4788	9.55764	-1.09498	-0.130907	1.09498	down	0.00209611	0.0383549
27332	ZNF638	zinc finger protein 638	6.00282	6.04874	5.98774	6.18925	6.36233	6.18153	1.17387	0.23127	1.17387	up	0.00210354	0.038473
3185	HNRNPF	heterogeneous nuclear ribonucleoprotein F	9.7298	9.7814	9.79336	9.63334	9.63952	9.70002	-1.07965	-0.11056	1.07965	down	0.00211216	0.0385948
27248	ERLEC1	endoplasmic reticulum lectin 1	9.85081	9.87526	9.85032	9.92515	9.96701	9.98219	1.07127	0.09932	1.07127	up	0.00211355	0.0386022
10741	RBBP9	retinoblastoma binding protein 9	7.75999	7.71197	7.79419	7.59549	7.61329	7.61606	-1.10734	-0.147103	1.10734	down	0.00211838	0.0386545
51164	DCTN4	dynactin subunit 4	8.19967	8.22278	8.29645	8.10753	8.08576	8.11037	-1.10069	-0.138413	1.10069	down	0.00212065	0.038678
36	ACADSB	acyl-CoA dehydrogenase, short/branched chain	5.37252	5.39482	5.34745	5.58376	5.65949	5.56503	1.17378	0.231163	1.17378	up	0.00212479	0.0387176
64423	INF2	inverted formin, FH2 and WH2 domain containing	7.93165	7.88692	7.92196	8.00913	8.05235	8.11984	1.10721	0.14693	1.10721	up	0.00212637	0.0387286
135112	NCOA7	nuclear receptor coactivator 7	6.06053	6.12208	6.17974	6.29957	6.31213	6.38002	1.15652	0.20979	1.15652	up	0.00212841	0.0387477
7919	DDX39B	DEAD (Asp-Glu-Ala-Asp) box polypeptide 39B	10.4876	10.4685	10.4249	10.2961	10.3732	10.3867	-1.07795	-0.108293	1.07795	down	0.00213447	0.0387588
100532737	ATP6V1G2-DDX39B	ATP6V1G2-DDX39B readthrough (NMD candidate)	10.4876	10.4685	10.4249	10.2961	10.3732	10.3867	-1.07795	-0.108293	1.07795	down	0.00213447	0.0387588
57654	UVSSA	UV stimulated scaffold protein A	8.10169	8.06494	8.18355	7.88171	7.98692	7.99452	-1.1191	-0.162343	1.1191	down	0.0021369	0.0387588
84419	C15orf48	chromosome 15 open reading frame 48	6.68443	6.8597	6.84521	6.90144	7.20448	7.07117	1.19962	0.262583	1.19962	up	0.00213419	0.0387588
677813	SNORA30	small nucleolar RNA, H/ACA box 30	6.07232	5.85931	5.91463	5.81058	5.50055	5.63048	-1.23247	-0.30155	1.23247	down	0.00213202	0.0387588
115286	SLC25A26	solute carrier family 25 (S-adenosylmethionine carrier), member 26	8.3891	8.38754	8.45702	8.22923	8.33069	8.24499	-1.10414	-0.142917	1.10414	down	0.00213689	0.0387588
94241	TP53INP1	tumor protein p53 inducible nuclear protein 1	10.5876	10.635	10.5982	10.507	10.4887	10.5434	-1.06723	-0.0938667	1.06723	down	0.00214177	0.0388188
4045	LSAMP	limbic system-associated membrane protein	7.0497	7.07116	6.99607	7.12783	7.26071	7.32275	1.1472	0.19812	1.1472	up	0.00214317	0.0388188
149473	CCDC24	coiled-coil domain containing 24	6.85759	6.89639	6.85632	6.71004	6.65722	6.71551	-1.12962	-0.175843	1.12962	down	0.00214226	0.0388188
7991	TUSC3	tumor suppressor candidate 3	11.0447	11.0041	10.9693	11.1258	11.072	11.1041	1.06772	0.09454	1.06772	up	0.002153	0.0389789
11007	CCDC85B	coiled-coil domain containing 85B	10.1097	10.116	10.0855	9.95901	10.027	10.0216	-1.07266	-0.101187	1.07266	down	0.00216095	0.0390869
8837	CFLAR	CASP8 and FADD like apoptosis regulator	7.22169	7.22447	7.19714	7.29385	7.42535	7.51748	1.14694	0.197793	1.14694	up	0.00216256	0.039098
388753	COA6	cytochrome c oxidase assembly factor 6	9.1128	9.14747	9.18836	8.98715	9.01855	9.07282	-1.08928	-0.12337	1.08928	down	0.00216734	0.0391664
259232	NALCN	sodium leak channel, non selective	6.82677	6.86779	6.89601	6.98916	7.13057	7.03128	1.13825	0.186813	1.13825	up	0.00217587	0.0393024
22926	ATF6	activating transcription factor 6	7.81672	7.83387	7.83387	7.99863	7.91313	8.00726	1.10562	0.144853	1.10562	up	0.00217687	0.0393026
51094	ADIPOR1	adiponectin receptor 1	9.67367	9.70579	9.75228	9.83864	9.79505	9.81827	1.07679	0.10674	1.07679	up	0.00217868	0.0393171
6418	SET	SET nuclear proto-oncogene	11.1751	11.1767	11.1673	11.0696	11.107	11.0994	-1.05775	-0.0810033	1.05775	down	0.00218203	0.0393235
1958	EGR1	early growth response 1	7.86284	7.75463	7.69626	7.55412	7.66647	7.53262	-1.13827	-0.18684	1.13827	down	0.00218138	0.0393235
26115	TANC2	tetratricopeptide repeat, ankyrin repeat and coiled-coil containing 2	8.31077	8.31551	8.38031	8.44664	8.48355	8.4619	1.09316	0.1285	1.09316	up	0.00218379	0.0393372
25903	OLFML2B	olfactomedin like 2B	4.43967	4.49623	4.38649	4.09953	4.25564	4.07041	-1.23024	-0.298937	1.23024	down	0.00220111	0.039613
84687	PPP1R9B	protein phosphatase 1 regulatory subunit 9B	8.41913	8.42459	8.42832	8.32481	8.31201	8.25346	-1.09221	-0.127253	1.09221	down	0.00220841	0.0397261
6795	AURKC	aurora kinase C	4.44041	4.56331	4.3627	4.04315	4.20222	4.19278	-1.23921	-0.309423	1.23921	down	0.00221143	0.0397553
11343	MGLL	monoglyceride lipase	10.0345	10.0831	10.1236	10.1435	10.208	10.2327	1.08245	0.1143	1.08245	up	0.00221293	0.0397553
10140	TOB1	transducer of ERBB2, 1	9.11457	9.1191	9.09217	9.22967	9.2033	9.20967	1.07594	0.1056	1.07594	up	0.00221306	0.0397553
9709	HERPUD1	homocysteine-inducible, endoplasmic reticulum stress-inducible, ubiquitin-like domain member 1	9.26689	9.27717	9.36554	9.40985	9.40505	9.46103	1.08833	0.12211	1.08833	up	0.00221546	0.039762
340481	ZDHHC21	zinc finger, DHHC-type containing 21	5.81216	5.76432	5.88028	6.0798	5.97726	6.06847	1.1671	0.222923	1.1671	up	0.00221872	0.0398024
1400	CRMP1	collapsin response mediator protein 1	6.91475	6.84933	6.82602	6.65374	6.69986	6.69755	-1.13261	-0.17965	1.13261	down	0.00223006	0.0399512
81030	ZBP1	Z-DNA binding protein 1	5.08701	5.09604	5.02356	4.86313	4.74526	4.82963	-1.19433	-0.256197	1.19433	down	0.00223523	0.0400256
977	CD151	CD151 molecule (Raph blood group)	10.8832	10.919	10.8773	10.9529	10.9957	10.9937	1.0626	0.0875967	1.0626	up	0.00223849	0.0400657
593	BCKDHA	branched chain keto acid dehydrogenase E1, alpha polypeptide	7.03585	7.13175	7.09939	7.2164	7.27317	7.28502	1.12443	0.1692	1.12443	up	0.00224203	0.0401109
1104	RCC1	regulator of chromosome condensation 1	6.34273	6.32725	6.39889	6.07309	6.19236	6.17901	-1.1552	-0.208137	1.1552	down	0.00224364	0.0401213
400	ARL1	ADP ribosylation factor like GTPase 1	9.56113	9.63396	9.61703	9.78588	9.65908	9.74932	1.09231	0.127387	1.09231	up	0.00224663	0.0401534
8880	FUBP1	far upstream element (FUSE) binding protein 1	8.5219	8.5396	8.62287	8.66556	8.67857	8.77958	1.10684	0.146447	1.10684	up	0.00224808	0.0401534
9145	SYNGR1	synaptogyrin 1	8.86388	8.99726	8.99327	9.08568	9.06433	9.12459	1.10195	0.140063	1.10195	up	0.00224849	0.0401534
28956	LAMTOR2	late endosomal/lysosomal adaptor, MAPK and MTOR activator 2	9.49517	9.48604	9.52618	9.35743	9.37531	9.43905	-1.08063	-0.111867	1.08063	down	0.00226038	0.0403108
23344	ESYT1	extended synaptotagmin-like protein 1	10.7849	10.8109	10.8135	10.7127	10.7013	10.7384	-1.06115	-0.0856233	1.06115	down	0.00226488	0.0403727
26471	NUPR1	nuclear protein 1, transcriptional regulator	10.317	10.3544	10.3722	10.401	10.4764	10.4748	1.0739	0.102853	1.0739	up	0.00226668	0.0403865
51374	ATRAID	all-trans retinoic acid induced differentiation factor	10.4744	10.546	10.5749	10.632	10.627	10.6411	1.07295	0.101577	1.07295	up	0.00226994	0.0404264
51002	TPRKB	TP53RK binding protein	7.78378	7.71497	7.76366	7.63795	7.5944	7.59157	-1.10662	-0.146163	1.10662	down	0.00227321	0.0404419
55754	TMEM30A	transmembrane protein 30A	10.7825	10.7863	10.7679	10.8887	10.8248	10.9055	1.06738	0.09408	1.06738	up	0.0022727	0.0404419
8718	TNFRSF25	tumor necrosis factor receptor superfamily member 25	7.93669	7.73801	7.88137	7.49736	7.72634	7.665	-1.16672	-0.222457	1.16672	down	0.00227603	0.0404616
116496	FAM129A	family with sequence similarity 129 member A	7.21367	7.23302	7.10069	6.94841	7.04212	7.00392	-1.13627	-0.18431	1.13627	down	0.00228195	0.0405406
5315	PKM	pyruvate kinase, muscle	12.1327	12.1313	12.076	12.046	12.0277	12.0291	-1.05633	-0.0790567	1.05633	down	0.00228254	0.0405406
51761	ATP8A2	ATPase, aminophospholipid transporter, class I, type 8A, member 2	4.84225	4.86546	4.90608	4.62123	4.47729	4.67896	-1.21316	-0.27877	1.21316	down	0.00228358	0.0405407
9798	IST1	increased sodium tolerance 1 homolog (yeast)	9.90183	9.88057	9.902	9.81944	9.77238	9.80229	-1.06937	-0.0967633	1.06937	down	0.00228822	0.0405704
3949	LDLR	low density lipoprotein receptor	7.88364	7.77323	7.83133	7.92421	8.06325	7.99404	1.12073	0.164433	1.12073	up	0.0022868	0.0405704
116535	MRGPRF	MAS related GPR family member F	10.3551	10.3698	10.3467	10.2413	10.2835	10.2755	-1.06469	-0.0904367	1.06469	down	0.0022954	0.0406589
10106	CTDSP2	CTD small phosphatase 2	10.6221	10.6062	10.5911	10.4967	10.5165	10.5411	-1.06317	-0.0883667	1.06317	down	0.00229734	0.040675
7095	SEC62	SEC62 homolog, preprotein translocation factor	11.3977	11.4226	11.4327	11.5006	11.4727	11.529	1.05929	0.0830967	1.05929	up	0.00229954	0.0406956
6300	MAPK12	mitogen-activated protein kinase 12	7.86308	7.85638	7.91045	7.71523	7.68738	7.78245	-1.10825	-0.148283	1.10825	down	0.0023009	0.0407012
284	ANGPT1	angiopoietin 1	8.83218	8.75816	8.85192	9.2123	8.89453	8.99199	1.16381	0.218853	1.16381	up	0.00230976	0.0408396
29104	N6AMT1	N-6 adenine-specific DNA methyltransferase 1 (putative)	7.26977	7.2895	7.3194	7.469	7.40826	7.46519	1.11311	0.154593	1.11311	up	0.00231645	0.0409213
81539	SLC38A1	solute carrier family 38, member 1	7.32807	7.36569	7.33388	7.44742	7.55198	7.50352	1.11607	0.158427	1.11607	up	0.00232272	0.0409767
7286	TUFT1	tuftelin 1	7.37341	7.43567	7.44161	7.50195	7.61686	7.64821	1.12671	0.17211	1.12671	up	0.00232499	0.0409984
824	CAPN2	calpain 2, (m/II) large subunit	11.3072	11.3004	11.3393	11.2429	11.1261	11.2467	-1.07952	-0.11039	1.07952	down	0.00232731	0.0410209
51690	LSM7	LSM7 homolog, U6 small nuclear RNA and mRNA degradation associated	10.6237	10.6276	10.628	10.4716	10.5579	10.5529	-1.07099	-0.0989467	1.07099	down	0.00232907	0.0410283
29089	UBE2T	ubiquitin conjugating enzyme E2T	8.15065	8.17885	8.13036	7.94715	8.0396	8.04504	-1.10396	-0.14269	1.10396	down	0.00232982	0.0410283
984	CDK11B	cyclin-dependent kinase 11B	8.61339	8.63702	8.57427	8.49575	8.46333	8.49969	-1.08822	-0.12197	1.08822	down	0.00233506	0.0410839
64081	PBLD	phenazine biosynthesis-like protein domain containing	7.77908	7.86222	7.78872	7.97058	7.92007	7.9734	1.10548	0.144677	1.10548	up	0.00233452	0.0410839
728642	CDK11A	cyclin-dependent kinase 11A	8.61339	8.63702	8.57427	8.49575	8.46333	8.49969	-1.08822	-0.12197	1.08822	down	0.00233506	0.0410839
1767	DNAH5	dynein, axonemal, heavy chain 5	7.34034	7.4075	7.45201	7.49725	7.65785	7.58583	1.13317	0.18036	1.13317	up	0.0023435	0.0412004
83443	SF3B5	splicing factor 3b subunit 5	11.8887	11.904	11.8738	11.8564	11.7605	11.7664	-1.06766	-0.0944467	1.06766	down	0.00234378	0.0412004
79174	CRELD2	cysteine rich with EGF-like domains 2	10.1005	10.1251	10.0507	9.96428	10.0228	9.97555	-1.07515	-0.10454	1.07515	down	0.00235399	0.0413614
57720	GPR107	G protein-coupled receptor 107	7.55588	7.53949	7.47936	7.66576	7.64998	7.71125	1.11015	0.150753	1.11015	up	0.00235814	0.0414159
11100	HNRNPUL1	heterogeneous nuclear ribonucleoprotein U-like 1	9.35904	9.40894	9.49562	9.29873	9.27137	9.31072	-1.09247	-0.127593	1.09247	down	0.00236176	0.0414339
6767	ST13	suppression of tumorigenicity 13 (colon carcinoma) (Hsp70 interacting protein)	10.1715	10.183	10.2061	10.0606	10.114	10.1008	-1.06813	-0.0950833	1.06813	down	0.00236319	0.0414339
5781	PTPN11	protein tyrosine phosphatase, non-receptor type 11	6.42451	6.52632	6.46843	6.64085	6.69961	6.64515	1.1398	0.188783	1.1398	up	0.00236072	0.0414339
5660	PSAP	prosaposin	11.8782	11.8451	11.8091	11.7032	11.7985	11.7391	-1.06969	-0.0971933	1.06969	down	0.00236755	0.0414345
6745	SSR1	signal sequence receptor, alpha	8.92686	8.86198	8.86583	8.6764	8.77927	8.79138	-1.09876	-0.135873	1.09876	down	0.00236785	0.0414345
9644	SH3PXD2A	SH3 and PX domains 2A	10.9848	11.0137	11.0063	11.066	11.0872	11.0953	1.05794	0.0812567	1.05794	up	0.00236509	0.0414345
388969	C2orf68	chromosome 2 open reading frame 68	5.90736	5.94091	6.01309	5.65384	5.7654	5.7654	-1.16924	-0.225573	1.16924	down	0.00237565	0.0415011
6560	SLC12A4	solute carrier family 12 (potassium/chloride transporter), member 4	8.8018	8.74217	8.83924	8.9153	8.89399	8.94785	1.09024	0.124643	1.09024	up	0.0023811	0.0415593
1028	CDKN1C	cyclin-dependent kinase inhibitor 1C (p57, Kip2)	7.37948	7.21819	7.14933	6.95235	7.13938	6.93811	-1.18022	-0.239053	1.18022	down	0.00238693	0.0416058
6878	TAF6	TATA-box binding protein associated factor 6	8.62725	8.56683	8.59926	8.47875	8.43328	8.50377	-1.09115	-0.125847	1.09115	down	0.00238593	0.0416058
26040	SETBP1	SET binding protein 1	4.88155	5.14279	5.20098	5.35722	5.30988	5.53596	1.25346	0.325913	1.25346	up	0.00239137	0.0416647
10521	DDX17	DEAD (Asp-Glu-Ala-Asp) box helicase 17	11.6907	11.6803	11.6814	11.593	11.6137	11.6226	-1.05291	-0.0743833	1.05291	down	0.00239798	0.0417614
55716	LMBR1L	limb development membrane protein 1-like	7.57395	7.45224	7.39458	7.28939	7.34655	7.16995	-1.15265	-0.20496	1.15265	down	0.00240148	0.0418039
221491	C6orf1	chromosome 6 open reading frame 1	7.89348	8.01349	7.92212	7.70605	7.81281	7.81693	-1.12073	-0.164433	1.12073	down	0.00240636	0.0418702
56648	EIF5A2	eukaryotic translation initiation factor 5A2	8.37012	8.42328	8.41273	8.51572	8.50466	8.55811	1.08984	0.12412	1.08984	up	0.0024103	0.0419203
3105	HLA-A	major histocompatibility complex, class I, A	9.19671	9.20992	9.2104	9.08292	9.13179	9.07976	-1.07737	-0.10752	1.07737	down	0.00241885	0.0420318
122773	KLHDC1	kelch domain containing 1	5.10173	5.1605	5.17948	5.43619	5.32792	5.39639	1.18066	0.239597	1.18066	up	0.0024264	0.0420701
4311	MME	membrane metallo-endopeptidase	5.16381	5.30876	5.16651	4.89026	5.06709	4.78954	-1.22892	-0.297397	1.22892	down	0.00242451	0.0420701
177	AGER	advanced glycosylation end product-specific receptor	6.43115	6.36676	6.25558	6.1662	6.11424	6.12854	-1.16057	-0.214837	1.16057	down	0.00242911	0.0420985
115106	HAUS1	HAUS augmin like complex subunit 1	8.3369	8.2977	8.33809	8.1471	8.20841	8.22347	-1.09523	-0.131237	1.09523	down	0.00243211	0.0421133
24139	EML2	echinoderm microtubule associated protein like 2	6.61224	6.55471	6.51417	6.74091	6.77863	6.71419	1.13619	0.184203	1.13619	up	0.00243787	0.0421945
221662	RBM24	RNA binding motif protein 24	6.16445	6.13909	6.0868	6.26706	6.42848	6.33532	1.1595	0.213507	1.1595	up	0.00244539	0.0422319
54625	PARP14	poly(ADP-ribose) polymerase family member 14	8.61731	8.60517	8.64967	8.50899	8.22821	8.49782	-1.1586	-0.212377	1.1586	down	0.00244518	0.0422319
26586	CKAP2	cytoskeleton associated protein 2	8.33874	8.35679	8.40955	8.23012	8.23821	8.25566	-1.09204	-0.12703	1.09204	down	0.00244488	0.0422319
3301	DNAJA1	DnaJ heat shock protein family (Hsp40) member A1	11.6851	11.6408	11.6726	11.6176	11.5064	11.5776	-1.07101	-0.09897	1.07101	down	0.00244169	0.0422319
5089	PBX2	pre-B-cell leukemia homeobox 2	6.84659	6.80244	6.88715	6.62718	6.70929	6.65819	-1.13328	-0.180507	1.13328	down	0.00245343	0.042315
1431	CS	citrate synthase	8.21331	8.22782	8.17758	8.08004	8.07878	8.08004	-1.09173	-0.126617	1.09173	down	0.00245323	0.042315
55254	TMEM39A	transmembrane protein 39A	7.7401	7.70923	7.74628	7.86264	7.8637	7.87323	1.09783	0.134653	1.09783	up	0.00245206	0.042315
80777	CYB5B	cytochrome b5 type B (outer mitochondrial membrane)	9.90216	9.90927	9.93043	9.99177	10.0018	10.0287	1.06692	0.0934567	1.06692	up	0.00245496	0.0423228
1317	SLC31A1	solute carrier family 31 (copper transporter), member 1	8.34579	8.39343	8.34495	8.46172	8.49916	8.49072	1.0886	0.122477	1.0886	up	0.00246192	0.0424144
157247	MGC27345	uncharacterized protein MGC27345	6.91732	6.85698	6.93856	6.72221	6.67081	6.77493	-1.13417	-0.181637	1.13417	down	0.0024749	0.0425191
26050	SLITRK5	SLIT and NTRK like family member 5	5.84862	5.69001	5.63813	5.47254	5.54993	5.30873	-1.21576	-0.281853	1.21576	down	0.00247586	0.0425191
56943	ENY2	enhancer of yellow 2 homolog (Drosophila)	10.2494	10.2348	10.1853	10.1247	10.1106	10.1452	-1.06906	-0.0963467	1.06906	down	0.0024738	0.0425191
148398	SAMD11	sterile alpha motif domain containing 11	7.68297	7.68129	7.73787	7.5389	7.57938	7.55187	-1.10496	-0.143993	1.10496	down	0.00247765	0.0425191
27	ABL2	ABL proto-oncogene 2, non-receptor tyrosine kinase	8.67603	8.66739	8.74055	8.79437	8.83156	8.81738	1.08657	0.11978	1.08657	up	0.00247769	0.0425191
55131	RBM28	RNA binding motif protein 28	6.91732	6.85698	6.93856	6.72221	6.67081	6.77493	-1.13417	-0.181637	1.13417	down	0.0024749	0.0425191
387680	FAM21A	family with sequence similarity 21 member A	10.4998	10.4582	10.4148	10.334	10.4022	10.299	-1.08115	-0.112567	1.08115	down	0.00248126	0.0425338
253725	FAM21C	family with sequence similarity 21 member C	10.4998	10.4582	10.4148	10.334	10.4022	10.299	-1.08115	-0.112567	1.08115	down	0.00248126	0.0425338
10618	TGOLN2	trans-golgi network protein 2	7.35379	7.37594	7.37323	7.47015	7.61602	7.51489	1.12197	0.166033	1.12197	up	0.00248347	0.0425532
55500	ETNK1	ethanolamine kinase 1	7.21359	7.2016	7.23281	7.41782	7.31282	7.40364	1.11891	0.162093	1.11891	up	0.00248777	0.0425773
11027	LILRA2	leukocyte immunoglobulin-like receptor, subfamily A (with TM domain), member 2	6.57386	6.3015	6.29493	6.14744	6.17451	6.04015	-1.2053	-0.269397	1.2053	down	0.00248663	0.0425773
1047	CLGN	calmegin	5.9293	6.06118	6.06597	5.72908	5.69001	5.89032	-1.18839	-0.249013	1.18839	down	0.00248812	0.0425773
11217	AKAP2	A-kinase anchoring protein 2	12.1386	12.1386	12.1977	12.2476	12.2156	12.2537	1.05752	0.0806867	1.05752	up	0.00249519	0.0426797
445815	PALM2-AKAP2	PALM2-AKAP2 readthrough	12.1386	12.1386	12.1977	12.2476	12.2156	12.2537	1.05752	0.0806867	1.05752	up	0.00249519	0.0426797
2794	GNL1	guanine nucleotide binding protein-like 1	5.93651	6.05076	6.14644	5.88442	5.76094	5.74893	-1.1863	-0.246473	1.1863	down	0.00249733	0.0426977
1186	CLCN7	chloride channel, voltage-sensitive 7	8.92062	8.91333	8.91454	8.79609	8.8143	8.81488	-1.07754	-0.10774	1.07754	down	0.00249898	0.0427073
8493	PPM1D	protein phosphatase, Mg2+/Mn2+ dependent 1D	8.33277	8.34725	8.33433	8.48166	8.41627	8.49417	1.0912	0.125917	1.0912	up	0.00250505	0.0427555
5150	PDE7A	phosphodiesterase 7A	7.15217	7.15083	7.24553	6.98074	6.96591	7.06929	-1.13095	-0.17753	1.13095	down	0.00250991	0.042786
3213	HOXB3	homeobox B3	10.3758	10.3799	10.4208	10.3338	10.1392	10.2766	-1.10369	-0.142337	1.10369	down	0.00251011	0.042786
130507	UBR3	ubiquitin protein ligase E3 component n-recognin 3 (putative)	7.40753	7.44116	7.41652	7.57995	7.54625	7.57151	1.10509	0.144167	1.10509	up	0.00251174	0.0427953
5032	P2RY11	purinergic receptor P2Y, G-protein coupled, 11	6.1528	6.21695	6.07101	5.94306	5.97801	5.84127	-1.1697	-0.22614	1.1697	down	0.00251405	0.0428161
692312	PPAN-P2RY11	PPAN-P2RY11 readthrough	6.1528	6.21695	6.07101	5.94306	5.97801	5.84127	-1.1697	-0.22614	1.1697	down	0.00251405	0.0428161
91252	SLC39A13	solute carrier family 39 (zinc transporter), member 13	9.19707	9.20848	9.26967	9.29984	9.37859	9.34765	1.08444	0.116953	1.08444	up	0.0025156	0.0428239
51330	TNFRSF12A	tumor necrosis factor receptor superfamily member 12A	10.7714	10.7827	10.7927	10.8508	10.8621	10.8786	1.05813	0.0815167	1.05813	up	0.00252313	0.0428964
23647	ARFIP2	ADP ribosylation factor interacting protein 2	9.74448	9.67171	9.75363	9.5788	9.64228	9.61431	-1.08033	-0.111477	1.08033	down	0.00252105	0.0428964
345757	FAM174A	family with sequence similarity 174 member A	6.61733	6.71367	6.69257	6.85123	6.80256	6.97107	1.14904	0.20043	1.14904	up	0.00252236	0.0428964
23200	ATP11B	ATPase, class VI, type 11B	7.52233	7.55551	7.65745	7.74243	7.75013	7.71739	1.11591	0.15822	1.11591	up	0.00252888	0.0429571
8050	PDHX	pyruvate dehydrogenase complex component X	8.93168	8.99572	8.9274	9.15226	9.02086	9.083	1.09716	0.133773	1.09716	up	0.00253198	0.0429912
1642	DDB1	damage-specific DNA binding protein 1	9.43273	9.4468	9.4631	9.27304	9.34072	9.38109	-1.08367	-0.115927	1.08367	down	0.00254098	0.0431254
6645	SNTB2	syntrophin, beta 2 (dystrophin-associated protein A1, 59kDa, basic component 2)	7.68509	7.71628	7.78058	7.82823	7.8951	7.90964	1.10983	0.15034	1.10983	up	0.0025524	0.0432873
65009	NDRG4	NDRG family member 4	5.54494	5.62569	5.789	5.45044	5.32089	5.39095	-1.20229	-0.265783	1.20229	down	0.00255272	0.0432873
58477	SRPRB	SRP receptor beta subunit	10.2636	10.2859	10.3024	10.3544	10.3821	10.3821	1.06358	0.0889267	1.06358	up	0.00255567	0.0433186
5900	RALGDS	ral guanine nucleotide dissociation stimulator	8.95671	9.00609	9.00609	8.84435	8.88089	8.90061	-1.08248	-0.114347	1.08248	down	0.00256564	0.0434502
23187	PHLDB1	pleckstrin homology-like domain, family B, member 1	5.78191	5.76141	5.74937	5.55675	5.46539	5.59827	-1.16804	-0.224093	1.16804	down	0.00257158	0.0435133
3603	IL16	interleukin 16	5.49517	5.50604	5.44597	5.28907	5.28361	5.15684	-1.18035	-0.23922	1.18035	down	0.00257516	0.0435552
23065	EMC1	ER membrane protein complex subunit 1	8.72931	8.69145	8.76733	8.81832	8.85501	8.87502	1.0868	0.120087	1.0868	up	0.00258279	0.0436625
201562	HACD2	3-hydroxyacyl-CoA dehydratase 2	7.39766	7.42144	7.38614	7.55224	7.52647	7.55938	1.10518	0.144283	1.10518	up	0.00258484	0.0436625
9512	PMPCB	peptidase (mitochondrial processing) beta	7.56744	7.54596	7.46376	7.46591	7.21089	7.24595	-1.16323	-0.218137	1.16323	down	0.00258472	0.0436625
2055	CLN8	ceroid-lipofuscinosis, neuronal 8	7.79969	7.78629	7.78677	7.97349	7.9879	7.86279	1.10994	0.150477	1.10994	up	0.00258609	0.043665
3959	LGALS3BP	lectin, galactoside-binding, soluble, 3 binding protein	9.59703	9.61352	9.58902	9.43937	9.53672	9.49374	-1.07916	-0.109913	1.07916	down	0.00258837	0.0436846
8724	SNX3	sorting nexin 3	11.1396	11.1509	11.155	11.0177	11.0723	11.0924	-1.0627	-0.08773	1.0627	down	0.00259061	0.0437038
54680	ZNHIT6	zinc finger, HIT-type containing 6	9.43927	9.46907	9.51269	9.56534	9.57123	9.60126	1.07594	0.1056	1.07594	up	0.00259191	0.043707
23214	XPO6	exportin 6	9.73363	9.79158	9.81566	9.85739	9.87862	9.94948	1.08288	0.114873	1.08288	up	0.00259805	0.0437729
8607	RUVBL1	RuvB-like AAA ATPase 1	8.95858	8.95642	9.06796	8.84067	8.85439	8.89628	-1.0947	-0.13054	1.0947	down	0.00260046	0.043776
548645	DNAJC25	DnaJ heat shock protein family (Hsp40) member C25	6.61393	6.53851	6.61795	6.85022	6.69515	6.81965	1.14727	0.19821	1.14727	up	0.00260187	0.0437812
57631	LRCH2	leucine-rich repeats and calponin homology (CH) domain containing 2	7.45633	7.45863	7.40479	7.58304	7.6199	7.56046	1.10794	0.147883	1.10794	up	0.00261064	0.0439099
6428	SRSF3	serine/arginine-rich splicing factor 3	4.43397	4.34232	4.46619	4.11938	3.83181	4.22526	-1.27929	-0.355343	1.27929	down	0.00261298	0.0439117
134957	STXBP5	syntaxin binding protein 5 (tomosyn)	7.45361	7.35148	7.35572	7.12287	7.26483	7.23243	-1.13306	-0.180227	1.13306	down	0.00261205	0.0439117
1611	DAP	death-associated protein	10.8379	10.8652	10.9477	10.9702	10.9985	10.9858	1.07272	0.101273	1.07272	up	0.00261524	0.0439309
1981	EIF4G1	eukaryotic translation initiation factor 4 gamma, 1	9.19147	9.16881	9.22118	9.25621	9.36172	9.32018	1.08589	0.118883	1.08589	up	0.00262048	0.0439626
130589	GALM	galactose mutarotase (aldose 1-epimerase)	7.03456	7.17908	7.06564	7.35569	7.18847	7.33316	1.14818	0.199347	1.14818	up	0.00262861	0.0440614
166929	SGMS2	sphingomyelin synthase 2	6.23122	6.13231	6.19786	6.37595	6.37542	6.38874	1.14306	0.192907	1.14306	up	0.00264245	0.0442369
5683	PSMA2	proteasome subunit alpha 2	10.9562	10.9239	10.941	10.8728	10.8055	10.8714	-1.06472	-0.0904767	1.06472	down	0.00264133	0.0442369
5495	PPM1B	protein phosphatase, Mg2+/Mn2+ dependent 1B	8.05662	8.01193	8.07167	8.15781	8.25843	8.15342	1.10431	0.143147	1.10431	up	0.00264995	0.0443247
528	ATP6V1C1	ATPase, H+ transporting, lysosomal 42kDa, V1 subunit C1	8.72681	8.70055	8.84297	8.91318	8.87311	8.89618	1.09991	0.13738	1.09991	up	0.00265274	0.0443525
5445	PON2	paraoxonase 2	10.184	10.1789	10.1813	10.2416	10.2918	10.281	1.06442	0.0900733	1.06442	up	0.00265833	0.0444271
4811	NID1	nidogen 1	8.76141	8.75312	8.73308	8.85188	8.83981	8.89469	1.08142	0.112923	1.08142	up	0.00266211	0.0444713
3192	HNRNPU	heterogeneous nuclear ribonucleoprotein U (scaffold attachment factor A)	10.6835	10.7046	10.7182	10.6087	10.5971	10.6415	-1.06167	-0.08634	1.06167	down	0.00266608	0.0445188
55905	RNF114	ring finger protein 114	9.79635	9.86992	9.82595	9.90941	9.95044	9.93526	1.07249	0.100963	1.07249	up	0.002679	0.0446965
3728	JUP	junction plakoglobin	8.49339	8.40355	8.45531	8.28712	8.30866	8.35896	-1.09619	-0.132503	1.09619	down	0.00268325	0.0447485
55008	HERC6	HECT and RLD domain containing E3 ubiquitin protein ligase family member 6	5.87006	5.60121	5.75192	5.50671	5.49335	5.44254	-1.19764	-0.260197	1.19764	down	0.00268888	0.0448234
8473	OGT	O-linked N-acetylglucosamine (GlcNAc) transferase	7.7307	7.6591	7.73305	7.79455	7.86692	7.96854	1.12432	0.169053	1.12432	up	0.0026904	0.0448298
100528018	ARL2-SNX15	ARL2-SNX15 readthrough (NMD candidate)	9.24603	9.26447	9.27462	9.08504	9.15784	9.19073	-1.08461	-0.11717	1.08461	down	0.00269907	0.0449552
402	ARL2	ADP ribosylation factor like GTPase 2	9.24603	9.26447	9.27462	9.08504	9.15784	9.19073	-1.08461	-0.11717	1.08461	down	0.00269907	0.0449552
89872	AQP10	aquaporin 10	5.86874	5.84076	5.82803	5.65251	5.67123	5.56716	-1.16114	-0.215543	1.16114	down	0.00270664	0.0450241
3146	HMGB1	high mobility group box 1	9.86711	9.93047	9.8988	9.77253	9.80595	9.81855	-1.07161	-0.0997833	1.07161	down	0.00271409	0.0451099
9603	NFE2L3	nuclear factor, erythroid 2 like 3	7.03893	6.95636	7.17954	7.2236	7.23322	7.34393	1.1556	0.20864	1.1556	up	0.00271649	0.0451307
116447	TOP1MT	topoisomerase (DNA) I, mitochondrial	7.91463	7.84198	7.94537	7.60274	7.8404	7.66966	-1.14583	-0.196393	1.14583	down	0.00272059	0.0451606
5570	PKIB	protein kinase (cAMP-dependent, catalytic) inhibitor beta	4.95866	5.12356	5.22406	5.22025	5.54155	5.57225	1.26803	0.34259	1.26803	up	0.0027195	0.0451606
80310	PDGFD	platelet derived growth factor D	5.35687	5.42812	5.67453	5.2056	5.02216	5.27119	-1.24849	-0.32019	1.24849	down	0.00272392	0.0451836
3091	HIF1A	hypoxia inducible factor 1, alpha subunit (basic helix-loop-helix transcription factor)	10.2639	10.2836	10.3072	10.1611	10.1692	10.2315	-1.07003	-0.0976533	1.07003	down	0.00272896	0.0452232
27301	APEX2	APEX nuclease (apurinic/apyrimidinic endonuclease) 2	6.54697	6.52817	6.63684	6.25521	6.48686	6.25149	-1.18056	-0.239473	1.18056	down	0.00272838	0.0452232
3308	HSPA4	heat shock protein family A (Hsp70) member 4	10.1625	10.1774	10.1456	10.0962	9.99038	10.0764	-1.07739	-0.10754	1.07739	down	0.00273177	0.0452451
23731	TMEM245	transmembrane protein 245	9.62475	9.60767	9.67548	9.70196	9.75403	9.77647	1.07787	0.108187	1.07787	up	0.00273593	0.0452625
8727	CTNNAL1	catenin alpha-like 1	9.62475	9.60767	9.67548	9.70196	9.75403	9.77647	1.07787	0.108187	1.07787	up	0.00273593	0.0452625
23568	ARL2BP	ADP ribosylation factor like GTPase 2 binding protein	11	10.9834	10.9924	11.0485	11.0824	11.0845	1.05691	0.07985	1.05691	up	0.00274959	0.0454444
8805	TRIM24	tripartite motif containing 24	6.56231	6.62952	6.60269	6.4048	6.42145	6.43052	-1.1323	-0.17925	1.1323	down	0.00275039	0.0454444
65010	SLC26A6	solute carrier family 26 (anion exchanger), member 6	7.18613	7.18045	7.17784	6.92554	7.05827	7.04284	-1.12708	-0.17259	1.12708	down	0.00274848	0.0454444
2067	ERCC1	excision repair cross-complementation group 1	9.74448	9.71273	9.80438	9.86216	9.83506	9.8864	1.07724	0.107343	1.07724	up	0.00275786	0.0455487
3609	ILF3	interleukin enhancer binding factor 3	10.0535	10.0697	10.1157	9.97213	9.96395	10.0095	-1.07013	-0.09779	1.07013	down	0.00275936	0.0455544
10587	TXNRD2	thioredoxin reductase 2	7.87888	7.90233	7.89961	8.02405	7.99351	8.05863	1.09565	0.13179	1.09565	up	0.00276096	0.0455617
2037	EPB41L2	erythrocyte membrane protein band 4.1-like 2	10.235	10.2169	10.186	10.3188	10.2737	10.3275	1.06737	0.0940667	1.06737	up	0.00276386	0.0455904
7168	TPM1	tropomyosin 1 (alpha)	5.42846	5.328	5.19057	5.49957	5.61242	5.62664	1.20069	0.263867	1.20069	up	0.00276967	0.0456162
54542	RC3H2	ring finger and CCCH-type domains 2	8.15871	8.21038	8.1816	8.27487	8.3069	8.36343	1.09543	0.131503	1.09543	up	0.00276982	0.0456162
140606	SELM	selenoprotein M	11.2516	11.2146	11.2293	11.2842	11.3139	11.3559	1.06157	0.0862	1.06157	up	0.00277156	0.0456218
3164	NR4A1	nuclear receptor subfamily 4 group A member 1	6.13091	6.13123	6.02757	5.91085	5.89804	5.85767	-1.15486	-0.207717	1.15486	down	0.00277496	0.0456585
64960	MRPS15	mitochondrial ribosomal protein S15	10.7895	10.8327	10.7841	10.6952	10.7148	10.7357	-1.06207	-0.08688	1.06207	down	0.00277633	0.045662
283209	PGM2L1	phosphoglucomutase 2-like 1	7.26098	7.27831	7.16067	7.0505	7.09598	7.04684	-1.12419	-0.16888	1.12419	down	0.00278093	0.0457186
25801	GCA	grancalcin	5.14089	5.28975	5.16482	5.00731	4.96102	4.82077	-1.20479	-0.268787	1.20479	down	0.00278427	0.0457544
7043	TGFB3	transforming growth factor beta 3	4.68598	4.47006	4.55992	4.81765	4.88519	4.83683	1.20963	0.27457	1.20963	up	0.00278975	0.0458061
22906	TRAK1	trafficking protein, kinesin binding 1	7.80906	7.81244	7.85894	7.94044	7.9599	7.979	1.09655	0.132967	1.09655	up	0.00279163	0.0458179
9444	QKI	QKI, KH domain containing, RNA binding	7.22966	7.19942	7.13551	7.33204	7.33165	7.37604	1.11603	0.15838	1.11603	up	0.00280241	0.0459309
90333	ZNF468	zinc finger protein 468	5.5992	5.51709	5.60366	5.73895	5.77702	5.9018	1.17496	0.232607	1.17496	up	0.00280235	0.0459309
25852	ARMC8	armadillo repeat containing 8	7.55849	7.70266	7.69436	7.79239	7.88405	7.78794	1.12476	0.169623	1.12476	up	0.00280748	0.0459723
5238	PGM3	phosphoglucomutase 3	9.38956	9.49875	9.52054	9.55821	9.5961	9.64549	1.09453	0.130317	1.09453	up	0.00280805	0.0459723
9409	PEX16	peroxisomal biogenesis factor 16	8.08714	8.05637	7.99277	7.83692	7.95879	7.88568	-1.11082	-0.15163	1.11082	down	0.00281806	0.0461164
54462	CCSER2	coiled-coil serine rich protein 2	8.34241	8.38955	8.33559	8.45354	8.46135	8.54935	1.09599	0.13223	1.09599	up	0.00281919	0.0461164
91782	CHMP7	charged multivesicular body protein 7	8.20747	8.09964	8.21316	7.97898	8.0841	7.99679	-1.11224	-0.153467	1.11224	down	0.00282824	0.0461487
23513	SCRIB	scribbled planar cell polarity protein	9.81218	9.79273	9.85236	9.74349	9.6998	9.71616	-1.07123	-0.0992733	1.07123	down	0.00282592	0.0461487
79647	AKIRIN1	akirin 1	9.53472	9.59559	9.53454	9.67054	9.63665	9.66461	1.0735	0.102317	1.0735	up	0.0028244	0.0461487
1983	EIF5	eukaryotic translation initiation factor 5	10.9036	10.9602	10.9177	10.9878	11.0086	11.0809	1.07072	0.0985833	1.07072	up	0.00282938	0.0461487
91607	SLFN11	schlafen family member 11	6.19061	6.16504	6.21215	5.98725	6.04173	5.93703	-1.14917	-0.200597	1.14917	down	0.00282388	0.0461487
412	STS	steroid sulfatase (microsomal), isozyme S	7.35398	7.2747	7.2287	7.45584	7.46276	7.42166	1.11803	0.16096	1.11803	up	0.00282789	0.0461487
80176	SPSB1	splA/ryanodine receptor domain and SOCS box containing 1	5.77746	5.71078	5.81759	5.52233	5.59644	5.52612	-1.16499	-0.220313	1.16499	down	0.00282763	0.0461487
6234	RPS28	ribosomal protein S28	7.33087	7.1645	7.21905	6.89862	7.09855	7.07588	-1.15973	-0.21379	1.15973	down	0.00283275	0.0461845
4690	NCK1	NCK adaptor protein 1	8.53049	8.56069	8.6266	8.66638	8.73191	8.70111	1.09218	0.127207	1.09218	up	0.00283451	0.0461941
23673	STX12	syntaxin 12	10.0171	10.0644	10.0417	10.1601	10.1206	10.122	1.06673	0.0931933	1.06673	up	0.002837	0.0462155
2250	FGF5	fibroblast growth factor 5	9.22269	9.27415	9.24922	9.31327	9.3694	9.39881	1.08058	0.111807	1.08058	up	0.00284876	0.0463572
1464	CSPG4	chondroitin sulfate proteoglycan 4	8.35495	8.38991	8.30533	8.17601	8.27527	8.17656	-1.1025	-0.140783	1.1025	down	0.00285564	0.0464055
57016	AKR1B10	aldo-keto reductase family 1, member B10 (aldose reductase)	5.7801	5.90612	5.82155	5.6086	5.62799	5.6224	-1.16172	-0.21626	1.16172	down	0.00285999	0.0464055
653319	KIAA0895L	KIAA0895-like	5.58666	5.54967	5.67768	5.32003	5.40273	5.3983	-1.17363	-0.230983	1.17363	down	0.00285839	0.0464055
441282	AKR1B15	aldo-keto reductase family 1, member B15	5.7801	5.90612	5.82155	5.6086	5.62799	5.6224	-1.16172	-0.21626	1.16172	down	0.00285999	0.0464055
22834	ZNF652	zinc finger protein 652	4.60973	4.60973	4.45471	4.81747	4.80103	4.84986	1.20141	0.26473	1.20141	up	0.0028578	0.0464055
10923	SUB1	SUB1 homolog, transcriptional regulator	8.53928	8.53706	8.6567	8.47153	8.38849	8.44553	-1.10381	-0.142497	1.10381	down	0.00286415	0.0464462
8942	KYNU	kynureninase	5.38543	5.62541	5.64538	5.18278	5.31536	5.31641	-1.21466	-0.280557	1.21466	down	0.00286963	0.0464722
25959	KANK2	KN motif and ankyrin repeat domains 2	10.5005	10.559	10.521	10.4009	10.4135	10.474	-1.06983	-0.0973767	1.06983	down	0.00287691	0.0465572
10299	MARCH6	membrane associated ring-CH-type finger 6	9.44374	9.41437	9.46688	9.54642	9.52784	9.54847	1.07121	0.0992467	1.07121	up	0.00288009	0.0465894
2512	FTL	ferritin, light polypeptide	13.83	13.8341	13.8161	13.7641	13.7754	13.7674	-1.04084	-0.0577467	1.04084	down	0.00288185	0.0465987
10902	BRD8	bromodomain containing 8	9.37893	9.39091	9.43364	9.30149	9.27458	9.31577	-1.07466	-0.10388	1.07466	down	0.00288685	0.0466605
10465	PPIH	peptidylprolyl isomerase H (cyclophilin H)	8.13507	8.15402	8.19455	8.02472	8.02491	8.05215	-1.09224	-0.127287	1.09224	down	0.00288811	0.0466617
1397	CRIP2	cysteine-rich protein 2	9.14608	9.12116	9.13999	8.96235	9.04669	9.05141	-1.08342	-0.115593	1.08342	down	0.0028908	0.0466859
11338	U2AF2	U2 small nuclear RNA auxiliary factor 2	9.1072	8.95627	8.98553	8.88476	8.8781	8.88076	-1.09819	-0.135127	1.09819	down	0.00289379	0.046707
1973	EIF4A1	eukaryotic translation initiation factor 4A1	12.8834	12.9107	12.8982	12.8221	12.7859	12.8592	-1.0534	-0.0750467	1.0534	down	0.00289566	0.046707
100533955	SENP3-EIF4A1	SENP3-EIF4A1 readthrough (NMD candidate)	12.8834	12.9107	12.8982	12.8221	12.7859	12.8592	-1.0534	-0.0750467	1.0534	down	0.00289566	0.046707
55013	CCDC109B	coiled-coil domain containing 109B	7.79604	7.76719	7.78872	7.63632	7.61664	7.68397	-1.10064	-0.13834	1.10064	down	0.00289506	0.046707
84552	PARD6G	par-6 family cell polarity regulator gamma	8.83534	8.80366	8.81091	8.65644	8.75583	8.66672	-1.08948	-0.12364	1.08948	down	0.00290362	0.0467992
4134	MAP4	microtubule associated protein 4	9.77999	9.89686	9.92388	9.93928	10.0109	10.0772	1.10361	0.14223	1.10361	up	0.00291859	0.047019
54981	NMRK1	nicotinamide riboside kinase 1	7.84232	7.96792	7.99626	7.76826	7.74679	7.81178	-1.1172	-0.15989	1.1172	down	0.00293208	0.0471783
2309	FOXO3	forkhead box O3	9.31543	9.34568	9.33701	9.40257	9.44468	9.45649	1.07317	0.101873	1.07317	up	0.00293587	0.0472007
2310	FOXO3B	forkhead box O3B pseudogene	9.31543	9.34568	9.33701	9.40257	9.44468	9.45649	1.07317	0.101873	1.07317	up	0.00293587	0.0472007
9750	FAM65B	family with sequence similarity 65 member B	5.28013	5.31526	5.35257	4.93865	5.17833	5.04292	-1.19971	-0.262687	1.19971	down	0.00293543	0.0472007
56937	PMEPA1	prostate transmembrane protein, androgen induced 1	7.24907	7.24251	7.23947	6.98667	7.15932	7.05407	-1.13053	-0.176997	1.13053	down	0.0029426	0.0472896
5591	PRKDC	protein kinase, DNA-activated, catalytic polypeptide	9.20399	9.25026	9.34346	9.13392	8.97913	9.17773	-1.12426	-0.168977	1.12426	down	0.00294596	0.0473126
55778	ZNF839	zinc finger protein 839	4.05314	4.44523	4.4905	4.65616	4.75298	4.67745	1.28869	0.365907	1.28869	up	0.00295429	0.0474193
389	RHOC	ras homolog family member C	10.9632	11.0258	10.9833	11.042	11.0886	11.1253	1.06771	0.0945133	1.06771	up	0.00295644	0.0474345
637	BID	BH3 interacting domain death agonist	8.891	8.93338	8.90904	8.98627	9.02479	9.05968	1.08106	0.11244	1.08106	up	0.0029589	0.0474546
8894	EIF2S2	eukaryotic translation initiation factor 2 subunit beta	10.8457	10.9003	10.9399	10.9676	10.9801	11.0465	1.07381	0.102743	1.07381	up	0.00296158	0.0474661
23603	CORO1C	coronin, actin binding protein, 1C	11.4895	11.5223	11.502	11.5535	11.5911	11.6053	1.05607	0.0787	1.05607	up	0.00296203	0.0474661
138151	NACC2	NACC family member 2, BEN and BTB (POZ) domain containing	5.789	5.73952	5.73134	5.91538	5.93974	6.05406	1.16186	0.21644	1.16186	up	0.00296485	0.0474919
4975	OMP	olfactory marker protein	5.77656	5.44101	5.56865	5.3377	5.28763	5.31155	-1.21682	-0.283113	1.21682	down	0.00297412	0.0475629
5303	PIN4	peptidylprolyl cis/trans isomerase, NIMA-interacting 4	6.35676	6.3509	6.34808	6.18563	6.16644	6.15342	-1.13557	-0.183417	1.13557	down	0.00297255	0.0475629
55920	RCC2	regulator of chromosome condensation 2	9.88545	9.91929	9.8868	9.77085	9.83596	9.79068	-1.0703	-0.0980167	1.0703	down	0.00297235	0.0475629
26259	FBXW8	F-box and WD repeat domain containing 8	8.44111	8.51427	8.47885	8.63224	8.58078	8.58646	1.08805	0.12175	1.08805	up	0.00297306	0.0475629
57181	SLC39A10	solute carrier family 39 (zinc transporter), member 10	5.88771	5.97727	5.90962	6.08187	6.1783	6.12906	1.15259	0.204877	1.15259	up	0.00298026	0.0476287
2115	ETV1	ets variant 1	5.06339	4.97921	5.11495	4.86511	4.79591	4.72561	-1.19497	-0.256973	1.19497	down	0.00298065	0.0476287
55238	SLC38A7	solute carrier family 38, member 7	8.35907	8.35177	8.39403	8.233	8.23713	8.27213	-1.08739	-0.12087	1.08739	down	0.00298569	0.0476899
23543	RBFOX2	RNA binding protein, fox-1 homolog (C. elegans) 2	8.78754	8.85944	8.8396	8.69551	8.66432	8.75475	-1.08975	-0.124	1.08975	down	0.00299108	0.0477373
10609	P3H4	prolyl 3-hydroxylase family member 4 (non-enzymatic)	7.67353	7.84438	7.79594	7.88927	7.95836	7.96236	1.12146	0.16538	1.12146	up	0.00299109	0.0477373
100526693	ARPC4-TTLL3	ARPC4-TTLL3 readthrough	4.71522	4.72566	4.75357	4.94403	5.00086	4.96875	1.18077	0.23973	1.18077	up	0.0029948	0.0477716
26140	TTLL3	tubulin tyrosine ligase like 3	4.71522	4.72566	4.75357	4.94403	5.00086	4.96875	1.18077	0.23973	1.18077	up	0.0029948	0.0477716
6015	RING1	ring finger protein 1	9.44355	9.41987	9.42126	9.29759	9.33359	9.35078	-1.07245	-0.100907	1.07245	down	0.00299567	0.0477716
84909	C9orf3	chromosome 9 open reading frame 3	7.38114	7.3478	7.38363	7.47322	7.50938	7.63272	1.12318	0.167583	1.12318	up	0.00300001	0.047802
80209	PROSER1	proline and serine rich 1	7.83507	7.81879	7.78486	7.73014	7.58671	7.65786	-1.11317	-0.15467	1.11317	down	0.00299963	0.047802
4212	MEIS2	Meis homeobox 2	6.79116	6.68619	6.71892	6.51864	6.57175	6.56544	-1.133	-0.180147	1.133	down	0.00300669	0.0478707
4925	NUCB2	nucleobindin 2	10.0215	10.0713	10.0718	10.1734	10.1159	10.166	1.06946	0.0968833	1.06946	up	0.00301572	0.0479874
51778	MYOZ2	myozenin 2	4.2967	4.17798	4.19367	4.42078	4.47792	4.78522	1.26446	0.338523	1.26446	up	0.0030186	0.0480011
1203	CLN5	ceroid-lipofuscinosis, neuronal 5	8.7003	8.6999	8.72709	8.8689	8.7837	8.82526	1.08437	0.116857	1.08437	up	0.00302166	0.0480303
90293	KLHL13	kelch like family member 13	6.91497	7.0003	7.08748	6.79058	6.86732	6.77061	-1.14188	-0.191413	1.14188	down	0.00302614	0.0480821
975	CD81	CD81 molecule	12.0186	12.0279	12.033	12.07	12.1085	12.1191	1.0517	0.07272	1.0517	up	0.0030405	0.0482323
5649	RELN	reelin	6.59314	6.52384	6.70674	6.71014	6.91028	6.87704	1.16844	0.22458	1.16844	up	0.00303841	0.0482323
91768	CABLES1	Cdk5 and Abl enzyme substrate 1	7.93817	7.95122	7.86932	7.66271	7.79728	7.81109	-1.11926	-0.162543	1.11926	down	0.00303962	0.0482323
23002	DAAM1	dishevelled associated activator of morphogenesis 1	6.57553	6.58638	6.51194	6.71059	6.72274	6.76765	1.12952	0.17571	1.12952	up	0.00304809	0.0483333
8773	SNAP23	synaptosome associated protein 23kDa	9.17636	9.16489	9.20569	9.28998	9.25587	9.31783	1.07593	0.10558	1.07593	up	0.00305188	0.0483739
6778	STAT6	signal transducer and activator of transcription 6, interleukin-4 induced	7.4491	7.51681	7.49419	7.25305	7.37531	7.34846	-1.11813	-0.161093	1.11813	down	0.00305408	0.0483893
659	BMPR2	bone morphogenetic protein receptor type II	10.2799	10.2691	10.2968	10.161	10.203	10.2125	-1.06422	-0.08979	1.06422	down	0.00306088	0.048419
92140	MTDH	metadherin	7.2317	7.29956	7.31025	7.3819	7.48343	7.455	1.11698	0.159607	1.11698	up	0.00305737	0.048419
222658	KCTD20	potassium channel tetramerization domain containing 20	6.68477	6.88111	6.88553	7.07031	6.98875	7.00785	1.15282	0.205167	1.15282	up	0.00306072	0.048419
5743	PTGS2	prostaglandin-endoperoxide synthase 2 (prostaglandin G/H synthase and cyclooxygenase)	4.12559	4.01835	4.2967	4.47432	4.35949	4.56052	1.24651	0.317897	1.24651	up	0.00306665	0.0484908
197131	UBR1	ubiquitin protein ligase E3 component n-recognin 1	6.08616	6.07593	6.08616	6.26913	6.27419	6.26067	1.13701	0.185247	1.13701	up	0.00306915	0.0485108
5999	RGS4	regulator of G-protein signaling 4	8.88296	8.99046	8.99441	9.04691	9.10013	9.10001	1.09157	0.126407	1.09157	up	0.00307232	0.0485134
811	CALR	calreticulin	8.56197	8.60828	8.59643	8.63587	8.80253	8.76545	1.10629	0.145723	1.10629	up	0.00307301	0.0485134
26261	FBXO24	F-box protein 24	5.04979	5.12062	5.04741	4.79958	4.76696	4.90475	-1.18825	-0.248843	1.18825	down	0.00308014	0.0485869
3184	HNRNPD	heterogeneous nuclear ribonucleoprotein D	8.10607	8.15872	8.13353	8.05053	7.8918	7.99908	-1.11134	-0.152303	1.11134	down	0.00310119	0.0488798
59338	PLEKHA1	pleckstrin homology domain containing A1	8.44018	8.47243	8.4541	8.5356	8.57009	8.63358	1.08989	0.124187	1.08989	up	0.00311625	0.0490845
80349	WDR61	WD repeat domain 61	4.27338	4.10239	4.36564	4.7385	4.52484	4.46554	1.25628	0.329157	1.25628	up	0.00312236	0.0491151
102724770	LOC102724770	protein DGCR6	8.56455	8.55093	8.52618	8.36577	8.46262	8.43666	-1.09091	-0.125537	1.09091	down	0.0031211	0.0491151
8214	DGCR6	DiGeorge syndrome critical region gene 6	8.56455	8.55093	8.52618	8.36577	8.46262	8.43666	-1.09091	-0.125537	1.09091	down	0.0031211	0.0491151
56983	POGLUT1	protein O-glucosyltransferase 1	7.38857	7.34665	7.4781	7.57452	7.5146	7.62144	1.12175	0.165747	1.12175	up	0.00312182	0.0491151
85359	DGCR6L	DiGeorge syndrome critical region gene 6-like	8.56455	8.55093	8.52618	8.36577	8.46262	8.43666	-1.09091	-0.125537	1.09091	down	0.0031211	0.0491151
1660	DHX9	DEAH (Asp-Glu-Ala-His) box helicase 9	9.35901	9.34218	9.34851	9.22894	9.26116	9.26336	-1.07084	-0.0987467	1.07084	down	0.00312662	0.0491428
84450	ZNF512	zinc finger protein 512	9.32259	9.33735	9.28782	9.20337	9.18657	9.24243	-1.07559	-0.10513	1.07559	down	0.00312865	0.049155
118421	LINC00161	long intergenic non-protein coding RNA 161	5.14279	5.17616	5.13039	4.9943	4.81162	4.8927	-1.1894	-0.25024	1.1894	down	0.00313366	0.0491557
203260	CCDC107	coiled-coil domain containing 107	8.26893	8.21204	8.25247	8.32019	8.38486	8.42576	1.09616	0.132457	1.09616	up	0.00313445	0.0491557
150365	MEI1	meiotic double-stranded break formation protein 1	6.50046	6.38766	6.55606	6.29307	6.25548	6.29386	-1.14917	-0.20059	1.14917	down	0.00313494	0.0491557
9341	VAMP3	vesicle associated membrane protein 3	9.24692	9.24965	9.29277	9.10883	9.12801	9.2058	-1.0834	-0.115567	1.0834	down	0.00313151	0.0491557
51450	PRRX2	paired related homeobox 2	8.4518	8.52246	8.46481	8.35372	8.38784	8.32323	-1.09033	-0.12476	1.09033	down	0.00313724	0.0491722
25949	SYF2	SYF2 pre-mRNA-splicing factor	9.40215	9.40939	9.46191	9.29503	9.28153	9.36248	-1.08033	-0.11147	1.08033	down	0.00314126	0.0492088
127687	C1orf122	chromosome 1 open reading frame 122	10.4573	10.4672	10.4803	10.5162	10.5708	10.5912	1.06516	0.0910733	1.06516	up	0.00314208	0.0492088
26071	FAM127B	family with sequence similarity 127 member B	10.2758	10.2689	10.2745	10.2092	10.1887	10.1582	-1.06271	-0.0877467	1.06271	down	0.00314597	0.0492501
84074	QRICH2	glutamine rich 2	5.2993	5.10173	5.02887	4.77258	4.92798	4.86822	-1.22013	-0.28704	1.22013	down	0.00314791	0.0492609
56951	C5orf15	chromosome 5 open reading frame 15	9.28044	9.26647	9.21386	9.33523	9.36036	9.38422	1.0765	0.106347	1.0765	up	0.00315831	0.049404
4676	NAP1L4	nucleosome assembly protein 1-like 4	9.74757	9.86147	9.87138	9.71585	9.65337	9.73676	-1.09037	-0.124813	1.09037	down	0.00315998	0.0494105
100128731	OST4	oligosaccharyltransferase complex subunit 4 (non-catalytic)	12.2422	12.2905	12.2538	12.3188	12.3393	12.3429	1.05081	0.0715067	1.05081	up	0.00316568	0.0494602
132946	ARL9	ADP-ribosylation factor like GTPase 9	5.47931	5.44037	5.16412	5.09276	5.03172	5.08857	-1.22285	-0.29025	1.22285	down	0.00317063	0.0495011
112770	GLMP	glycosylated lysosomal membrane protein	9.98584	10.0003	10.0007	9.88552	9.9278	9.90368	-1.06433	-0.08995	1.06433	down	0.00317371	0.0495071
84888	SPPL2A	signal peptide peptidase like 2A	9.80787	9.81135	9.813	9.89013	9.88527	9.93425	1.0662	0.0924767	1.0662	up	0.00317297	0.0495071
7422	VEGFA	vascular endothelial growth factor A	6.98992	6.94403	6.98015	6.76128	6.86161	6.78404	-1.12432	-0.169057	1.12432	down	0.00319456	0.0497342
55218	EXD2	exonuclease 3'-5' domain containing 2	6.43497	6.37721	6.54907	6.28291	6.27781	6.15566	-1.16067	-0.214957	1.16067	down	0.00320518	0.0498399
9665	KIAA0430	KIAA0430	9.05019	9.04316	9.08851	8.89539	8.95711	8.9843	-1.08299	-0.11502	1.08299	down	0.00321025	0.04984
50805	IRX4	iroquois homeobox 4	5.15867	4.84557	4.94603	4.66934	4.75589	4.62655	-1.23071	-0.299497	1.23071	down	0.00320908	0.04984
58504	ARHGAP22	Rho GTPase activating protein 22	8.37921	8.44139	8.41224	8.19821	8.3323	8.28402	-1.10147	-0.139437	1.10147	down	0.00320971	0.04984
140739	UBE2F	ubiquitin conjugating enzyme E2F (putative)	8.93589	8.99334	8.92568	9.03676	9.05698	9.10332	1.08226	0.11405	1.08226	up	0.00320961	0.04984
8553	BHLHE40	basic helix-loop-helix family member e40	6.76699	6.77834	6.71712	6.58601	6.47792	6.63154	-1.13997	-0.188993	1.13997	down	0.00321736	0.0498912
