# Supplementary material for: HYAL1 Is Downregulated in Idiopathic Pulmonary Fibrosis and Inhibits HFL-1 Fibroblast Proliferation When Upregulated
Source: Biomed Res Int. 2020 Mar 11;2020:3659451. doi: 10.1155/2020/3659451 (PMC7086424; doi:10.1155/2020/3659451)
Supplement: Supplementary 2 — Table S2: gene lists and corresponding parameters in three analyses. [file 3659451.f2.xlsx]

## Sheet: Sheet1
Differently altered genes (FDR<0.05)			Significantly altered genes (SVM weight > 0.1)			Signature genes (Absolute loading coefficient > 0.95)
Gene name	FDR		Gene name	Weight		Gene name	Loading coefficient
HYAL1	1.6989e-12		HYAL1	1.48413		PIN4	-0.997
RAP1A	1.25254e-10		RAP1A	0.632176		LPAR3	-0.996
RAD23B	2.86605e-08		HSPD1	0.515944		NPC2	-0.996
IGFBP3	2.34218e-07		RHCE	0.412266		PDIA4	-0.995
CEMIP	3.4867e-07		RHD	0.412266		TMEM119	-0.993
SRGN	1.0895e-06		DACH1	0.401037		GNG2	-0.992
CLDN1	1.19459e-06		GPNMB	0.387942		NR4A2	-0.99
CCND2	2.06563e-06		RAD23B	0.378183		KHDRBS1	-0.989
CRIM1	2.34975e-06		CORIN	0.365317		RBBP4	-0.989
P3H2	2.65345e-06		HBD	0.358818		TWIST1	-0.987
NRXN3	3.94425e-06		HBD	0.358818		CASP6	-0.985
SERPINE1	3.99951e-06		MSI2	0.344391		SLC22A12	-0.983
LRRN3	4.29667e-06		SNORA84	0.333044		TNNT3	-0.983
COL1A1	5.2822e-06		ZNF609	0.314036		TUBB3	-0.981
OLR1	8.6997e-06		GALNT15	0.300396		DACH1	-0.981
GPRC5A	8.6997e-06		NRXN3	0.300029		PBX1	-0.98
PDIA4	9.98388e-06		AUTS2	0.299547		SOX4	-0.979
MAMDC2	9.98388e-06		SRGN	0.286813		SPP1	-0.979
ASNS	1.11954e-05		ABCC9	0.284063		UTY	-0.978
CCL2	1.44097e-05		ZKSCAN8	0.280644		MLF1	-0.976
FLRT3	1.44097e-05		PHF14	0.272172		CSNK1G2	-0.976
CORIN	1.46309e-05		PTPRQ	0.271115		MAT2A	-0.976
SOX4	1.51257e-05		CCDC80	0.270161		RRS1	-0.976
CCBE1	1.51257e-05		ATF3	0.269719		TRIM45	-0.975
CCDC80	1.59978e-05		CAST	0.269347		TWIST2	-0.975
LOX	1.63178e-05		NR4A2	0.268268		CPLX2	-0.975
USP53	1.87693e-05		P3H2	0.268087		TRAM1L1	-0.974
CPED1	1.99431e-05		DPY19L2	0.265472		ZC4H2	-0.973
MTHFD2	2.10047e-05		PBX1	0.264347		C14orf93	-0.972
DAB2	2.16578e-05		GPRC5A	0.264034		IFIT1	-0.971
LOXL2	2.21936e-05		PTPRG	0.263349		SIX1	-0.97
TUBB3	2.25118e-05		GSG1	0.260853		PPP3R1	-0.97
MASP1	2.39767e-05		FLT1	0.258803		GJA3	-0.97
CTGF	2.49179e-05		ARRDC4	0.258722		RNASE4	-0.969
GPNMB	2.81153e-05		ZNF711	0.257367		TCF4	-0.969
MAP3K7CL	3.36717e-05		IGFBP3	0.254969		TBRG1	-0.968
UGCG	3.36717e-05		ZNF839	0.253653		GPC6	-0.968
SERPINB7	3.3684e-05		SERPINB2	0.252918		GPNMB	-0.968
PRICKLE1	3.54053e-05		NUMB	0.252713		POSTN	-0.968
COL11A1	3.75238e-05		PDXDC1	0.252672		SSX2IP	-0.968
PSG3	3.87138e-05		SYNPO2	0.251575		SNCAIP	-0.967
OPN3	3.87138e-05		SP140L	0.250497		TBX3	-0.967
PSG5	3.87138e-05		GRPR	0.247342		RFX8	-0.966
MGARP	3.96681e-05		GATA6	0.24679		FARS2	-0.965
PLCB4	3.97701e-05		EDN1	0.246574		AQP10	-0.965
TNFRSF10D	4.43045e-05		MYPN	0.244959		IDH1	-0.965
BDNF	4.68513e-05		NETO1	0.243119		TGIF1	-0.965
NPR3	4.73011e-05		MAMDC2	0.240509		EPHB2	-0.963
GLIPR1	5.33874e-05		PKIB	0.239995		KLHL7	-0.963
ARRDC4	5.53208e-05		TRIM7	0.238196		SPR	-0.962
FGF2	5.72427e-05		ELN	0.237161		HOXB6	-0.961
GNG2	5.72427e-05		SRSF3	0.236883		TRIM24	-0.961
DACH1	5.84865e-05		ECSCR	0.235812		GNPDA1	-0.961
STOM	5.84865e-05		ASNS	0.235187		MCM7	-0.961
TMEM45A	5.85099e-05		NGF	0.234988		GRN	-0.961
GSG1	6.0183e-05		ECHDC2	0.23438		FAM60A	-0.96
SYNPO2	6.24916e-05		ATG16L2	0.234359		CRMP1	-0.958
ATP2B4	6.38679e-05		IL7R	0.234215		HLA-DPB1	-0.957
OXTR	6.44848e-05		PTBP3	0.233601		PTBP2	-0.957
COL8A1	6.52678e-05		GFRA1	0.232428		SPATA6	-0.957
RGS5	6.57172e-05		CCND2	0.230867		LINC01119	-0.957
NTM	6.58538e-05		EGR3	0.228789		FOXL1	-0.957
TMEM35	6.95085e-05		CLDN1	0.227084		ZNF608	-0.957
GFRA1	7.15947e-05		MYOZ2	0.226739		GLOD4	-0.956
NGF	7.24769e-05		DBF4	0.225577		PHLDA1	-0.956
PHLDA1	7.8812e-05		PKP4	0.224791		NR4A1	-0.955
ZFP36L2	7.96829e-05		FSTL3	0.224713		UBA7	-0.955
PRSS23	8.41592e-05		SRRM3	0.223573		FAM162B	-0.955
NEXN	8.5751e-05		JADE1	0.223371		ZBP1	-0.955
NPC2	8.60485e-05		SETBP1	0.221654		SLC50A1	-0.954
PVR	9.43921e-05		OXTR	0.221378		SCD	-0.954
SERPINB2	9.70953e-05		PDGFD	0.220306		CCNI	-0.953
ELN	0.000109025		CD274	0.220006		CCL7	-0.953
KRTAP1-5	0.000109236		PPP1R1C	0.219933		EGR3	-0.953
STC2	0.00011198		NEGR1	0.219651		SOX12	-0.953
CYR61	0.000112629		SCN3A	0.219451		AADAT	-0.953
NID2	0.000127544		RNF144B	0.219141		ZFP36L2	-0.952
KCTD4	0.000133799		TNFRSF10C	0.218913		FAM180A	-0.952
GREM1	0.000134172		WDR61	0.218826		SLFN11	-0.952
KCNJ2	0.000136608		OLR1	0.21827		TCF3	-0.951
GAS6	0.00013906		FLRT3	0.217168		NUMB	-0.951
PHLDB2	0.00013906		LOC100289511	0.21649		TRIM14	-0.951
TNFRSF11B	0.000142374		ADAMTS5	0.215845		GEM	-0.951
CNN1	0.000144067		SETDB2	0.215458		GLUL	-0.951
ATF3	0.00014445		PSAT1	0.215287		RUNX1T1	-0.951
F3	0.000162955		TMEM130	0.214573		FMNL2	-0.951
PDCD1LG2	0.000168636		RAPGEF2	0.214086		ADH1C	-0.95
KHDRBS1	0.000176102		BIRC3	0.212513		ADH1B	-0.95
IGFBP2	0.000177632		ITGA1	0.212507		ADH1A	-0.95
MEST	0.000177632		TGM2	0.212494		GPC2	-0.95
PAPSS2	0.000185375		IGFBP2	0.212407		SLC9A7	0.95
SLC16A4	0.000193728		LEF1	0.211225		IL11	0.95
LRRN4CL	0.000193728		TOR1A	0.210211		NXPE3	0.95
RRS1	0.000193728		CLDN23	0.208709		DDIT3	0.95
FAM177A1	0.000197882		PAPPA	0.207423		ARSK	0.95
TMEM47	0.000197882		PHLDB2	0.207144		FGD4	0.95
TXNIP	0.000200667		MTHFD2	0.206399		MAP1B	0.951
GALNT15	0.00020772		NF1	0.206303		COPZ2	0.951
HOXB6	0.000214358		RGS5	0.205952		SEMA3D	0.951
NNMT	0.000216541		PTGS2	0.205597		OSTM1	0.951
PLOD2	0.000221685		ZNF74	0.205234		ETHE1	0.952
FTH1	0.000244364		PDCD1LG2	0.204904		SULF1	0.952
COL3A1	0.000249651		PABPC5	0.204862		WNT5B	0.952
ID1	0.000255733		SNORA30	0.204602		NTN4	0.952
IKBIP	0.000259081		NR3C2	0.204421		SNAPC1	0.953
FOXL1	0.000261729		TNFSF18	0.204174		TNFRSF10C	0.953
PPP1R3C	0.000266511		FAR2	0.204149		DICER1	0.953
PSG1	0.000279454		KCTD4	0.203795		SNTB1	0.954
PSG8	0.000279454		SLC9A7	0.203142		MPHOSPH8	0.954
GRAMD3	0.000295333		MAP3K7CL	0.200781		THBS1	0.954
SPARC	0.000302801		TMEM217	0.200133		NR3C2	0.955
PHGDH	0.000307986		PCNX	0.199939		PRPS1	0.955
CD55	0.000310546		XIRP2	0.198674		SYNPO2	0.955
RAMP1	0.000318831		IL20RB	0.198364		PPARA	0.955
FSTL1	0.000332712		USP53	0.19768		NEGR1	0.955
EPG5	0.000338245		IRX4	0.197152		ACADSB	0.955
RNF144B	0.000338448		KBTBD8	0.196956		ENPP1	0.956
NR4A2	0.000345284		ATP10D	0.19682		MTMR10	0.956
NEGR1	0.000356053		NOG	0.196702		HSPB2-C11orf52	0.956
MAT2A	0.000392914		SLC38A4	0.196652		C11orf52	0.956
MRPL33	0.000404076		GPC2	0.196581		GNG12	0.956
IGFBP5	0.000404076		CYTL1	0.196411		PPP1R1C	0.957
FMNL2	0.000405488		DHRS3	0.195942		FGF1	0.957
TXN	0.000405488		SPANXD	0.195189		AFF4	0.957
ALPK2	0.000418484		SPANXC	0.195189		FKBP14	0.957
BMPER	0.00042039		PSG3	0.194954		IL6	0.957
NUMB	0.000423168		PSG5	0.194954		NFAT5	0.957
DNAJB9	0.000423931		CEMIP	0.194784		F2RL2	0.957
GCNT2	0.000427318		PRKCB	0.194548		TTC3	0.958
IGFBP4	0.000436198		C10orf54	0.194246		LMCD1	0.958
RCAN1	0.000439549		FGF1	0.194144		LIFR	0.958
FAM162B	0.000440286		ARL9	0.193779		SLC8A1	0.958
MAP1A	0.000445512		SOX4	0.193769		KLHDC1	0.958
GRPR	0.000453586		SEMA3C	0.193587		FAM107B	0.959
TBC1D19	0.000457847		SHMT1	0.193489		GAL	0.959
DIAPH3	0.000457847		MYOCD	0.193307		BIRC6	0.959
SMIM13	0.000486479		MME	0.192821		CCDC81	0.959
RDH10	0.00049975		DDX52	0.191829		KRTAP2-3	0.959
PSAT1	0.000516286		MASP1	0.191357		MRS2	0.96
SMURF2	0.000521364		CCL2	0.191189		CALU	0.96
LMOD1	0.000522103		LIFR	0.190803		RASAL2	0.96
PBX1	0.000525854		SETD6	0.190252		ECSCR	0.96
PLAUR	0.000560707		DIAPH3	0.189768		TMEM47	0.96
IL7R	0.000564911		AURKC	0.189739		PELO	0.96
PELO	0.000566788		C8orf34	0.189716		WDR66	0.96
ITGA1	0.000570285		PEX1	0.189547		ELN	0.96
ITGA7	0.000572489		OMP	0.189132		C14orf28	0.96
JUN	0.000592511		IGFBP5	0.189029		CADM1	0.961
DDIT4	0.000603484		ZAK	0.188918		OGFRL1	0.962
SCN3A	0.000641277		KCNJ2	0.188706		TCEANC2	0.962
PLEC	0.000688451		NPR3	0.188186		LMOD1	0.962
FRY	0.000704525		LOC100129518	0.188174		PHGDH	0.963
ZFAND5	0.000738288		SOD2	0.188174		GALNT2	0.963
CCNI	0.000742308		SERPINB7	0.188024		PSG8	0.963
SLC7A1	0.000758682		MMP19	0.187764		PSG1	0.963
SLC9A7	0.000773094		NOV	0.187436		PCNX	0.963
GADD45A	0.000773918		COL11A1	0.187333		PLPPR4	0.963
MAP4K4	0.000773918		QRICH2	0.187102		ABAT	0.963
IDH1	0.000778302		SLC16A7	0.186563		ALPK2	0.963
SIX1	0.000778302		SLITRK5	0.186305		FN1	0.963
CSNK1G2	0.000794695		FLYWCH1	0.186293		ARHGAP6	0.963
CALU	0.000794695		SULF1	0.185662		NPHP3-ACAD11	0.964
MARCKSL1	0.000807088		KLF5	0.185381		ACAD11	0.964
HAS2	0.000809122		KYNU	0.185329		AP2B1	0.964
PLOD1	0.000811941		LPAR3	0.185205		IGFBP2	0.965
MPHOSPH8	0.000874367		PLCB4	0.185112		PLAUR	0.965
ADGRL4	0.0009145		LOX	0.184909		TMEM52B	0.966
SNAPC1	0.0009145		HMBOX1	0.184513		KIT	0.966
HAGH	0.000939174		LILRA2	0.184193		IRS2	0.966
SUCO	0.000939174		TMPO	0.183818		SH2D4A	0.966
PGPEP1	0.000947311		C15orf48	0.18357		PCSK5	0.966
ATP8B1	0.000947311		ID4	0.183555		ATP1B1	0.966
CITED2	0.000961911		SCG5	0.183156		CDA	0.966
COL4A2	0.00098978		NTM	0.182647		SLC16A4	0.966
CD109	0.000992815		KRTAP5-8	0.182488		STXBP6	0.966
PKP4	0.000992815		CCL7	0.182435		ITGA1	0.967
DUSP1	0.000992815		PGPEP1	0.182267		ZFAND5	0.967
TMEM237	0.000994974		PVR	0.182252		CNST	0.967
LMCD1	0.0010014		COL8A1	0.182174		IGFBP5	0.967
HLA-C	0.00103625		OGFRL1	0.181906		COLGALT2	0.967
FGF1	0.00103775		ARL4A	0.181282		CNN1	0.967
TMED3	0.00103948		MPP4	0.180783		ATF3	0.967
SLC20A2	0.00104707		TIPARP	0.180583		DUSP1	0.967
FN1	0.00106566		FAM180A	0.179849		PPP1R12B	0.968
CAST	0.00107639		BORCS8	0.179365		TMEM130	0.968
SNAI2	0.00107868		NEDD9	0.179333		SCN3A	0.968
SLC35G2	0.00109541		PLAUR	0.179212		COL4A1	0.968
ACTA2	0.00111591		OLFML2B	0.178836		RAMP1	0.968
TCF4	0.00111976		FAM162B	0.178703		CTGF	0.968
LOC100129518	0.00113339		SPATA6	0.178051		CLMP	0.968
SOD2	0.00113339		PC	0.17778		CAST	0.968
PHTF2	0.00113647		MUM1	0.176978		RCAN1	0.969
CADM1	0.00115367		CRIM1	0.176908		DIAPH3	0.969
SMAD1	0.00119018		INMT	0.176741		GLIPR1	0.969
MRVI1	0.00119018		NDNF	0.176711		TNFRSF11B	0.969
BIRC6	0.00119018		SMAD1	0.176566		OXTR	0.969
TCF3	0.00119238		SLC35G2	0.176539		SRSF10	0.97
GRN	0.0011985		NIPA1	0.176135		C8orf34	0.97
FOXD1	0.00121981		INA	0.175703		FBXL17	0.97
SRSF10	0.00122746		PRICKLE1	0.175634		GRPR	0.97
ADAMTS5	0.00123169		RFX8	0.175544		COL11A1	0.97
TCF12	0.00123391		ADH1C	0.175245		ITGA7	0.971
MYEF2	0.00127372		ADH1A	0.175245		NOL6	0.971
NOG	0.00127536		ADH1B	0.175245		TXNDC15	0.971
PRPS1	0.00127558		LMCD1	0.17464		GALNT15	0.971
EGR3	0.00127812		CASP1	0.174585		GOLGA1	0.971
PGRMC2	0.0012925		ZFAND5	0.174433		TXNIP	0.971
PTBP3	0.0012925		MALT1	0.174385		COL5A1	0.971
F2RL2	0.0012925		HIST1H4E	0.173643		BMPER	0.971
GLUL	0.00129374		KRTAP20-2	0.172529		PKD2	0.972
KLF5	0.00129465		LIMS2	0.172053		VCAM1	0.972
C10orf54	0.00129465		BDNF	0.171849		YPEL2	0.972
MYOCD	0.00130279		KCNE4	0.171746		MAP1A	0.972
GDF15	0.00131323		BIRC6	0.171477		SRSF8	0.973
HSPE1-MOB4	0.00133588		PHLDA1	0.17138		SHMT2	0.973
THBS1	0.00133588		TMEM52B	0.171313		EPG5	0.973
HSPE1	0.00133588		LGALS9C	0.170793		FSTL1	0.973
KCNMA1	0.00133996		LGALS9B	0.170793		UTP14C	0.973
COL5A1	0.00134394		GCNT2	0.170627		ALG11	0.973
TMCO3	0.00134806		NDRG4	0.170464		PAPSS2	0.973
COPZ2	0.00134806		PNISR	0.170214		MYOCD	0.973
PHYH	0.00134806		GOLGA1	0.169627		MRPL33	0.973
TXNDC15	0.00139177		PTBP2	0.169182		COL8A1	0.973
RNASE4	0.00140185		ULK3	0.169151		HMBOX1	0.973
GNG12	0.00140185		TPM1	0.168912		COL3A1	0.975
ARSK	0.00142429		SEMA3D	0.168688		MAP4K4	0.975
BRI3	0.00144787		LRRN3	0.168437		RNF144B	0.975
GPC6	0.00147082		PSG1	0.168013		PDE4DIP	0.975
CLMP	0.00147811		PSG8	0.168013		LOC653513	0.975
PDXDC1	0.001514		FBXO4	0.167684		SLC7A1	0.975
S100A10	0.0015434		RIMS1	0.1675		KCNK2	0.975
CKAP4	0.0015434		ATP8A2	0.16747		PRSS23	0.976
GALNT2	0.00154385		HERC6	0.167429		PTGER4	0.976
SHMT2	0.00155292		GCA	0.167343		CCDC80	0.976
KIT	0.00155292		FGF2	0.167185		TRMT2B	0.976
SNHG12	0.00157166		OR51E2	0.167046		ARRDC4	0.977
SLC8A1	0.001583		TGFB3	0.166754		SLIT2	0.977
VCAN	0.00165533		CDKN1C	0.166649		SUCO	0.977
ID2	0.00165533		SHC4	0.166209		HAGH	0.977
TRIM14	0.00165533		GABRB1	0.165932		STOM	0.977
KLF10	0.00170209		ICAM1	0.165841		IKBIP	0.978
SRPX2	0.00170997		SLC16A4	0.165633		CHST2	0.978
NOV	0.00172695		HTR2B	0.165503		KRTAP1-5	0.979
LGALS3	0.00173106		AADAT	0.165496		TBC1D19	0.979
KCNK2	0.00175469		SALL1	0.165198		PLOD2	0.979
LOXL1	0.00178034		SNAPC1	0.165079		NGF	0.979
NQO1	0.00181069		TAOK1	0.165018		PPP1R3C	0.98
UAP1	0.00183348		GEMIN4	0.164379		SEC14L1	0.98
SLC7A5	0.00184464		FAM65B	0.164326		TNFRSF10D	0.98
CTSA	0.00189086		MEX3B	0.164191		MTHFD2	0.98
GLTSCR2	0.00189875		SLC20A2	0.164151		BDNF	0.98
CALD1	0.00190506		EYA4	0.163957		MAP3K7CL	0.98
FIBIN	0.00190506		DHFR	0.163607		TNFSF18	0.98
COL4A1	0.00193665		FBXL17	0.163018		PGPEP1	0.981
NDFIP2	0.00194044		CPED1	0.162998		PRICKLE1	0.981
NETO1	0.00194663		SPP1	0.1629		RBKS	0.981
PCNX	0.00198169		SERPINE1	0.162588		TMEM35	0.981
FBXL17	0.00201928		FMNL2	0.161798		LGR4	0.982
WNT5A	0.002057		TRAM1L1	0.161695		SERPINB7	0.982
VCAM1	0.00212572		ENPP1	0.16155		TMEM2	0.982
FBN1	0.00213189		GK	0.16147		ASNS	0.983
TPD52L1	0.00213457		ID1	0.161311		FGF2	0.983
LAMC1	0.00213459		ANGPT1	0.161081		ZNF800	0.983
SLIT2	0.00214464		COL1A1	0.160939		MRVI1	0.983
TBX3	0.00214516		SEMA5A	0.160779		DNAJB9	0.983
PTPRG	0.00214516		RAMP1	0.160759		GAS6	0.983
MDK	0.00214516		SLC35A3	0.160741		LRRN4CL	0.983
LTBP1	0.00215841		APEX2	0.160702		GCNT2	0.984
GATA6	0.00218227		GEM	0.160341		RANBP17	0.984
B4GALT4	0.00221306		SRSF10	0.16005		LOX	0.984
DUSP5	0.00222633		CLGN	0.159745		SNHG12	0.984
TWSG1	0.00224365		SLC37A4	0.15966		KCNJ2	0.985
SERPINI1	0.00224365		MYEF2	0.159523		P3H2	0.985
TRAM1L1	0.00224365		FIBIN	0.159161		PDXDC1	0.985
P2RX5	0.00227411		KLF10	0.158741		AASS	0.985
PSPC1	0.00230118		BMPER	0.158467		MEST	0.985
IMPDH2	0.00231124		AQP11	0.158382		NEXN	0.985
PTMA	0.00231701		ZNF436-AS1	0.158315		FAM198B	0.985
LOC728026	0.00231701		CNN1	0.158205		NPR3	0.986
LMO7	0.00238668		FAM65C	0.1579		PVR	0.986
SPR	0.00238668		GNL1	0.157776		CPED1	0.986
MAN1A2	0.00238884		PHC1	0.157146		MGARP	0.987
SUSD1	0.00239425		HIST1H2AD	0.157084		CCL2	0.987
KRTAP2-3	0.00239425		HIST1H3D	0.157084		PSG5	0.987
WRB	0.00239425		TNFRSF25	0.157072		PSG3	0.987
C3orf14	0.00243355		CPLX2	0.157003		GRAMD3	0.987
ITGAE	0.00243712		MAT2A	0.15693		NNMT	0.987
TWIST2	0.00243712		GDF15	0.156616		SMIM13	0.987
NR3C2	0.00246846		HSPB2-C11orf52	0.156567		SLC16A7	0.988
TMEM217	0.0024912		C11orf52	0.156567		FRY	0.988
PLPPR4	0.00257999		SIX1	0.156551		TMEM45A	0.988
IRS2	0.00260954		ZNF652	0.156447		SLC7A5	0.988
CDKN1A	0.00261062		SPINT1	0.156381		RGS5	0.989
AOX1	0.00261587		LRRN4CL	0.155521		TTLL3	0.99
GLT8D2	0.00261686		COLGALT2	0.155355		ARPC4-TTLL3	0.99
XBP1	0.00262031		COMTD1	0.155338		PLCB4	0.99
ETHE1	0.00262364		PHGDH	0.15478		GSG1	0.99
ACTG2	0.0026313		EZH2	0.15477		NID2	0.99
PMAIP1	0.00263502		SLCO2B1	0.154681		CCBE1	0.99
THY1	0.00264146		PARP14	0.154444		F3	0.99
IFITM1	0.00264452		PCDH7	0.154375		SUSD1	0.991
KCNE4	0.00267982		LMOD1	0.154221		CORIN	0.991
PNISR	0.0026998		LMBR1	0.154181		OLR1	0.991
IRF9	0.00274456		ADAM23	0.154001		CEMIP	0.992
GNPDA1	0.00277266		OPN3	0.153983		MASP1	0.992
PAMR1	0.002798		TMEM136	0.153952		MAMDC2	0.992
POSTN	0.00285524		ALAD	0.153936		TMEM237	0.992
GAL3ST4	0.00285524		ETV1	0.153736		KCTD4	0.992
BTG1	0.00285524		GNG2	0.153716		NRXN3	0.992
AP2B1	0.002873		SLC7A1	0.153549		UGCG	0.993
IL12A	0.00289862		PDIA4	0.153467		FAM177A1	0.993
PEPD	0.00292161		THBS1	0.153375		COL1A1	0.993
COLGALT2	0.00292161		CD55	0.153333		ADGRL4	0.993
WNT5B	0.00292161		BTN3A2	0.153281		DDIT4	0.993
OGFRL1	0.00292268		EEA1	0.153261		SERPINE1	0.993
ENPP1	0.00292656		ANKRD34A	0.153142		STC2	0.994
TMEM119	0.00292656		PRSS38	0.152942		ATP2B4	0.994
MEGF9	0.00293387		EXOSC7	0.152542		FLRT3	0.994
TMEM130	0.00293387		CLEC3B	0.152542		GPRC5A	0.994
EXOSC7	0.00294642		FABP4	0.152518		CCND2	0.995
CLEC3B	0.00294642		RUNX2	0.152486		PHLDB2	0.995
LATS2	0.0029622		CSNK1A1	0.152357		UBR1	0.995
SOX12	0.00297201		GLIPR1	0.152145		USP53	0.995
AADAT	0.00299163		RELN	0.152127		CD55	0.995
MSI2	0.0030454		FOXP1	0.152105		CRIM1	0.995
GLOD4	0.00306349		HAS2	0.152098		LRRN3	0.996
COMTD1	0.00306731		RNF170	0.152041		MYEF2	0.996
PTGER4	0.00312386		PMPCB	0.15204		HYAL1	0.996
JADE1	0.00312386		C14orf93	0.151783		CLDN1	0.996
CLN3	0.00313145		P2RX5	0.151614		RAP1A	0.996
CARD16	0.00313145		ZFP36L2	0.151245		OPN3	0.996
ARMCX1	0.0031359		FLVCR2	0.151093		LOXL2	0.997
TRAK2	0.00313612		MLF1	0.151075		NTM	0.997
FAM198B	0.00314667		MGARP	0.150755		SRGN	0.998
ANXA5	0.00318105		CCBE1	0.150631		RDH10	0.998
TTC3	0.00318669		CCHCR1	0.150412		DAB2	0.998
LMNA	0.00321482		TNFRSF10D	0.15008		RAD23B	0.999
TGM2	0.00327346		CDA	0.149997		GFRA1	0.999
ARV1	0.00328236		CADM1	0.149963		IGFBP3	0.999
ZKSCAN8	0.00329117		RUNX1T1	0.149878
LPAR3	0.00331076		OSMR	0.149633
TIPARP	0.00332792		PPARA	0.149625
FLT1	0.00336195		LINC00161	0.149537
SULF1	0.00336195		TMEM45A	0.149227
FHL1	0.00343289		CLSTN1	0.149074
PAIP1	0.00345997		KCNK2	0.148823
TWIST1	0.00346973		GABBR1	0.148788
GEM	0.0036056		NMT2	0.148572
FAM107B	0.00366644		COBLL1	0.148517
OSTM1	0.00366644		GXYLT1	0.148264
ADAMTS1	0.00369917		NEXN	0.14817
PSMB8	0.00370861		SOX11	0.148015
TMTC1	0.00371691		RAB30	0.147666
MAP2K1	0.00376597		P4HA1	0.147618
MMP14	0.00381181		ZBP1	0.147617
NEDD9	0.00385019		KIR2DL5A	0.147564
ZNF106	0.00385555		KIR2DL5B	0.147564
ELMOD2	0.00386292		PLPPR4	0.147559
ZEB1	0.00393931		IFI35	0.146834
IARS	0.00394991		TRIM23	0.146494
CNST	0.00395078		TENM4	0.146323
EYA4	0.00398327		RPS28	0.146229
CSRP1	0.00409969		SRGAP1	0.14621
FNDC3B	0.00415208		FBXO24	0.146093
RANBP17	0.00415586		CBS	0.145766
C8orf34	0.004301		CBSL	0.145766
MEX3B	0.0043256		IL12A	0.145691
TMEM158	0.00433827		CCNYL1	0.145627
BTN2A1	0.00433827		TMEM106B	0.145546
FARP1	0.00434095		TBC1D19	0.145352
CLSTN1	0.00434095		SLC8A1	0.145265
SSX2IP	0.00434214		PPP1R15B	0.144992
NLRP1	0.00439575		COL15A1	0.144642
LOC728392	0.00439575		KRTAP1-5	0.144393
ADH1C	0.00444058		ACTA2	0.143941
ADH1A	0.00444058		ASF1A	0.143931
ADH1B	0.00444058		TPD52L1	0.143889
ID3	0.00445936		TRUB1	0.143832
CASP6	0.00453908		ZNF638	0.143631
SYAP1	0.00454674		MEGF9	0.143503
ERGIC1	0.00454674		NDFIP2	0.143473
SDC2	0.00454674		MAN1A2	0.143444
NTN4	0.00459048		FAM107B	0.143428
AASS	0.00459908		SLC22A12	0.143277
P4HA1	0.00459908		SNORA12	0.143271
ZNF503	0.00459908		CTGF	0.143265
TMEM52B	0.00459908		NRG1	0.143256
HIST2H2BE	0.00459908		IKBIP	0.143126
HEXB	0.00460174		MCM3	0.143018
ZNF608	0.00462461		SECISBP2L	0.142907
GFPT1	0.00462585		FHL3	0.142649
PHLDA2	0.0046755		AOX1	0.142383
EEA1	0.00470665		ADGRL4	0.142335
HLA-B	0.00470726		CXXC1	0.142285
SEMA3C	0.00470726		LOC653513	0.142112
IFIT1	0.00470726		PDE4DIP	0.142112
RBBP4	0.00472301		C3orf14	0.142072
HMGN3	0.00472961		EFNB2	0.141941
RBMX	0.00474198		ZNF468	0.141721
RBMXL1	0.00474198		RALGAPA2	0.14126
PPP1R15B	0.00480967		NFE2L3	0.141213
RRAS2	0.00491412		B4GALT4	0.1412
BTBD3	0.00491412		IKZF2	0.141038
PTS	0.00493734		PMAIP1	0.141036
DCTN1	0.00493734		FRY	0.14099
NABP1	0.0049639		SRPX2	0.140838
ZNF711	0.00498347		IL16	0.140772
RGCC	0.00500459		TRIM14	0.140582
SHC4	0.00500459		ARSK	0.140383
C1R	0.00502208		SLITRK1	0.140369
PRSS12	0.00502208		SNCAIP	0.140309
HOXB4	0.00505735		FAM3C	0.14016
TMEM2	0.00505735		NCEH1	0.140026
SRRM3	0.00506049		CACNB3	0.139994
DYNC1H1	0.00508722		ZWINT	0.13989
PPP1R1C	0.00512939		P2RY11	0.139645
HACD1	0.00512939		PPAN-P2RY11	0.139645
TBRG1	0.00520012		TRIM45	0.13952
MTMR10	0.00521332		NPRL3	0.139129
EPRS	0.00522311		FNBP1L	0.139084
MAEA	0.00530865		TCEANC2	0.138793
ZNF609	0.00538194		LMBR1L	0.138581
RAB3B	0.00541393		ATP2B4	0.138557
TNFSF18	0.00541393		ASCC3	0.138184
PPARA	0.00541972		KLHDC1	0.138126
IRAK1	0.00541972		TNNT3	0.137872
SDCBP	0.00541972		C2orf74	0.137835
CYTL1	0.00541972		EXD2	0.137831
GALNT5	0.00542021		TMEM68	0.137778
ECSCR	0.00542021		STOM	0.137756
PDGFRL	0.00542834		SLC25A32	0.137744
SMAD3	0.00542834		C14orf28	0.137498
UBE2E3	0.00545705		TMEM47	0.13748
PIGS	0.00547029		NID2	0.137259
SEMA3D	0.00551747		GRAMD3	0.137244
TBX5	0.00551888		UTY	0.13724
IQGAP1	0.00552518		KIT	0.13687
HEG1	0.00558242		TOP1MT	0.13677
HBD	0.00559839		TXNIP	0.1367
HBD	0.00559839		TPR	0.136687
PHF14	0.00560526		MPHOSPH8	0.136651
ITGA3	0.0056082		KCTD20	0.136434
TGIF1	0.00568538		KIAA0895L	0.13641
UTY	0.00572396		SQSTM1	0.13612
UROD	0.00573484		SENP5	0.136061
MAP1B	0.0057614		SSX2IP	0.135877
SH2D4A	0.00578193		NXPE3	0.135455
HNRNPA1P10	0.00585894		ALAS1	0.135396
APEX1	0.00587084		PHYH	0.135303
PALLD	0.00590908		RNASE4	0.135206
SPCS3	0.00597341		PAPSS2	0.135026
SNTB1	0.00598063		SERPINI1	0.134944
ASF1A	0.00600928		TCAF1	0.134566
MPP5	0.00603349		TBXAS1	0.134554
PAPPA	0.00607897		C2orf68	0.134507
WDR66	0.00610387		RAB3GAP2	0.13432
RHCE	0.00611994		AURKAPS1	0.13432
RHD	0.00611994		AURKA	0.13432
RCN1	0.00625791		FOXRED2	0.134196
SLC44A1	0.00625791		43529	0.134185
COL15A1	0.00625791		SUSD1	0.134013
DKFZp686K1684	0.00625791		HMGA2	0.133815
SOX9	0.00628363		ZNF429	0.133713
C11orf98	0.00628363		NEDD4L	0.133354
MLEC	0.00628363		FOXL1	0.133211
LBHD1	0.00628363		RPP30	0.133194
SNORA84	0.00628935		ARPC4-TTLL3	0.133128
LOC100996517	0.00634586		TTLL3	0.133128
LOC102724364	0.00634586		PSMB9	0.132961
LOC100996716	0.00634586		DPH3	0.132813
SEC22B	0.00634586		ITGA2	0.132417
SCD	0.00641597		CASP4	0.132408
C1orf52	0.00650101		ZDHHC21	0.132405
ZNF436-AS1	0.00650101		GALM	0.132401
PAFAH1B1	0.00651039		P3H3	0.132089
CPA4	0.00654612		TUBB3	0.132067
TP53I3	0.00655363		UGCG	0.131865
SRGAP1	0.00660538		TUBE1	0.131853
NRBF2	0.00661754		PRSS23	0.131641
ITGA2	0.00661754		MRPL33	0.131625
SALL1	0.00668679		AGER	0.131492
ITGB1	0.00670564		ACADSB	0.131363
SRPX	0.00670564		WNT5B	0.131334
TNFRSF10C	0.0068265		LUM	0.131316
PPP3R1	0.00682971		NF2	0.130804
RFX8	0.00685589		DNAJB9	0.130561
EDN1	0.00685589		TCF3	0.130501
CTSC	0.00687315		DAB2	0.130497
C14orf28	0.00687315		PHLDB1	0.130469
COL1A2	0.00690362		PTPN13	0.130417
CLEC2B	0.0069361		DDIT3	0.130356
GARS	0.00694318		RCAN1	0.130229
C16orf62	0.00694789		RBM24	0.130111
HNRNPA1	0.00696353		CFLAR	0.129922
PXN	0.00696353		TPP1	0.12984
TPP1	0.00700323		RBBP4	0.12982
IKZF2	0.0070302		STXBP6	0.129559
FHL3	0.00709443		ATP8B1	0.129435
GABRB1	0.00710052		RASSF8	0.12931
LIFR	0.0071288		NACC2	0.128981
ADAM23	0.00718176		ITGA7	0.128876
AP1S2	0.00719234		ARHGAP29	0.128802
TAOK1	0.00721353		ACTG2	0.12866
C14orf93	0.00725761		TMEM35	0.128242
SLC16A7	0.00727739		FABP5	0.12824
DUSP6	0.00733355		BST1	0.128227
FLOT1	0.00739348		TRIM47	0.128185
PTGR1	0.00740759		WDR66	0.128153
NPHP3-ACAD11	0.00743399		SPSB1	0.12815
ACAD11	0.00743399		EPG5	0.128004
IL6ST	0.00743399		PPFIA1	0.127922
TRIM7	0.00743676		LSAMP	0.12783
KIF5B	0.00753302		ALPK2	0.127811
HS1BP3	0.00763873		METTL2B	0.127569
SP140L	0.0076477		AQR	0.127458
CDC42BPA	0.00772905		43717	0.127428
FSTL3	0.00786324		RANBP17	0.127387
TM4SF1	0.00786324		LDB2	0.127158
POLR2L	0.00790619		FAM174A	0.12683
SHOC2	0.00797186		SLC50A1	0.126714
SQSTM1	0.00797186		DDIT4	0.126506
IFI16	0.0079772		TRMT2B	0.126487
DDX52	0.00801436		KLF12	0.126426
PHACTR2	0.00801436		PHF6	0.126374
IFT20	0.00801436		TNFRSF11B	0.126271
IL20RB	0.00806893		CYB561	0.126156
LOXL4	0.00809976		SNTB1	0.126136
PCSK5	0.0081617		SMARCD2	0.126021
QSOX1	0.00816992		SOX9	0.125902
FLJ23867	0.00816992		IL6	0.125754
POP5	0.00816992		APP	0.125632
ATP1B1	0.00818327		EPHB2	0.125627
PTPRM	0.00831047		PLOD2	0.125611
TMEM136	0.0083277		DESI1	0.125549
INA	0.00834098		AKR1B10	0.125381
TMED9	0.00842399		AKR1B15	0.125381
MGST3	0.00842399		KLHL7	0.125353
REEP3	0.00849467		TCF12	0.125263
CLIP1	0.00851147		MANSC1	0.125203
P3H1	0.00855987		CITED2	0.125178
GTPBP8	0.00871324		BAMBI	0.124887
UBE2L6	0.00874888		LOC100507412	0.124766
BCL2L2	0.00877846		SLC7A5	0.124529
APP	0.00880543		MRVI1	0.124274
SEC14L1	0.00881275		WNT5A	0.124094
LUM	0.00890314		EGR1	0.124085
KPNB1	0.00890905		NCOA7	0.123994
CYB561	0.00890905		AQP10	0.123864
PLAU	0.00898312		TXNDC15	0.123776
SMARCA4	0.00900368		SIL1	0.123725
HN1	0.00900588		DNAJC25	0.123636
SIL1	0.00906262		KRTAP2-3	0.123617
JTB	0.00907178		RCC1	0.123583
FAM3C	0.00908225		TRIB2	0.123542
SLC20A1	0.00908225		LOXL2	0.12347
DESI1	0.00908632		GGCX	0.12338
SLC3A2	0.00910169		MEI1	0.123322
ABHD12	0.00913663		ARHGAP6	0.123302
FBL	0.00916937		PHACTR2	0.123217
NXPE3	0.00916937		C16orf62	0.123201
NEDD4L	0.00916937		HOXB6	0.123082
ZMIZ1	0.00916937		CNST	0.122752
TTC13	0.00922162		VCAM1	0.122732
AAMDC	0.00926033		KLHL13	0.122517
TYMS	0.00929141		SLIT2	0.122508
MSRB3	0.00932057		METTL7A	0.122424
PLCD1	0.00934401		MCEE	0.122403
METTL13	0.0094124		PRKDC	0.122226
HGF	0.00942003		TMEM119	0.122148
GPC2	0.00942426		NPHP3-ACAD11	0.122111
ABCC9	0.00945653		ACAD11	0.122111
PLCB1	0.00948204		YAP1	0.122093
ALAS1	0.00949431		CLEC2B	0.122058
TRIM16	0.00954962		ALG11	0.121725
TRIM16L	0.00954962		UTP14C	0.121725
TPM2	0.00955722		CLMP	0.121634
FXR1	0.00955722		CAP2	0.12159
NECAP1	0.00955722		SDC1	0.121578
RUNX2	0.00955722		FGD4	0.121548
CASP1	0.00955722		PAPD4	0.121545
PROS1	0.00955722		VCAN	0.121369
ULK3	0.00955722		MAP4K4	0.121192
PRRX1	0.00963532		HIST1H2AE	0.121183
YAP1	0.00966717		NR4A1	0.121162
ALDH3B1	0.00966717		ABAT	0.121099
INMT	0.00968056		NSUN5P1	0.121087
ASCC3	0.00968675		NSUN5P2	0.121087
CAP2	0.00969786		POSTN	0.120395
TGFBR2	0.00969786		SPHK1	0.12012
FLYWCH1	0.00969786		CNOT10	0.120085
CC2D2A	0.00977375		F2RL2	0.120047
CHPF2	0.00977375		DDX39A	0.11998
MLF1	0.00977375		SLC39A10	0.119976
TERF2IP	0.00978107		WRB	0.119819
NCEH1	0.00978107		GLI3	0.119781
DBF4	0.00978107		NNMT	0.119767
P3H3	0.00980906		HBEGF	0.119681
BACE1	0.00982606		HOXB4	0.11966
MAGED4	0.009923		TCF4	0.119649
MAGED4B	0.009923		MLEC	0.119581
EFEMP1	0.0099959		KLF4	0.119534
CCPG1	0.010174		TAPT1	0.119491
DYX1C1-CCPG1	0.010174		MEST	0.119475
CHN1	0.010174		FANCL	0.119462
LAYN	0.0102506		ZNF800	0.119351
POLD4	0.0103004		AASS	0.119074
LARP6	0.0103225		ARAF	0.118826
RHOT1	0.0103384		HAGH	0.118791
BMP4	0.0103384		MYO10	0.118662
FABP4	0.0103835		CARD16	0.118591
MITF	0.0104031		NUP54	0.118529
ABAT	0.0104292		PPP3R1	0.118462
AHNAK2	0.010469		SH2D4A	0.118336
LRP11	0.0104705		LAS1L	0.118121
SLC14A1	0.0104705		SLC30A5	0.118057
LOC100507412	0.0104768		SAMD9	0.117999
NIPAL3	0.0104984		SCD	0.117866
RPL10	0.0105081		NFAT5	0.117697
DDX23	0.0105423		PCDH18	0.117528
ELL2	0.0105423		FARP1	0.117474
ANO4	0.0105666		LGR4	0.117464
TWF2	0.0105683		VGLL3	0.117452
SORT1	0.0107217		SRSF8	0.117444
SPATA6	0.010727		CTSC	0.117186
HSPD1P5	0.0107438		PCSK5	0.117079
ATG16L2	0.0107546		BTN2A1	0.117067
ARF4	0.0107838		DDX23	0.116987
CYP2U1	0.0108683		IRS2	0.116919
MFGE8	0.0108683		MRS2	0.116821
GJA3	0.0108683		CCDC81	0.116819
MPP4	0.0111295		C5orf28	0.116775
LIF	0.0111316		GRN	0.116773
HBEGF	0.0111627		BHLHE40	0.116748
ZNF74	0.0112174		SPR	0.116748
PTPRQ	0.011224		CELSR3	0.11673
HACD3	0.0112952		ANXA3	0.116693
MCM3	0.0112952		DNAH5	0.116668
MKL2	0.0112952		AFF4	0.116635
HNRNPA3	0.0113129		CSNK1G2	0.116441
HNRNPA3P1	0.0113129		ZNF655	0.116397
LPXN	0.0113238		POLDIP3	0.116125
KLHL7	0.0113238		PRSS12	0.116061
ARHGAP29	0.0113469		HSPA14	0.116027
SLC50A1	0.0114297		ERGIC1	0.11602
HEXA	0.0114803		TEAD2	0.115974
PKD2	0.0115283		CHST2	0.115904
HSD17B11	0.0115743		SF3B3	0.11585
SLC35B3	0.0115743		SLFN11	0.115719
EIF3L	0.0115896		GNS	0.115584
LOC653513	0.0115896		LOC105372868	0.115541
PDE4DIP	0.0115896		LOC105372935	0.115541
BAMBI	0.0115896		USP18	0.115541
OXA1L	0.0116152		LOC102725067	0.115541
FAM60A	0.0116224		LOC105379548	0.115541
GOLIM4	0.0116275		LOC105372942	0.115541
BLVRB	0.0116399		LOC105377182	0.115541
PSMB9	0.0116557		TMEM2	0.115347
TBXAS1	0.0119127		STXBP5	0.115298
CDK5RAP3	0.0119592		PSMB8	0.114856
SIX4	0.0119835		LYSMD3	0.11481
DPYSL3	0.0120605		CDK5RAP3	0.114784
HIST1H4C	0.0121422		ETHE1	0.114606
P4HB	0.0122474		FAM129A	0.114554
MYLK	0.0123292		IL10RB	0.114458
ATP2A2	0.012399		SIRPA	0.114451
SGK223	0.012399		NALCN	0.114295
BIRC3	0.0124086		PSPC1	0.114253
GTF2I	0.0124432		LINC01119	0.114205
GTF2IP1	0.0124432		COL3A1	0.114136
GTF2IP4	0.0124432		MPP5	0.113959
FKBP14	0.0124644		SHMT2	0.11386
TPBG	0.0125581		AGBL5	0.11385
MCM4	0.0125594		SSR3	0.113847
B3GNT2	0.0126274		GM2A	0.113776
ALG11	0.0126363		PTGER4	0.113633
UTP14C	0.0126363		ZNF608	0.113612
FLVCR2	0.0126543		SMIM13	0.113605
GPR176	0.0126753		PPP1R3C	0.113592
SGK3	0.0126853		HS1BP3	0.113291
VEGFB	0.0126853		PLCD1	0.113205
TMED4	0.0126853		HLA-DPB1	0.113084
C8orf44-SGK3	0.0126853		GAL3ST4	0.11289
BTN3A3	0.0126896		MAP1A	0.112886
LRP12	0.0127118		FSTL1	0.112859
MPC2	0.0128368		GNG12	0.112598
HIST1H2AC	0.0128459		HEG1	0.112307
SLC22A4	0.0128473		TMEM237	0.112286
DHRS3	0.0128473		ADAMTS12	0.112238
SRPK2	0.0128723		HIST2H2BE	0.11206
STXBP6	0.0128723		NABP1	0.112032
MRPL15	0.012917		LOC105372733	0.112029
PCDH18	0.0130154		RBKS	0.111994
SIRPA	0.0130719		SPCS3	0.111992
NSUN5P1	0.0131677		HSPE1-MOB4	0.11199
CBS	0.0131677		HSPE1	0.11199
NSUN5P2	0.0131677		GALNT2	0.111954
CBSL	0.0131677		FAM198B	0.111765
RBM15B	0.0132852		IRF9	0.111762
IQCJ-SCHIP1	0.01339		METTL13	0.1117
SCHIP1	0.01339		AAMDC	0.111573
LOC105372733	0.0134255		DLG3	0.111539
POLDIP3	0.0135081		COL5A1	0.111531
FAM180A	0.0135501		PMEPA1	0.111519
SLC37A4	0.0135661		TRIB3	0.111519
FGD4	0.013609		ARMC8	0.111489
SLC39A7	0.0136314		PRPS1	0.1113
RASAL2	0.0136314		MB21D2	0.111297
HLA-DPB1	0.0136765		PIK3CA	0.111228
RSL1D1	0.0137022		OGT	0.111068
ACO2	0.0137296		ATP5SL	0.110956
TRHDE	0.013741		MTMR10	0.110936
LDOC1	0.0137584		TMEM158	0.110922
GOLGA1	0.0137687		BTBD3	0.110885
KLF4	0.0138427		SOX12	0.110882
APOBEC3C	0.0138427		DDX6	0.110881
SCG5	0.0138427		SMAD5	0.110823
TRIM55	0.0138726		PLA2G15	0.110778
ADCY6	0.0138827		CYP2U1	0.110596
METTL2B	0.0139321		LOXL4	0.110571
FADS1	0.013954		DCTN1	0.110525
MCFD2	0.013954		NR2F6	0.110507
ERRFI1	0.013954		SGMS2	0.110451
RNF220	0.0141		XBP1	0.110404
MARCKS	0.0141		GJA3	0.110349
LAS1L	0.0141205		PTPN11	0.11029
CD59	0.0144282		KCNMA1	0.110254
PARP9	0.0144586		TBRG1	0.110165
PEF1	0.014505		SLFN5	0.110159
CYB5A	0.0145203		SUCO	0.11012
NPTX1	0.0145587		LMAN1	0.110075
SLC25A32	0.0145587		ANPEP	0.109999
FAM69A	0.0145953		PELO	0.109989
PRKAG2	0.0145953		FBXW11	0.109867
SENP5	0.0145953		HS3ST3B1	0.109805
TMPO	0.0147085		HS3ST3A1	0.109805
NDUFB9	0.0147085		ZC4H2	0.10974
ZBED5	0.0147085		SKAP2	0.10963
PPIB	0.014789		KRR1	0.109598
SMAD5	0.0148094		P3H4	0.109462
HMBOX1	0.0148524		MITF	0.109418
CCL7	0.0148534		FAM69A	0.109025
CSNK1A1	0.0148884		PDE7A	0.109014
TMEM19	0.0148884		CC2D2A	0.108999
FARSB	0.014977		PPP1R12B	0.108866
SLC6A6	0.0150107		TUFT1	0.108763
F8A1	0.0150107		TGIF1	0.108729
SRP9	0.0150107		GAL	0.108487
F8A2	0.0150107		TWIST2	0.108471
F8A3	0.0150107		RASAL2	0.10842
REEP5	0.0150649		FAM177A1	0.108386
FANCL	0.015253		COL4A1	0.108377
CCNYL1	0.0152875		BTN3A3	0.108229
FBN2	0.0154222		MGC27345	0.108158
SDHAP1	0.0154222		RBM28	0.108158
SDHAP2	0.0154222		MCM4	0.107925
CTBP2	0.0154222		SGK223	0.107774
SDHA	0.0154222		MSRB3	0.107675
BCL9L	0.0154455		LOC101930123	0.107617
CD274	0.0154455		EEF2K	0.107617
LEPROT	0.0155358		EML2	0.107564
PARVA	0.0155689		DUSP1	0.107548
WFDC1	0.0155689		TBX3	0.107311
PLA2G15	0.0155689		BCCIP	0.107073
PPFIA1	0.0156958		HIST1H2BC	0.107033
SLC22A12	0.0156958		SLC25A30	0.107033
CCDC115	0.0156958		MYO5A	0.107016
FOSL2	0.0157172		PKD2	0.106952
SDC1	0.0158062		TTC3	0.106801
HSPD1	0.015819		GLUL	0.106739
FAM20C	0.0158203		CABLES1	0.106716
SERINC3	0.0160154		IFI16	0.106708
CRIPAK	0.0160189		IFNAR1	0.106696
PYROXD1	0.0161028		C9orf3	0.10669
CNOT10	0.0161058		UAP1	0.106685
SAMD9	0.0162032		PEPD	0.106637
METTL7A	0.016371		AFF1	0.106394
KRR1	0.016371		NAV1	0.10639
CDK6	0.0164578		GRIK2	0.106388
HCFC1R1	0.0164578		COPZ2	0.106372
HMBS	0.0164624		YPEL2	0.106324
SMARCD2	0.0164736		LTBP1	0.106321
STT3B	0.0164774		LDLR	0.106136
PEX1	0.0164774		C6orf1	0.10613
ARAF	0.0165145		FARS2	0.106122
TSPAN3	0.016532		MPC2	0.106095
DDR2	0.0165498		SRPK2	0.106092
TRIB3	0.0165872		DICER1	0.10604
DDA1	0.0166119		MEIS2	0.105955
MYDGF	0.0167228		LGMN	0.105816
IRS1	0.0167228		POGLUT1	0.105793
DNAJC15	0.0167228		PBX2	0.105738
RAI14	0.0167228		SNRPA1	0.105687
ARHGAP6	0.0167623		NT5C2	0.105554
TLE4	0.0167833		SIGIRR	0.105504
LHFP	0.0169316		FMR1	0.105493
FAM65C	0.0169647		POFUT2	0.105419
CFL2	0.0169647		MKL2	0.105345
TNNT3	0.0172889		STC2	0.105326
SNORA12	0.0173373		RPL10	0.105323
RND3	0.0173555		IDH1	0.105222
CREB3L1	0.0173627		SLC26A6	0.105124
ZNF655	0.0174107		KDM2B	0.105115
MLPH	0.017491		MFSD6	0.105109
PQBP1	0.0175329		IQCJ-SCHIP1	0.105104
CEBPG	0.0175364		SCHIP1	0.105104
DENND5A	0.0175983		FAM60A	0.105007
GXYLT1	0.0175983		ECHDC3	0.104903
KIAA1715	0.0175983		MDK	0.104884
MUM1	0.0175983		VKORC1L1	0.104812
SIGIRR	0.0175983		RRS1	0.104785
TRIM23	0.0175983		UVSSA	0.104745
OSTC	0.0176058		LIF	0.104704
ECHDC2	0.0176058		F3	0.104652
SLC35A3	0.0176058		KHDRBS1	0.104599
HSPA5	0.0176058		IL11	0.104583
HSPB2-C11orf52	0.0176181		ENDOD1	0.104508
C11orf52	0.0176181		MCM7	0.104352
PCOLCE	0.0176672		HECW2	0.104292
CCNL2	0.0177033		RIN1	0.10425
TNFSF4	0.0177033		RBMX	0.104247
NF1	0.017787		RBMXL1	0.104247
KLHDC2	0.0178198		SLC6A6	0.10423
STX10	0.0178198		GNPDA1	0.10417
ICAM1	0.0178488		MFSD8	0.104027
PLEKHA5	0.0179002		CRMP1	0.103917
KBTBD8	0.0179011		RDH10	0.103894
PTBP2	0.0179011		NMRK1	0.10389
ARSJ	0.0179011		ALDH3B1	0.103841
TMSB15B	0.0179512		LRP12	0.103824
SNRPA1	0.0180094		CASP6	0.103712
SNCAIP	0.0180124		CRY1	0.103678
NASP	0.0180291		CCNI	0.103617
LMF2	0.0180831		PIK3R4	0.103616
AHR	0.0181638		ZNF791	0.103549
TOP2B	0.0181901		FKBP14	0.103376
PCDH7	0.0183514		EXT2	0.103212
LOC105372868	0.0183669		CALU	0.103058
LOC105372935	0.0183669		SNHG12	0.102983
SLC35F5	0.0183669		FBLN1	0.102922
USP18	0.0183669		TGOLN2	0.102773
LOC102725067	0.0183669		ATP1B1	0.102721
LOC105379548	0.0183669		B3GNT2	0.102654
LOC105372942	0.0183669		AHR	0.102612
LOC105377182	0.0183669		CPT1A	0.102604
GGCX	0.0183793		GLOD4	0.102514
RASSF8	0.0183793		NCOA3	0.102488
ABHD14A-ACY1	0.0183793		PGM2L1	0.10232
ACY1	0.0183793		CEBPG	0.102268
AARS	0.0183793		GAS6	0.10226
LMAN1	0.018511		ACO2	0.102211
KLHL5	0.0185292		NOL6	0.101842
CDC42EP3	0.0185327		UBR1	0.101624
C19orf66	0.0186331		HOXB3	0.10162
C5orf45	0.0186358		ADCY6	0.101607
MBTPS2	0.0187054		MAP4	0.101551
PAPD4	0.0187292		EIF4B	0.101509
MALT1	0.0187782		AP2B1	0.101474
MARS	0.0187782		UBA7	0.101445
DDIT3	0.0187863		DAAM1	0.101343
NR2F6	0.0187863		NPC2	0.101321
TMBIM1	0.0188821		TMCO3	0.101225
RBKS	0.0188915		MAP1B	0.101203
ERP29	0.018956		DARS	0.101092
SLCO2B1	0.018956		SLC35F5	0.101067
LHX4-AS1	0.0189576		PIN4	0.101022
ACBD6	0.0189576		LY75-CD302	0.101005
RAB3GAP2	0.0190324		CD302	0.101005
AURKAPS1	0.0190324		SIX4	0.100976
AURKA	0.0190324		PAFAH1B1	0.10094
IFI35	0.0192519		OSTM1	0.100868
DKK1	0.0193403		TRIM24	0.100822
ECHDC3	0.0193403		FAM160B2	0.100772
SNRPB	0.0193589		FMN2	0.100748
NFAT5	0.0194592		MARCKS	0.100744
PHC1	0.019508		AARS	0.100725
POFUT2	0.0195226		QSOX1	0.100716
XPC	0.0196761		FLJ23867	0.100716
MATR3	0.0196761		TWIST1	0.10066
ALDH18A1	0.0196761		SEC14L1	0.100646
EPHB2	0.0196761		NTN4	0.100433
ALCAM	0.0196761		LDLRAD3	0.100411
AQR	0.0197022		BCKDHA	0.100393
GLS	0.0197022		FN1	0.100391
SEPT9	0.0197022		IFIT1	0.1003
TRIM47	0.019729		SSH1	0.100269
SLC30A1	0.0198601		ITGBL1	0.100142
KAT6A	0.0199065		GPC6	0.100106
DHFR	0.0199789		SC5D	0.100035
TNFAIP1	0.0200248
MFSD6	0.0203104
SPP1	0.0203104
SSR3	0.0203104
GOLGA8A	0.0203431
GOLGA8B	0.0203431
CPLX2	0.0203477
USP19	0.0203477
PABPC1L	0.0203477
CLTB	0.0203812
TXNRD1	0.0204123
KIR2DL5A	0.0204209
SELT	0.0204209
TRMT2B	0.0204209
KIR2DL5B	0.0204209
NOL6	0.0204967
HCFC1	0.0206583
SLC38A4	0.0206583
ANKRD34A	0.0207156
TUBE1	0.0207513
MEIS1	0.0207513
BORCS8	0.0207962
PABPC5	0.0207962
C2orf74	0.0208499
DLST	0.0209028
ENDOD1	0.0209028
SMARCE1	0.02097
MARCH5	0.0209942
CERCAM	0.0210617
FTSJ3	0.021143
MAVS	0.021143
NEK6	0.021426
DPY19L2	0.0214491
HERC4	0.0214491
ATP10D	0.0214739
NPM1	0.0215206
GPR37	0.0215206
EDEM3	0.0215338
FADS2	0.0215338
VAMP4	0.0215408
TMEM14A	0.0215939
SLC35E1	0.0216613
NCOA3	0.0218117
MCEE	0.0218406
SC5D	0.0218507
NAP1L5	0.0218629
INPP5A	0.0218873
LIMS2	0.0218955
ACTL6A	0.0219172
PGLS	0.0219172
TM2D1	0.0219172
CHST2	0.0219172
WARS	0.0220188
LOC100133299	0.0220739
IL10RB	0.0220739
ABCA1	0.0221704
CPD	0.0222052
MYL9	0.022231
TARS	0.0223472
TFPI	0.0223681
PYCR1	0.0224956
TIMP2	0.0225147
LINC01119	0.0225293
SSU72	0.0225293
OS9	0.0225675
TMEM68	0.0226091
DLG3	0.022663
TPST1	0.0227596
EIF4A2	0.022766
NMT2	0.022766
SSH1	0.0227782
HMG20B	0.0227782
BCCIP	0.0228199
FKBP10	0.0228651
ZC4H2	0.0230697
IL6	0.0231113
NDUFB6	0.0231113
NONO	0.0231633
NOMO1	0.023197
NOMO2	0.023197
NOMO3	0.023197
LOC102723728	0.023197
SRI	0.0233768
ZNF804A	0.0234022
TCEANC2	0.0234022
THUMPD1	0.0234022
TMEM208	0.0234161
TAGLN	0.0234421
TCAF1	0.023471
STIP1	0.02354
ATP2B1	0.02354
CCDC81	0.02354
BAG1	0.02354
FBLN1	0.02354
VIMP	0.02354
KRCC1	0.0236272
TPR	0.0237008
PC	0.0237089
IFNAR1	0.0237089
TSPAN4	0.0237648
ITGBL1	0.0239107
MYPN	0.0239798
KLF12	0.0239798
CHEK1	0.0239798
MRPL9	0.0239798
EGLN2	0.0239798
DICER1	0.0239798
SYTL2	0.0239798
RAB4B-EGLN2	0.0239798
LRRFIP1	0.0239798
GLI3	0.0239798
CARS	0.0240303
SPIN1	0.0240924
C12orf75	0.0241261
GADD45B	0.0241635
TOR1A	0.0242147
FAM50A	0.0242361
RNF6	0.0242487
DNAJB4	0.0242958
PIK3C3	0.0242978
D2HGDH	0.0243828
PTPN12	0.0243828
HIST1H2AD	0.0244126
HIST1H3D	0.0244126
MCM7	0.0244247
SKAP2	0.0245281
RGL2	0.0245555
BTN3A2	0.0245964
CDA	0.0247008
NIPA1	0.0247008
CPT1A	0.0247246
PTCRA	0.0247558
AMD1	0.0247558
PPP1R21	0.0247558
PXDC1	0.0247558
AMD1P3	0.0247558
FMN2	0.0248434
SVEP1	0.0249496
APBB2	0.0249496
MAFF	0.0250161
HMGA2	0.0250254
YPEL2	0.0250797
RAD50	0.0250872
PGK1	0.0251624
MFSD8	0.0251624
FLNB	0.0251624
PIGC	0.0251624
ADI1	0.0251817
NT5C2	0.025198
OSMR	0.0252146
AGA	0.0252164
ANXA3	0.0252476
FABP5	0.0253391
JDP2	0.0253474
SLC7A11	0.0253474
LGR4	0.0253474
NAB2	0.0253474
EIF4B	0.0253654
ZMYND8	0.0255385
LMBR1	0.025699
MALAT1	0.0257026
LGALS9C	0.0257242
LGALS9B	0.0257242
SEL1L3	0.0257704
PEA15	0.0257811
VAT1	0.025798
DRAM1	0.0258623
UBE2Z	0.0259081
SPHK1	0.026043
KDELR2	0.026043
C1orf54	0.026043
ELK3	0.026043
TAF10	0.026043
PTPN13	0.026043
ADAR	0.026043
AFF1	0.0261024
PIK3CA	0.0261024
ZAK	0.0261129
PRKCB	0.0261323
MEX3D	0.0261738
CACNB3	0.0262142
FOXRED2	0.0262143
DDAH1	0.0262143
FAR2	0.0262565
NDUFA13	0.0262789
AMPD3	0.0263227
RNF170	0.0264392
PCDH9	0.0264644
YRDC	0.0264689
PDLIM5	0.0266604
ZNF800	0.0266982
PRICKLE4	0.0267913
TOMM6	0.0267913
SPRYD7	0.0268978
NIPAL2	0.0268978
AGBL5	0.0268978
ADAMTS12	0.0269072
CDK4	0.0270001
ANKRD13A	0.0270001
EZH2	0.0270492
POLR2G	0.0271008
IDH3B	0.0271688
LEF1	0.0272003
HSPA14	0.0272003
SCN9A	0.0272003
TCP1	0.027227
SIPA1L2	0.0272575
LDB2	0.0273526
VGLL3	0.0273526
RUNX1T1	0.0273731
GPR180	0.0273731
GEMIN4	0.0273861
LOC100289511	0.0273944
AUTS2	0.0274058
TEAD2	0.0274171
SORD	0.0275675
MMP19	0.0275675
PRDX6	0.0276672
FMR1	0.0278622
ODC1	0.0278845
SEMA5A	0.0279326
RUVBL2	0.0279326
NUP107	0.0279326
PTGS1	0.0279326
PIK3R4	0.0279326
SF3B1	0.0280413
VKORC1L1	0.0281573
STYXL1	0.0281927
PCYOX1	0.0282349
GPCPD1	0.028242
SLC35E3	0.028242
ARID5B	0.028242
CASP3	0.028242
ATP5SL	0.028242
CCHCR1	0.028242
CD46	0.0282955
TECR	0.0282955
ZWINT	0.0283029
RAB30	0.028326
HS3ST3B1	0.0283284
HS3ST3A1	0.0283284
TLN1	0.0283284
COBLL1	0.0283335
LGMN	0.0283335
RAB8B	0.0284704
RIMS1	0.0284971
SNRPF	0.0285315
BAX	0.0285832
DMAP1	0.0286821
HTR2B	0.0287584
HIST1H4E	0.0288072
FBXW11	0.0288072
HNRNPDL	0.0288072
PTGES3	0.0288115
CROT	0.0289151
SYNC	0.0289226
LRPAP1	0.0290353
SECISBP2L	0.0290353
WSB1	0.0290585
CDV3	0.0290707
GUK1	0.0290813
TRIM45	0.0291306
NUP54	0.0293362
SLC25A4	0.0293731
HIST1H2BC	0.0295043
EXT2	0.0295132
IL11	0.029664
RALGAPA2	0.029664
XIRP2	0.029664
LSM2	0.0296828
C5orf28	0.0298397
NINL	0.0298397
CXCL12	0.0298594
IGIP	0.0299188
SF1	0.0299316
ADM	0.0299316
LOC100505585	0.0299457
ARHGEF1	0.0299457
FKBP7	0.029964
KDM1A	0.0299854
CXXC1	0.0300161
NUP98	0.0300161
LDLRAD3	0.0302422
CHRM2	0.0302454
PHF6	0.0302821
GNS	0.0302855
TSTA3	0.0303559
FNBP1L	0.0305223
TENM4	0.0305235
NES	0.0305235
ID4	0.0306047
BLOC1S5-TXNDC5	0.0306047
PRKCDBP	0.0306047
TXNDC5	0.0306047
RNPS1	0.0307266
PRKAG1	0.0307303
UTP11L	0.0307303
NF2	0.0307303
TUBB	0.0307303
STK4	0.0307303
PAPOLA	0.0307411
C1orf198	0.0307834
RAET1G	0.0308295
ULBP2	0.0308295
EMC7	0.0308295
DDX39A	0.0308295
RAET1L	0.0308295
MOSPD1	0.030835
NAV1	0.0308434
SOX11	0.0308819
GABBR1	0.0309129
NTF3	0.0309941
EFNB2	0.0310014
NRG1	0.0311584
STK32B	0.0311695
EIF3E	0.0312316
ZC2HC1A	0.0312316
OR51E2	0.0312316
ZFP36	0.0312958
CLTA	0.0312958
B4GALT1	0.0313084
MPZL1	0.0314182
MRS2	0.0314182
DVL2	0.0314998
ZNF791	0.0315022
GALNS	0.0315487
SF3B3	0.0315495
MOXD1	0.0315894
SGTB	0.0316677
BST1	0.0316677
PTGER2	0.031707
RUNX1	0.0318355
LOC100506403	0.0318355
HDGF	0.0318516
HLA-E	0.0318835
FARS2	0.0319888
SDC4	0.0320345
KAT5	0.032105
SLC26A2	0.0323026
CRY1	0.0323659
GRIK2	0.0323898
RAPH1	0.032398
TANGO2	0.0325352
CLDN23	0.0325358
PDE4A	0.0326246
NSF	0.0326466
PYGL	0.0326632
YIPF6	0.0326632
MYO5A	0.0326664
CNOT6	0.0326682
DDX6	0.0327058
FOXP1	0.0327058
ADH5	0.0328208
ADH5P4	0.0328208
TRIB2	0.0328208
HINT2	0.0328208
WWTR1	0.0328208
KATNAL1	0.0328242
SSRP1	0.0328242
HECW2	0.0328242
GPX8	0.0328265
RPUSD4	0.0328376
DCBLD2	0.0328661
SPINT1	0.0328861
IRF2BP2	0.0328861
SLFN5	0.0328861
SLITRK1	0.0328861
SPRED1	0.0328861
PPP1R12B	0.0328861
KRT18	0.0328861
TMEM51	0.0328861
CASP4	0.0329579
AQP11	0.0333428
WEE1	0.0333428
ZMYM6	0.0333428
AJUBA	0.0333428
TPI1	0.0333428
NR2F2	0.0334213
BCAT1	0.0334213
PNRC1	0.0334633
DDB2	0.0336035
SPANXD	0.0336864
SPANXC	0.0336864
GM2A	0.0337918
H3F3A	0.0338464
H3F3AP4	0.0338464
LY75-CD302	0.0339728
CD302	0.0339728
ANPEP	0.0339729
SBDS	0.0340187
SBDSP1	0.0340187
CCSAP	0.0340389
CANX	0.0341152
RNASEH2C	0.0341152
KPNA1	0.0341427
FAHD1	0.0341427
PXDN	0.0342055
FUS	0.0343193
ARL4A	0.0343193
SASH1	0.0343193
FAT4	0.0345081
MYO10	0.0345081
MB21D2	0.034523
HIST1H2AE	0.034546
TRAM1	0.0345971
BLCAP	0.0346335
DARS	0.0347536
DLC1	0.034827
KRTAP5-8	0.034827
LYSMD3	0.034827
DHCR24	0.0349604
KRTAP20-2	0.035014
RAPGEF2	0.0350364
PREPL	0.035038
SCRN1	0.0350877
GK	0.0351455
RPP30	0.0351764
TRUB1	0.0356432
SHMT1	0.0357191
ZNF274	0.0357191
BCAP29	0.0357271
NPRL3	0.0357503
SLC25A30	0.0357503
PICALM	0.0358547
METTL16	0.0358919
CELSR3	0.0359253
AFF4	0.0359664
UBA7	0.0360471
FILIP1L	0.0362164
NDNF	0.0362164
DDX3Y	0.0362164
TAPT1	0.0363581
COX5B	0.0365517
ALAD	0.0365563
ZNF429	0.0366138
RNF130	0.0366884
TMEM106B	0.0369825
TVP23B	0.0370404
TVP23C	0.0370404
RSU1	0.0370523
LARP7	0.0370523
EMP1	0.0370799
RCN2	0.0372971
GAL	0.0373393
SLC30A5	0.0373559
SETDB2	0.0374657
PRSS38	0.0375352
RPP25L	0.0375352
FBXO4	0.0376368
HSP90B1	0.0376465
ATG14	0.0376882
SETD6	0.037752
DPH3	0.0377737
SRSF8	0.0379179
RAP1GDS1	0.0379179
TOP1	0.0379326
PLK2	0.0380027
PTRF	0.0380279
LOC101930123	0.0380733
EEF2K	0.0380733
KDM2B	0.0381343
PDIA6	0.0381343
FAM160B2	0.0381493
PHB2	0.0381493
PSMA6	0.0382326
KIAA0391	0.0382326
MANSC1	0.0382465
RIN1	0.0382719
SEMA6A	0.0383303
CYCS	0.0383303
NUDT21	0.0383549
ZNF638	0.038473
HNRNPF	0.0385948
ERLEC1	0.0386022
RBBP9	0.0386545
DCTN4	0.038678
ACADSB	0.0387176
INF2	0.0387286
NCOA7	0.0387477
DDX39B	0.0387588
ATP6V1G2-DDX39B	0.0387588
UVSSA	0.0387588
C15orf48	0.0387588
SNORA30	0.0387588
SLC25A26	0.0387588
TP53INP1	0.0388188
LSAMP	0.0388188
CCDC24	0.0388188
TUSC3	0.0389789
CCDC85B	0.0390869
CFLAR	0.039098
COA6	0.0391664
NALCN	0.0393024
ATF6	0.0393026
ADIPOR1	0.0393171
SET	0.0393235
EGR1	0.0393235
TANC2	0.0393372
OLFML2B	0.039613
PPP1R9B	0.0397261
AURKC	0.0397553
MGLL	0.0397553
TOB1	0.0397553
HERPUD1	0.039762
ZDHHC21	0.0398024
CRMP1	0.0399512
ZBP1	0.0400256
CD151	0.0400657
BCKDHA	0.0401109
RCC1	0.0401213
ARL1	0.0401534
FUBP1	0.0401534
SYNGR1	0.0401534
LAMTOR2	0.0403108
ESYT1	0.0403727
NUPR1	0.0403865
ATRAID	0.0404264
TPRKB	0.0404419
TMEM30A	0.0404419
TNFRSF25	0.0404616
FAM129A	0.0405406
PKM	0.0405406
ATP8A2	0.0405407
IST1	0.0405704
LDLR	0.0405704
MRGPRF	0.0406589
CTDSP2	0.040675
SEC62	0.0406956
MAPK12	0.0407012
ANGPT1	0.0408396
N6AMT1	0.0409213
SLC38A1	0.0409767
TUFT1	0.0409984
CAPN2	0.0410209
LSM7	0.0410283
UBE2T	0.0410283
CDK11B	0.0410839
PBLD	0.0410839
CDK11A	0.0410839
DNAH5	0.0412004
SF3B5	0.0412004
CRELD2	0.0413614
GPR107	0.0414159
HNRNPUL1	0.0414339
ST13	0.0414339
PTPN11	0.0414339
PSAP	0.0414345
SSR1	0.0414345
SH3PXD2A	0.0414345
C2orf68	0.0415011
SLC12A4	0.0415593
CDKN1C	0.0416058
TAF6	0.0416058
SETBP1	0.0416647
DDX17	0.0417614
LMBR1L	0.0418039
C6orf1	0.0418702
EIF5A2	0.0419203
HLA-A	0.0420318
KLHDC1	0.0420701
MME	0.0420701
AGER	0.0420985
HAUS1	0.0421133
EML2	0.0421945
RBM24	0.0422319
PARP14	0.0422319
CKAP2	0.0422319
DNAJA1	0.0422319
PBX2	0.042315
CS	0.042315
TMEM39A	0.042315
CYB5B	0.0423228
SLC31A1	0.0424144
MGC27345	0.0425191
SLITRK5	0.0425191
ENY2	0.0425191
SAMD11	0.0425191
ABL2	0.0425191
RBM28	0.0425191
FAM21A	0.0425338
FAM21C	0.0425338
TGOLN2	0.0425532
ETNK1	0.0425773
LILRA2	0.0425773
CLGN	0.0425773
AKAP2	0.0426797
PALM2-AKAP2	0.0426797
GNL1	0.0426977
CLCN7	0.0427073
PPM1D	0.0427555
PDE7A	0.042786
HOXB3	0.042786
UBR3	0.0427953
P2RY11	0.0428161
PPAN-P2RY11	0.0428161
SLC39A13	0.0428239
TNFRSF12A	0.0428964
ARFIP2	0.0428964
FAM174A	0.0428964
ATP11B	0.0429571
PDHX	0.0429912
DDB1	0.0431254
SNTB2	0.0432873
NDRG4	0.0432873
SRPRB	0.0433186
RALGDS	0.0434502
PHLDB1	0.0435133
IL16	0.0435552
EMC1	0.0436625
HACD2	0.0436625
PMPCB	0.0436625
CLN8	0.043665
LGALS3BP	0.0436846
SNX3	0.0437038
ZNHIT6	0.043707
XPO6	0.0437729
RUVBL1	0.043776
DNAJC25	0.0437812
LRCH2	0.0439099
SRSF3	0.0439117
STXBP5	0.0439117
DAP	0.0439309
EIF4G1	0.0439626
GALM	0.0440614
SGMS2	0.0442369
PSMA2	0.0442369
PPM1B	0.0443247
ATP6V1C1	0.0443525
PON2	0.0444271
NID1	0.0444713
HNRNPU	0.0445188
RNF114	0.0446965
JUP	0.0447485
HERC6	0.0448234
OGT	0.0448298
ARL2-SNX15	0.0449552
ARL2	0.0449552
AQP10	0.0450241
HMGB1	0.0451099
NFE2L3	0.0451307
TOP1MT	0.0451606
PKIB	0.0451606
PDGFD	0.0451836
HIF1A	0.0452232
APEX2	0.0452232
HSPA4	0.0452451
TMEM245	0.0452625
CTNNAL1	0.0452625
ARL2BP	0.0454444
TRIM24	0.0454444
SLC26A6	0.0454444
ERCC1	0.0455487
ILF3	0.0455544
TXNRD2	0.0455617
EPB41L2	0.0455904
TPM1	0.0456162
RC3H2	0.0456162
SELM	0.0456218
NR4A1	0.0456585
MRPS15	0.045662
PGM2L1	0.0457186
GCA	0.0457544
TGFB3	0.0458061
TRAK1	0.0458179
QKI	0.0459309
ZNF468	0.0459309
ARMC8	0.0459723
PGM3	0.0459723
PEX16	0.0461164
CCSER2	0.0461164
CHMP7	0.0461487
SCRIB	0.0461487
AKIRIN1	0.0461487
EIF5	0.0461487
SLFN11	0.0461487
STS	0.0461487
SPSB1	0.0461487
RPS28	0.0461845
NCK1	0.0461941
STX12	0.0462155
FGF5	0.0463572
CSPG4	0.0464055
AKR1B10	0.0464055
KIAA0895L	0.0464055
AKR1B15	0.0464055
ZNF652	0.0464055
SUB1	0.0464462
KYNU	0.0464722
KANK2	0.0465572
MARCH6	0.0465894
FTL	0.0465987
BRD8	0.0466605
PPIH	0.0466617
CRIP2	0.0466859
U2AF2	0.046707
EIF4A1	0.046707
SENP3-EIF4A1	0.046707
CCDC109B	0.046707
PARD6G	0.0467992
MAP4	0.047019
NMRK1	0.0471783
FOXO3	0.0472007
FOXO3B	0.0472007
FAM65B	0.0472007
PMEPA1	0.0472896
PRKDC	0.0473126
ZNF839	0.0474193
RHOC	0.0474345
BID	0.0474546
EIF2S2	0.0474661
CORO1C	0.0474661
NACC2	0.0474919
OMP	0.0475629
PIN4	0.0475629
RCC2	0.0475629
FBXW8	0.0475629
SLC39A10	0.0476287
ETV1	0.0476287
SLC38A7	0.0476899
RBFOX2	0.0477373
P3H4	0.0477373
ARPC4-TTLL3	0.0477716
TTLL3	0.0477716
RING1	0.0477716
C9orf3	0.047802
PROSER1	0.047802
MEIS2	0.0478707
NUCB2	0.0479874
MYOZ2	0.0480011
CLN5	0.0480303
KLHL13	0.0480821
CD81	0.0482323
RELN	0.0482323
CABLES1	0.0482323
DAAM1	0.0483333
SNAP23	0.0483739
STAT6	0.0483893
BMPR2	0.048419
MTDH	0.048419
KCTD20	0.048419
PTGS2	0.0484908
UBR1	0.0485108
RGS4	0.0485134
CALR	0.0485134
FBXO24	0.0485869
HNRNPD	0.0488798
PLEKHA1	0.0490845
WDR61	0.0491151
LOC102724770	0.0491151
DGCR6	0.0491151
POGLUT1	0.0491151
DGCR6L	0.0491151
DHX9	0.0491428
ZNF512	0.049155
LINC00161	0.0491557
CCDC107	0.0491557
MEI1	0.0491557
VAMP3	0.0491557
PRRX2	0.0491722
SYF2	0.0492088
C1orf122	0.0492088
FAM127B	0.0492501
QRICH2	0.0492609
C5orf15	0.049404
NAP1L4	0.0494105
OST4	0.0494602
ARL9	0.0495011
GLMP	0.0495071
SPPL2A	0.0495071
VEGFA	0.0497342
EXD2	0.0498399
KIAA0430	0.04984
IRX4	0.04984
ARHGAP22	0.04984
UBE2F	0.04984
BHLHE40	0.0498912
