# Supplementary material for: HYAL1 Is Downregulated in Idiopathic Pulmonary Fibrosis and Inhibits HFL-1 Fibroblast Proliferation When Upregulated
Source: Biomed Res Int. 2020 Mar 11;2020:3659451. doi: 10.1155/2020/3659451 (PMC7086424; doi:10.1155/2020/3659451)
Supplement: Supplementary 3 — Table S3: DAVID gene ontology functional annotation chart of 90 silent signature genes in HYAL1-overexpressed HFL-1 fibroblasts. [file 3659451.f3.xlsx]

## Sheet: Sheet1
Table legends:
Term: associated with the signature genes;
Count: the number of genes associated with the term;
Percentage (%): number of associated genes/total number of genes;
P-Value: the EASE score used for gene set enrichment analysis based on one-tail Fisher exact probability.
Term	Count	%	P-Value	Fold Enrichment
DNA-binding	24	0.185845	1.16e-05	2.70728
chain:Alcohol dehydrogenase 1C	3	0.023231	5.69e-05	225.427
chain:Alcohol dehydrogenase 1A	3	0.023231	5.69e-05	225.427
chain:Alcohol dehydrogenase 1B	3	0.023231	5.69e-05	225.427
GO:0003677~DNA binding	21	0.162614	0.000135	2.52106
GO:0004024~alcohol dehydrogenase activity, zinc-dependent	3	0.023231	0.000354	100.482
GO:0044344~cellular response to fibroblast growth factor stimulus	4	0.030974	0.000445	26.3404
Developmental protein	13	0.100666	0.0007	3.16777
IPR002328:Alcohol dehydrogenase, zinc-type, conserved site	3	0.023231	0.000714	72.7804
Repressor	10	0.077435	0.000962	3.9062
GO:0001077~transcriptional activator activity, RNA polymerase II core promoter proximal region sequence-specific binding	7	0.054205	0.001078	5.9608
GO:0006069~ethanol oxidation	3	0.023231	0.00158	49.3882
metal ion-binding site:Zinc 1; catalytic	3	0.023231	0.001673	48.3058
Transcription regulation	21	0.162614	0.001707	2.08242
GO:0000978~RNA polymerase II core promoter proximal region sequence-specific DNA binding	8	0.061948	0.00181	4.52877
compositionally biased region:Poly-Ala	8	0.061948	0.001996	4.4639
Phosphoprotein	50	0.387177	0.002151	1.40218
GO:0005667~transcription factor complex	6	0.046461	0.002202	6.51206
Nucleus	36	0.278767	0.002234	1.58751
IPR013154:Alcohol dehydrogenase GroES-like	3	0.023231	0.002331	40.939
IPR020843:Polyketide synthase, enoylreductase	3	0.023231	0.002331	40.939
IPR013149:Alcohol dehydrogenase, C-terminal	3	0.023231	0.002331	40.939
Transcription	21	0.162614	0.002384	2.0251
GO:0003700~transcription factor activity, sequence-specific DNA binding	13	0.100666	0.002495	2.71856
IPR002085:Alcohol dehydrogenase superfamily, zinc-type	3	0.023231	0.002955	36.3902
GO:0005634~nucleus	39	0.301998	0.003057	1.50866
SM00829:SM00829	3	0.023231	0.003599	32.5119
hsa05202:Transcriptionalmisregulation in cancer	6	0.046461	0.003626	5.61704
Energy production and conversion	3	0.023231	0.003932	25.5378
IPR011032:GroES-like	3	0.023231	0.00402	31.1916
GO:0043425~bHLH transcription factor binding	3	0.023231	0.005651	26.2127
Differentiation	9	0.069692	0.00771	3.12028
IPR016040:NAD(P)-binding domain	5	0.038718	0.008871	6.09892
GO:0021510~spinal cord development	3	0.023231	0.009822	19.7553
GO:0008283~cell proliferation	7	0.054205	0.010058	3.77834
103780~Alcohol dependence, protection against	2	0.015487	0.010522	182.308
GO:0070888~E-box binding	3	0.023231	0.0121	17.7321
IPR003070:Orphan nuclear receptor	2	0.015487	0.013518	145.561
GO:0043565~sequence-specific DNA binding	8	0.061948	0.013739	3.1037
domain:Helix-loop-helix motif	4	0.030974	0.014146	7.84094
GO:0001649~osteoblast differentiation	4	0.030974	0.015306	7.59819
IPR011598:Myc-type, basic helix-loop-helix (bHLH) domain	4	0.030974	0.015711	7.52901
GO:0005829~cytosol	25	0.193588	0.017373	1.57972
GO:0001078~transcriptional repressor activity, RNA polymerase II core promoter proximal region sequence-specific binding	4	0.030974	0.017378	7.24196
GO:0000287~magnesium ion binding	5	0.038718	0.018133	4.9256
hsa00350:Tyrosine metabolism	3	0.023231	0.019931	13.4007
region of interest:Substrate binding	4	0.030974	0.019958	6.88327
Neurogenesis	5	0.038718	0.022405	4.62494
binding site:NAD	3	0.023231	0.023484	12.5237
GO:0065004~protein-DNA complex assembly	2	0.015487	0.024766	79.0212
SM00353:HLH	4	0.030974	0.026057	6.13793
IPR001863:Glypican	2	0.015487	0.026855	72.7804
IPR019803:Glypican, conserved site	2	0.015487	0.026855	72.7804
GO:0046982~protein heterodimerization activity	7	0.054205	0.026918	3.02527
hsa00071:Fatty acid degradation	3	0.023231	0.02806	11.1672
GO:0034219~carbohydrate transmembrane transport	2	0.015487	0.029646	65.851
GO:0071376~cellular response to corticotropin-releasing hormone stimulus	2	0.015487	0.029646	65.851
GO:0005515~protein binding	53	0.410407	0.033078	1.21242
GO:0004022~alcohol dehydrogenase (NAD) activity	2	0.015487	0.03392	57.4184
GO:0003183~mitral valve morphogenesis	2	0.015487	0.034502	56.4437
DNA-binding region:Basic motif	4	0.030974	0.034978	5.53195
compositionally biased region:Poly-Pro	6	0.046461	0.037775	3.21274
Oxidoreductase	7	0.054205	0.038545	2.78132
GO:0045892~negative regulation of transcription, DNA-templated	7	0.054205	0.038861	2.77128
GO:0021952~central nervous system projection neuron axonogenesis	2	0.015487	0.039333	49.3882
GO:0035019~somatic stem cell population maintenance	3	0.023231	0.04198	9.11783
metal ion-binding site:Zinc 2	3	0.023231	0.043974	8.89843
Cytoplasm	29	0.224562	0.044051	1.39248
GO:0035767~endothelial cell chemotaxis	2	0.015487	0.044141	43.9006
GO:0031647~regulation of protein stability	3	0.023231	0.047972	8.46655
nucleotide phosphate-binding region:NAD	3	0.023231	0.048216	8.45351
