# Supplementary material for: HYAL1 Is Downregulated in Idiopathic Pulmonary Fibrosis and Inhibits HFL-1 Fibroblast Proliferation When Upregulated
Source: Biomed Res Int. 2020 Mar 11;2020:3659451. doi: 10.1155/2020/3659451 (PMC7086424; doi:10.1155/2020/3659451)
Supplement: Supplementary 4 — Table S4: sample details for GEO data mining. [file 3659451.f4.xlsx]

## Sheet: Sheet1
Sample number	Dataset accession	Sample accession	Sample title in GEO	Source name	Tissue	Lung source	Phenotype	Gender	Age
Control1	GSE24206	GSM595407	Healthy donor_biological replicate1	whole lung tissue_healthy donor lung	lung	routine lung volume reduction	health	unknown	unknown
Control2	GSE24206	GSM595411	Healthy donor_biological replicate2	whole lung tissue_healthy donor lung	lung	routine lung volume reduction	health	unknown	unknown
Control3	GSE24206	GSM595416	Healthy donor_biological replicate4	whole lung tissue_healthy donor lung	lung	routine lung volume reduction	health	unknown	unknown
Control4	GSE24206	GSM595419	Healthy donor_biological replicate6	whole lung tissue_healthy donor lung	lung	routine lung volume reduction	health	unknown	unknown
Control5	GSE10667	GSM269749	control, biological rep1	normal lung tissues, control, biological rep1	lung	normal lung tissues obtained from the disease free margins with normal histology of lung cancer resection	health	unknown	unknown
Control6	GSE10667	GSM269750	control, biological rep2	normal lung tissues, control, biological rep2	lung	normal lung tissues obtained from the disease free margins with normal histology of lung cancer resection	health	unknown	unknown
Control7	GSE10667	GSM269751	control, biological rep3	normal lung tissues, control, biological rep3	lung	normal lung tissues obtained from the disease free margins with normal histology of lung cancer resection	health	unknown	unknown
Control8	GSE10667	GSM269752	control, biological rep4	normal lung tissues, control, biological rep4	lung	normal lung tissues obtained from the disease free margins with normal histology of lung cancer resection	health	unknown	unknown
Control9	GSE10667	GSM269753	control, biological rep5	normal lung tissues, control, biological rep5	lung	normal lung tissues obtained from the disease free margins with normal histology of lung cancer resection	health	unknown	unknown
Control10	GSE10667	GSM269755	control, biological rep7	normal lung tissues, control, biological rep7	lung	normal lung tissues obtained from the disease free margins with normal histology of lung cancer resection	health	unknown	unknown
Control11	GSE10667	GSM269756	control, biological rep8	normal lung tissues, control, biological rep8	lung	normal lung tissues obtained from the disease free margins with normal histology of lung cancer resection	health	unknown	unknown
Control12	GSE10667	GSM269758	control, biological rep10	normal lung tissues, control, biological rep10	lung	normal lung tissues obtained from the disease free margins with normal histology of lung cancer resection	health	unknown	unknown
Control13	GSE10667	GSM269759	control, biological rep11	normal lung tissues, control, biological rep11	lung	normal lung tissues obtained from the disease free margins with normal histology of lung cancer resection	health	unknown	unknown
Control14	GSE10667	GSM269760	control, biological rep12	normal lung tissues, control, biological rep12	lung	normal lung tissues obtained from the disease free margins with normal histology of lung cancer resection	health	unknown	unknown
Control15	GSE10667	GSM269761	control, biological rep13	normal lung tissues, control, biological rep13	lung	normal lung tissues obtained from the disease free margins with normal histology of lung cancer resection	health	unknown	unknown
Control16	GSE10667	GSM269762	control, biological rep14	normal lung tissues, control, biological rep14	lung	normal lung tissues obtained from the disease free margins with normal histology of lung cancer resection	health	unknown	unknown
Control17	GSE10667	GSM269763	control, biological rep15	normal lung tissues, control, biological rep15	lung	normal lung tissues obtained from the disease free margins with normal histology of lung cancer resection	health	unknown	unknown
Control18	GSE16538	GSM415389	Lung-normal-rep4	frozen disease-free lung tissue	lung	surgical	normal	unknown	unknown
Control19	GSE16538	GSM415390	Lung-normal-rep5	frozen disease-free lung tissue	lung	surgical	normal	unknown	unknown
Control20	GSE16538	GSM415391	Lung-normal-rep6	frozen disease-free lung tissue	lung	surgical	normal	unknown	unknown
IPF1	GSE24206	GSM595421	Early IPF_surgical biopsy_upper lobe_rep140	whole lung tissue_early IPF_biopsy	lung, upper lobe	surgical biopsy	early IPF	male	58
IPF2	GSE24206	GSM595422	Early IPF_surgical biopsy_upper lobe_rep142	whole lung tissue_early IPF_biopsy	lung, upper lobe	surgical biopsy	early IPF	female	56
IPF3	GSE24206	GSM595424	Early IPF_surgical biopsy_upper lobe_rep145	whole lung tissue_early IPF_biopsy	lung, upper lobe	surgical biopsy	early IPF	male	54
IPF4	GSE24206	GSM595428	Advanced IPF_explant_upper lobe_rep152	whole lung tissue_advanced IPF_explant	lung, upper lobe	explant	advanced IPF	male	67
IPF5	GSE24206	GSM595429	Advanced IPF_explant_lower lobe_rep152	whole lung tissue_advanced IPF_explant	lung, lower lobe	explant	advanced IPF	male	67
IPF6	GSE24206	GSM595434	Advanced IPF_explant_lower lobe_rep157	whole lung tissue_advanced IPF_explant	lung, lower lobe	explant	advanced IPF	male	67
IPF7	GSE24206	GSM595435	Advanced IPF_explant_upper lobe_rep158	whole lung tissue_advanced IPF_explant	lung, upper lobe	explant	advanced IPF	female	68
IPF8	GSE24206	GSM595437	Advanced IPF_explant_lower lobe_rep158	whole lung tissue_advanced IPF_explant	lung, lower lobe	explant	advanced IPF	female	68
IPF9	GSE24206	GSM595441	Early IPF_surgical biopsy_lower lobe_rep159	whole lung tissue_early IPF_biopsy	lung, lower lobe	surgical biopsy	early IPF	male	68
IPF10	GSE10667	GSM269764	UIP, biological rep1	lung tissue with usual interstitial pneumonia (UIP), biological rep1	lung tissue from a patient with pathological diagnosis of usual interstitial pneumonia	the tissue bank of the Department of Pathology at the University of Pittsburgh	IPF	unknown	unknown
IPF11	GSE10667	GSM269765	UIP, biological rep2	lung tissue with usual interstitial pneumonia (UIP), biological rep2	lung tissue from a patient with pathological diagnosis of usual interstitial pneumonia	the tissue bank of the Department of Pathology at the University of Pittsburgh	IPF	unknown	unknown
IPF12	GSE10667	GSM269767	UIP, biological rep4	lung tissue with usual interstitial pneumonia (UIP), biological rep4	lung tissue from a patient with pathological diagnosis of usual interstitial pneumonia	the tissue bank of the Department of Pathology at the University of Pittsburgh	IPF	unknown	unknown
IPF13	GSE10667	GSM269768	UIP, biological rep5	lung tissue with usual interstitial pneumonia (UIP), biological rep5	lung tissue from a patient with pathological diagnosis of usual interstitial pneumonia	the tissue bank of the Department of Pathology at the University of Pittsburgh	IPF	unknown	unknown
IPF14	GSE10667	GSM269769	UIP, biological rep6	lung tissue with usual interstitial pneumonia (UIP), biological rep6	lung tissue from a patient with pathological diagnosis of usual interstitial pneumonia	the tissue bank of the Department of Pathology at the University of Pittsburgh	IPF	unknown	unknown
IPF15	GSE10667	GSM269770	UIP, biological rep7	lung tissue with usual interstitial pneumonia (UIP), biological rep7	lung tissue from a patient with pathological diagnosis of usual interstitial pneumonia	the tissue bank of the Department of Pathology at the University of Pittsburgh	IPF	unknown	unknown
IPF16	GSE10667	GSM269771	UIP, biological rep8	lung tissue with usual interstitial pneumonia (UIP), biological rep8	lung tissue from a patient with pathological diagnosis of usual interstitial pneumonia	the tissue bank of the Department of Pathology at the University of Pittsburgh	IPF	unknown	unknown
IPF17	GSE10667	GSM269773	UIP, biological rep10	lung tissue with usual interstitial pneumonia (UIP), biological rep10	lung tissue from a patient with pathological diagnosis of usual interstitial pneumonia	the tissue bank of the Department of Pathology at the University of Pittsburgh	IPF	unknown	unknown
IPF18	GSE10667	GSM269774	UIP, biological rep11	lung tissue with usual interstitial pneumonia (UIP), biological rep11	lung tissue from a patient with pathological diagnosis of usual interstitial pneumonia	the tissue bank of the Department of Pathology at the University of Pittsburgh	IPF	unknown	unknown
IPF19	GSE10667	GSM269775	UIP, biological rep12	lung tissue with usual interstitial pneumonia (UIP), biological rep12	lung tissue from a patient with pathological diagnosis of usual interstitial pneumonia	the tissue bank of the Department of Pathology at the University of Pittsburgh	IPF	unknown	unknown
IPF20	GSE10667	GSM269776	UIP, biological rep13	lung tissue with usual interstitial pneumonia (UIP), biological rep13	lung tissue from a patient with pathological diagnosis of usual interstitial pneumonia	the tissue bank of the Department of Pathology at the University of Pittsburgh	IPF	unknown	unknown
IPF21	GSE10667	GSM269777	UIP, biological rep14	lung tissue with usual interstitial pneumonia (UIP), biological rep14	lung tissue from a patient with pathological diagnosis of usual interstitial pneumonia	the tissue bank of the Department of Pathology at the University of Pittsburgh	IPF	unknown	unknown
IPF22	GSE10667	GSM269778	UIP, biological rep15	lung tissue with usual interstitial pneumonia (UIP), biological rep15	lung tissue from a patient with pathological diagnosis of usual interstitial pneumonia	the tissue bank of the Department of Pathology at the University of Pittsburgh	IPF	unknown	unknown
IPF23	GSE10667	GSM269780	UIP, biological rep17	lung tissue with usual interstitial pneumonia (UIP), biological rep17	lung tissue from a patient with pathological diagnosis of usual interstitial pneumonia	the tissue bank of the Department of Pathology at the University of Pittsburgh	IPF	unknown	unknown
IPF24	GSE10667	GSM269781	UIP, biological rep18	lung tissue with usual interstitial pneumonia (UIP), biological rep18	lung tissue from a patient with pathological diagnosis of usual interstitial pneumonia	the tissue bank of the Department of Pathology at the University of Pittsburgh	IPF	unknown	unknown
IPF25	GSE10667	GSM269782	UIP, biological rep19	lung tissue with usual interstitial pneumonia (UIP), biological rep19	lung tissue from a patient with pathological diagnosis of usual interstitial pneumonia	the tissue bank of the Department of Pathology at the University of Pittsburgh	IPF	unknown	unknown
IPF26	GSE10667	GSM269783	UIP, biological rep20	lung tissue with usual interstitial pneumonia (UIP), biological rep20	lung tissue from a patient with pathological diagnosis of usual interstitial pneumonia	the tissue bank of the Department of Pathology at the University of Pittsburgh	IPF	unknown	unknown
IPF27	GSE10667	GSM269784	UIP, biological rep21	lung tissue with usual interstitial pneumonia (UIP), biological rep21	lung tissue from a patient with pathological diagnosis of usual interstitial pneumonia	the tissue bank of the Department of Pathology at the University of Pittsburgh	IPF	unknown	unknown
IPF28	GSE10667	GSM269786	UIP, biological rep23	lung tissue with usual interstitial pneumonia (UIP), biological rep23	lung tissue from a patient with pathological diagnosis of usual interstitial pneumonia	the tissue bank of the Department of Pathology at the University of Pittsburgh	IPF	unknown	unknown
IPF29	GSE10667	GSM373881	AEx, biological rep1	lung tissue with acute exacerbations of idiopathic pulmonary fibrosis (IPF-AEx), biological rep1	tissue from a patient with pathological diagnosis of usual interstitial pneumonia with diffuse alveolar damage	the tissue bank of the Department of Pathology at the University of Pittsburgh	IPF with acute exacerbations	unknown	unknown
IPF30	GSE10667	GSM373882	AEx, biological rep2	lung tissue with acute exacerbations of idiopathic pulmonary fibrosis (IPF-AEx), biological rep2	tissue from a patient with pathological diagnosis of usual interstitial pneumonia with diffuse alveolar damage	the tissue bank of the Department of Pathology at the University of Pittsburgh	IPF with acute exacerbations	unknown	unknown
IPF31	GSE10667	GSM373883	AEx, biological rep3	lung tissue with acute exacerbations of idiopathic pulmonary fibrosis (IPF-AEx), biological rep3	tissue from a patient with pathological diagnosis of usual interstitial pneumonia with diffuse alveolar damage	the tissue bank of the Department of Pathology at the University of Pittsburgh	IPF with acute exacerbations	unknown	unknown
IPF32	GSE10667	GSM373884	AEx, biological rep4	lung tissue with acute exacerbations of idiopathic pulmonary fibrosis (IPF-AEx), biological rep4	tissue from a patient with pathological diagnosis of usual interstitial pneumonia with diffuse alveolar damage	the tissue bank of the Department of Pathology at the University of Pittsburgh	IPF with acute exacerbations	unknown	unknown
IPF33	GSE10667	GSM373886	AEx, biological rep6	lung tissue with acute exacerbations of idiopathic pulmonary fibrosis (IPF-AEx), biological rep6	tissue from a patient with pathological diagnosis of usual interstitial pneumonia with diffuse alveolar damage	the tissue bank of the Department of Pathology at the University of Pittsburgh	IPF with acute exacerbations	unknown	unknown
IPF34	GSE10667	GSM373887	AEx, biological rep7	lung tissue with acute exacerbations of idiopathic pulmonary fibrosis (IPF-AEx), biological rep7	tissue from a patient with pathological diagnosis of usual interstitial pneumonia with diffuse alveolar damage	the tissue bank of the Department of Pathology at the University of Pittsburgh	IPF with acute exacerbations	unknown	unknown
IPF35	GSE10667	GSM373888	AEx, biological rep8	lung tissue with acute exacerbations of idiopathic pulmonary fibrosis (IPF-AEx), biological rep8	tissue from a patient with pathological diagnosis of usual interstitial pneumonia with diffuse alveolar damage	the tissue bank of the Department of Pathology at the University of Pittsburgh	IPF with acute exacerbations	unknown	unknown
